# Supplementary material for: The Microbial and Metabolic Signatures of Patients with Stable Coronary Artery Disease
Source: PubMed Central journal article supplement (PMC9769616; doi:10.1128/spectrum.02467-22), 2022-11-10
Supplement: spectrum.02467-22-s0001.pdf [file spectrum.02467-22-s0001.pdf]

## Supplementary materials

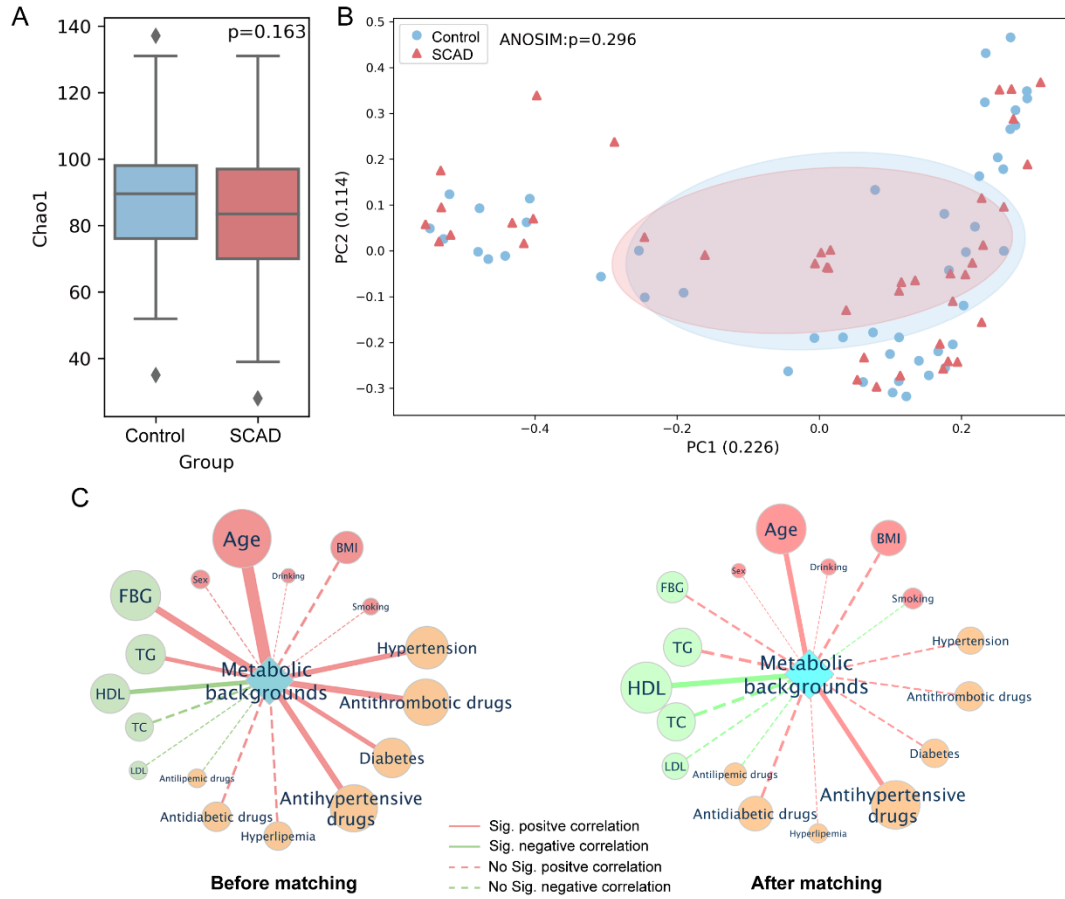

**Figure S1 Individual differences confuse the differences between HCs and SCAD patients. (A)** (B) Alpha-diversity, beta-diversity of gut microbiome showed no alteration between HCs and SCAD patients before PSM. Wilcoxon rank-sum test and Analysis of Similarities (ANOSIM) was used to determine the significance. (C) Correlation of demographics and clinical characteristics with metabolic background before and after PSM. The size of circles and thickness of links indicated the r value of Spearman correlation.

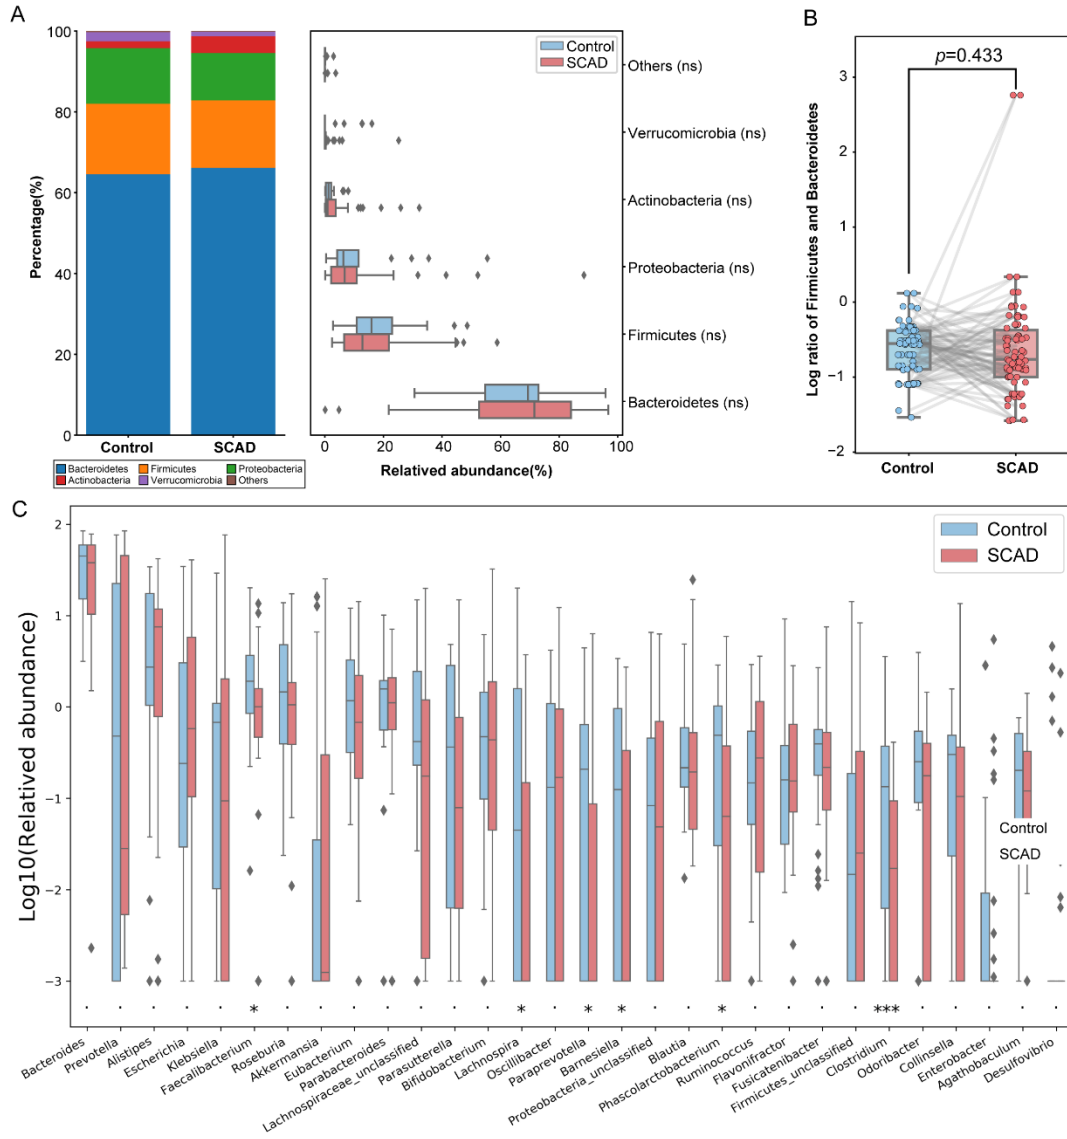

**Figure S2 Gut microbiome variations at the phylum and genus level in the cohort.** (A) The proportion and relative abundance of the five most abundant phylum in the two groups. (B) The ratio of *Bacteroidetes* to *Firmicutes* between the two groups. (C) The relative abundance of the thirty most abundant genera in the two groups. Wilcoxon signed-rank test was used to determine the significance. \* $P < 0.05$ , \*\*\* $P < 0.001$ .

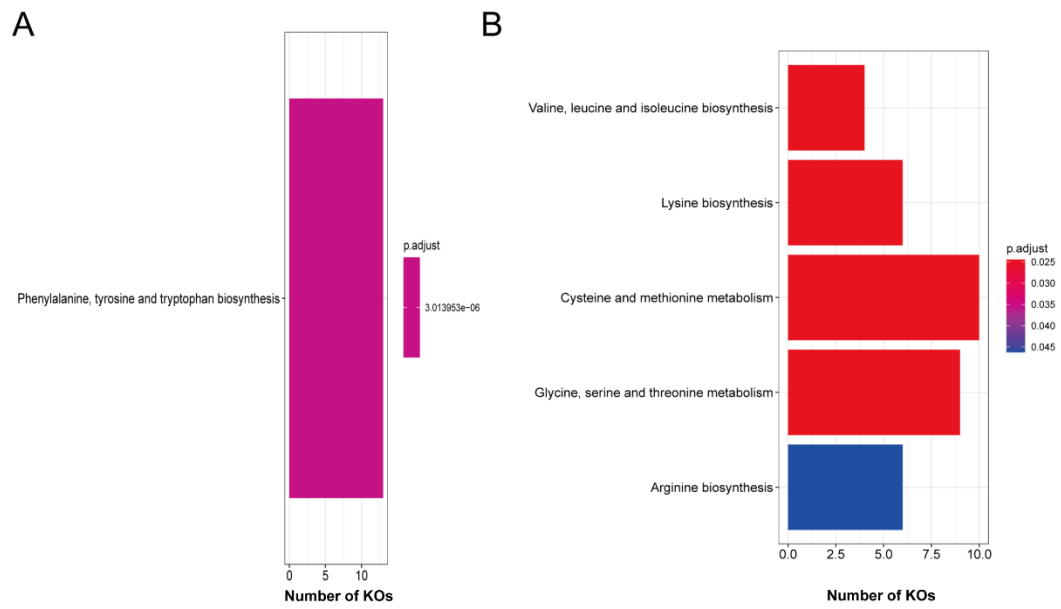

**Figure S3** The different amino acid metabolic pathways enriched by up-regulated (A) and down-regulated (B) KOs in SCAD.

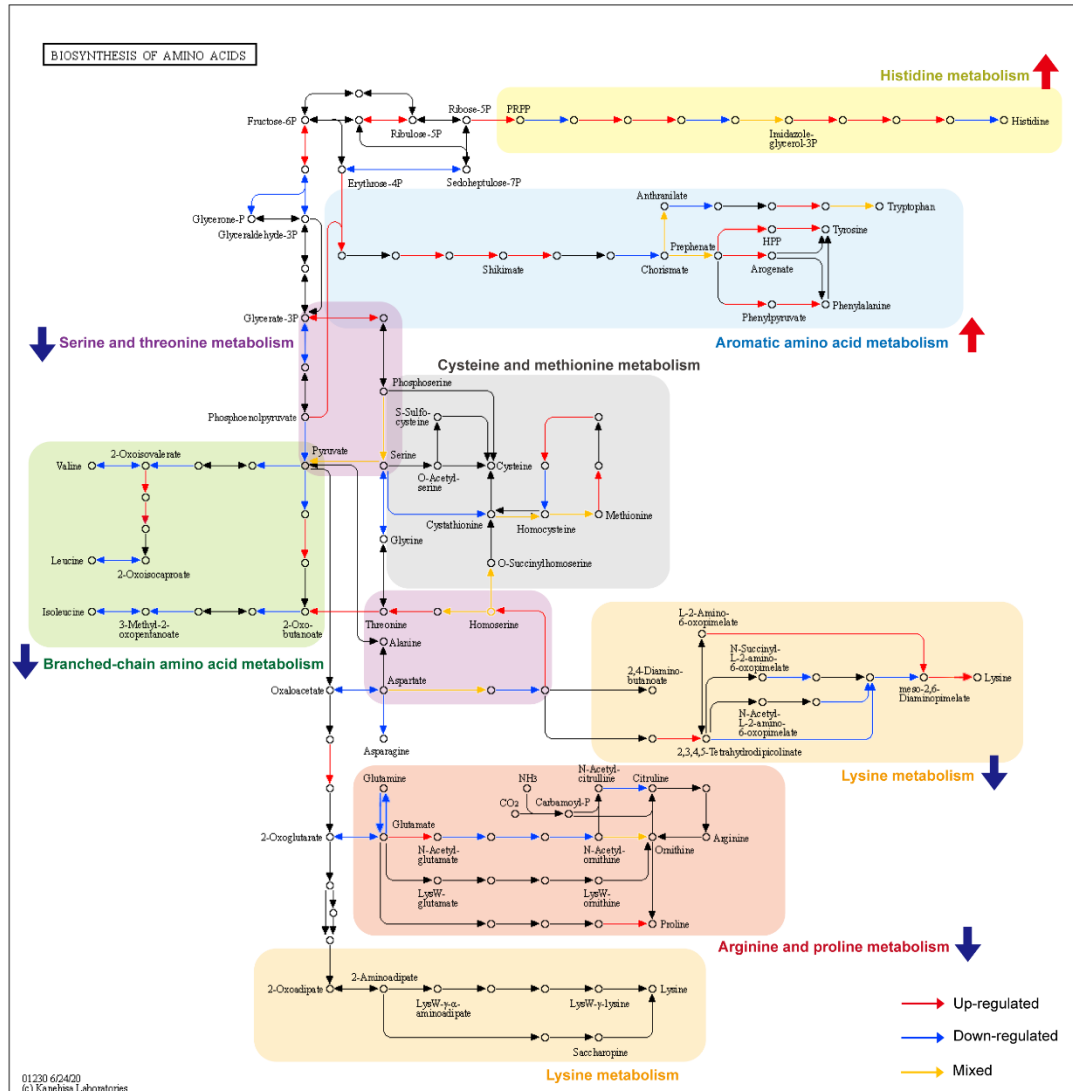

**Figure S4 Key amino acid metabolic pathways mapped by microbial differential KO genes.** The pathways were generated on the basis of KEGG pathway maps. Blue arrows represent down-regulated KO or pathways, red arrows represent up-regulated KO or pathways, yellow arrows indicate the trend is unclear, which mixed up and down regulated KO in SCAD patients.

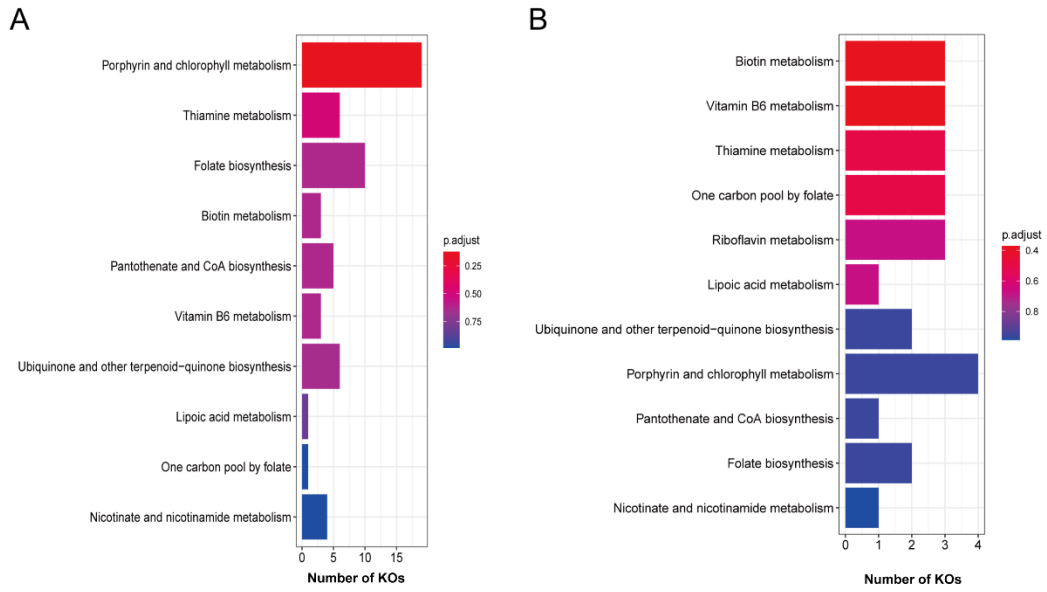

**Figure S5** The different cofactor metabolic pathways enriched by up-regulated (A) and down-regulated (B) KOs in SCAD.

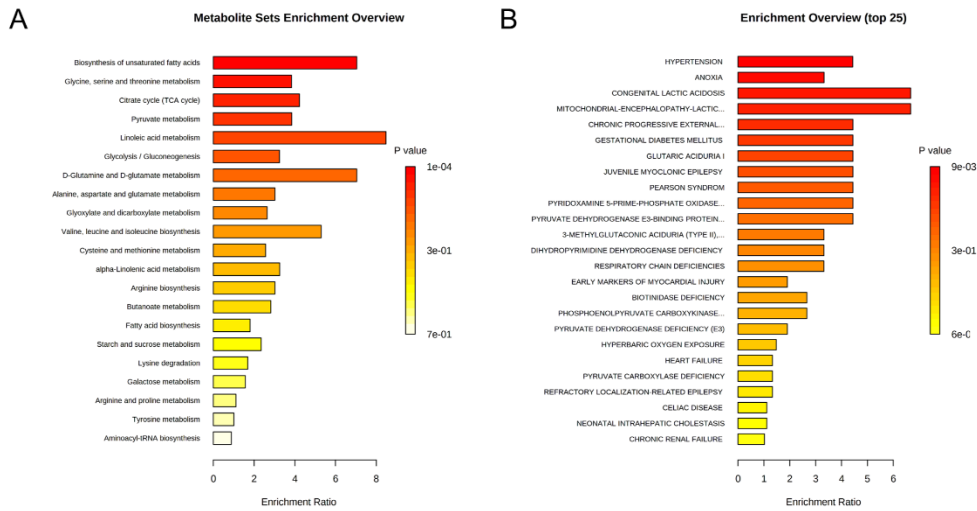

**Figure S6** The metabolic pathway (A) and the human disease (B) enrichment analysis of differential serum metabolites in SCAD by MetaboAnalyst.

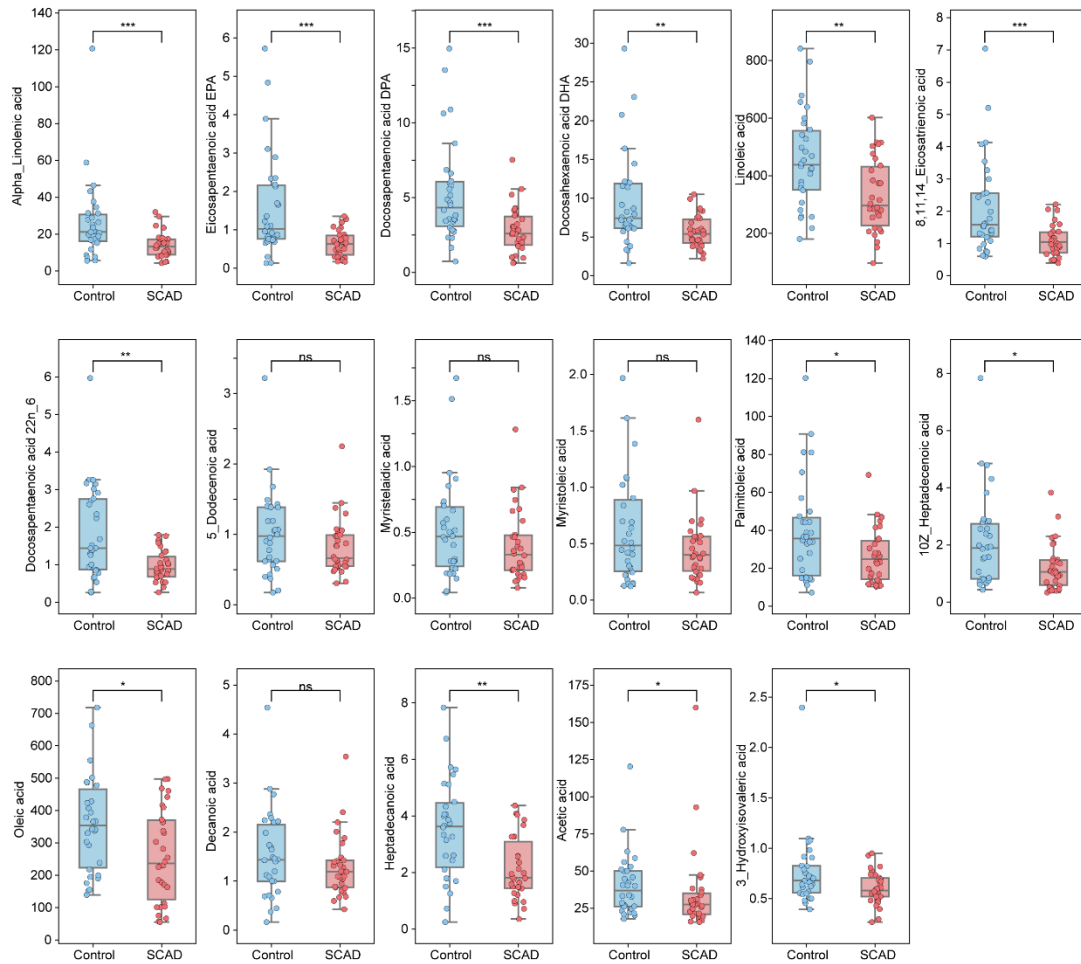

**Figure S7** The relative abundances of unsaturated fatty acid between SCAD patients (n=30) and HCs (n=30) in an independent cohort. Wilcoxon ranksum test was used to determine the significance. \* $P < 0.05$ , \*\* $P < 0.01$  \*\*\* $P < 0.001$ .

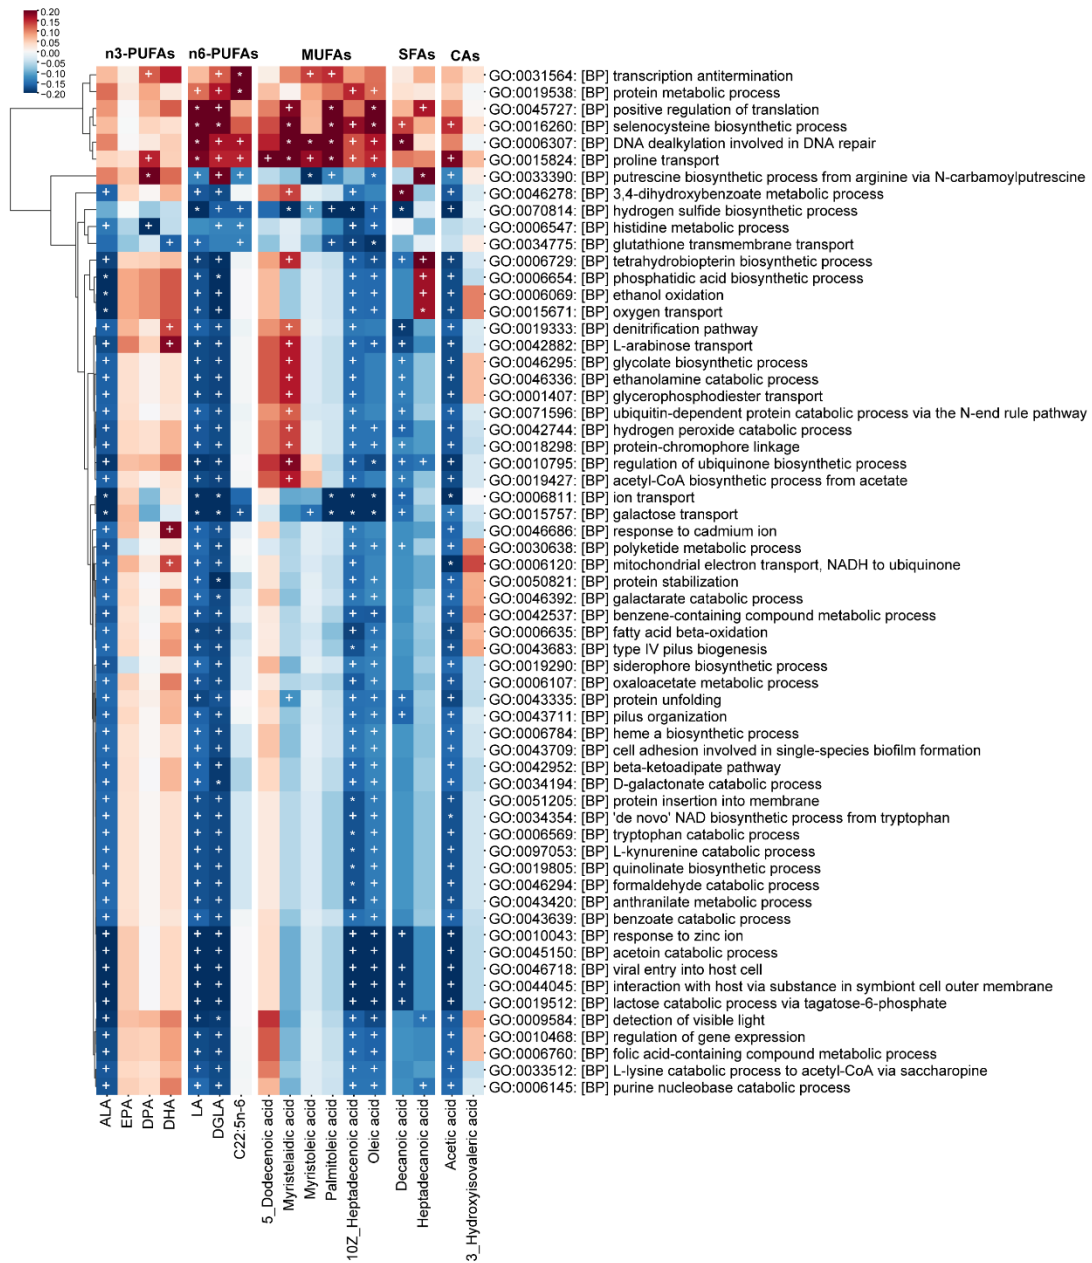

**Figure S8 The key GO terms (biological process) correlated to fatty acids.** The signs of change trend for each paired samples in cohort were calculated, and then normalized mutual information score was used to evaluate the association of change trends. Normalized mutual information score ranges from 0 to 1, indicating that the association between the two trends ranges from weak to strong. The sign of score was evaluated by the direction consistency of two trends. Permutation test (1000 permutations) was performed to determine p-value of correlation and GO term significant correlated to >5 fatty acids was selected for display. \* and + suggest the significance, +  $P < 0.05$ , \*  $P < 0.01$ .

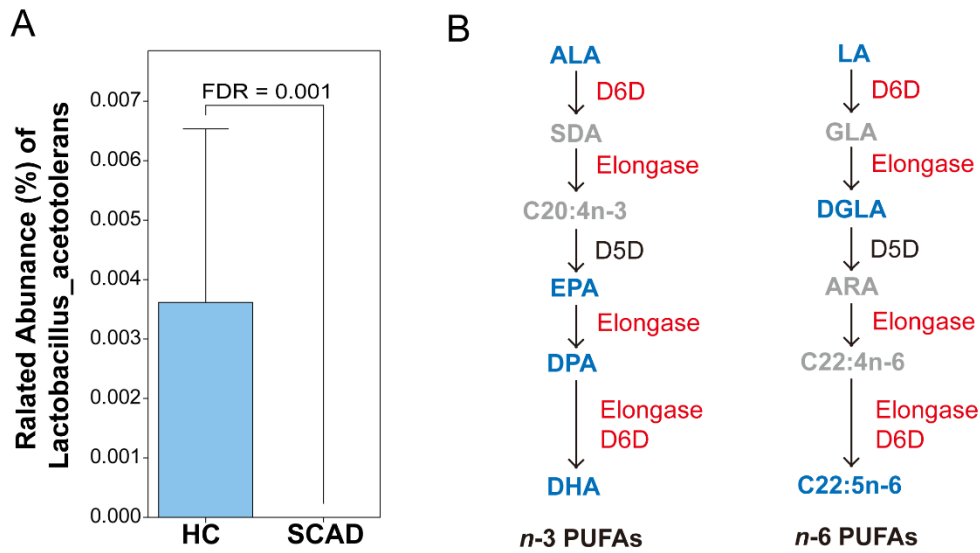

**Figure S9 The abundance of microbial species and enzyme for metabolizing unsaturated fatty acid in SCAD.** (A) Relative abundance of *Lactobacillus acetotolerans* between the two groups. Wilcoxon signed-rank test,  $P_{FDR} < 0.001$ . (B) Metabolism of alpha\_linolenic acid (ALA) and alpha\_linoleic acid (LA) by gut microbes. Blue represents the unsaturated fatty acids decreased significantly in SCAD patients. Red represents the relative abundance of metabolic enzyme for unsaturated fatty acids increased significantly in SCAD. SDA: Stearidonic acid; EPA: Eicosapentaenoic acid; DPA: Docosapentaenoic acid; DHA: Docosahexaenoic acid; GLA: Gamma-linolenic acid; DGLA: Dihomo-gamma-linolenic acid; ARA: Arachidonic acid; D6D: Delta-6 desaturase, D5D: Delta-5 desaturase.



**Table S1 The characteristics of the study population before PSM.**

| <b>Feature</b>         | <b>Control(46)</b>      | <b>SCAD(42)</b>         | <b>p-value</b>     |
|------------------------|-------------------------|-------------------------|--------------------|
| Age,years              | 58.174 (55.454, 60.894) | 66.452 (63.897, 69.007) | <b>0.000137469</b> |
| Sex                    | 20 (43.478%)            | 15 (35.714%)            | 0.516917767        |
| BMI,kg/m <sup>2</sup>  | 23.507 (22.606, 24.408) | 24.217 (23.098, 25.336) | 0.213221628        |
| Smoking                | 12 (26.087%)            | 10 (23.81%)             | 1                  |
| Drinking               | 14 (30.435%)            | 9 (21.429%)             | 0.466816253        |
| Hypertension           | 13 (28.261%)            | 28 (66.667%)            | <b>0.000543693</b> |
| Diabetes               | 6 (13.043%)             | 17 (40.476%)            | <b>0.004008625</b> |
| Hyperlipemia           | 10 (21.739%)            | 22 (52.381%)            | <b>0.003879397</b> |
| Antilipemic drugs      | 3 (6.522%)              | 5 (11.905%)             | 0.471014552        |
| Antihypertensive drugs | 6 (13.043%)             | 13 (30.952%)            | 0.067868752        |
| Antidiabetic drugs     | 2 (4.348%)              | 3 (7.143%)              | 0.666375772        |
| Antithrombotic drugs   | 1 (2.174%)              | 15 (35.714%)            | <b>3.94E-05</b>    |
| TG,mmol/l              | 1.205 (1.0, 1.411)      | 1.52 (1.303, 1.738)     | <b>0.003143386</b> |
| TC,mmol/l              | 4.961 (4.663, 5.26)     | 4.551 (4.232, 4.87)     | 0.139206085        |
| HDL-C,mmol/l           | 1.434 (1.33, 1.538)     | 1.32 (1.228, 1.412)     | <b>0.030147511</b> |
| LDL-C,mmol/l           | 2.941 (2.673, 3.208)    | 2.632 (2.373, 2.891)    | 0.277451658        |
| FBG,mmol/l             | 5.711 (5.288, 6.134)    | 6.872 (6.235, 7.51)     | <b>0.00022943</b>  |
| HCY                    | 13.774 (11.735, 15.812) | 14.948 (13.116, 16.779) | 0.354341742        |
| CRP                    | 1.411 (0.918, 1.904)    | 1.926 (1.263, 2.589)    | 0.49821985         |

**Table S2 The metabolic pathways of gut microbiome showed no alteration between HCs and SCAD patients before PSM.**

| <b>Pathway</b>                                                                  | <b>Normal_mean</b> | <b>CAD_mean</b> | <b>FC</b>   | <b>p_value</b> | <b>FDR</b>  |
|---------------------------------------------------------------------------------|--------------------|-----------------|-------------|----------------|-------------|
| PWY-6703: preQ0 biosynthesis                                                    | 0.007232951        | 0.005477955     | 0.757361046 | 0.0014583      | 0.250224435 |
| HSERMETANA-PWY: L-methionine biosynthesis III                                   | 0.005051828        | 0.003583221     | 0.709291971 | 0.002170152    | 0.250224435 |
| PWY-6163: chorismate biosynthesis from 3-dehydroquinate                         | 0.010256084        | 0.008630511     | 0.841501593 | 0.00229457     | 0.250224435 |
| PWY-3781: aerobic respiration I (cytochrome c)                                  | 0.000232386        | 0.000259634     | 1.117255747 | 0.002708057    | 0.250224435 |
| 1CMET2-PWY: N10-formyl-tetrahydrofolate biosynthesis                            | 0.009680658        | 0.008401525     | 0.867867208 | 0.010327583    | 0.328487829 |
| PWY-5973: cis-vaccenate biosynthesis                                            | 0.007778353        | 0.006815503     | 0.876214162 | 0.011918777    | 0.328487829 |
| PWY-6531: mannitol cycle                                                        | 0.000489463        | 0.000651055     | 1.330141076 | 0.012793077    | 0.328487829 |
| PWY-7234: inosine-5'-phosphate biosynthesis III                                 | 0.002914636        | 0.003750303     | 1.286713753 | 0.014046878    | 0.328487829 |
| PWY0-1261: anhydromuropeptides recycling                                        | 0.00302615         | 0.003575844     | 1.181647902 | 0.014376795    | 0.328487829 |
| PANTOSYN-PWY: pantothenate and coenzyme A biosynthesis I                        | 0.00922876         | 0.008127397     | 0.880659668 | 0.017271488    | 0.328487829 |
| PWY-7229: superpathway of adenosine nucleotides de novo biosynthesis I          | 0.008229967        | 0.007544152     | 0.916668563 | 0.020211456    | 0.328487829 |
| TCA: TCA cycle I (prokaryotic)                                                  | 0.001454751        | 0.002034833     | 1.398749962 | 0.021127894    | 0.328487829 |
| PWY-6126: superpathway of adenosine nucleotides de novo biosynthesis II         | 0.007425054        | 0.006715047     | 0.904376881 | 0.021599539    | 0.328487829 |
| PWY-5690: TCA cycle II (plants and fungi)                                       | 0.000752812        | 0.001067326     | 1.417786034 | 0.025165055    | 0.328487829 |
| COA-PWY-1: coenzyme A biosynthesis II (mammalian)                               | 0.010839875        | 0.009491298     | 0.875591141 | 0.026842698    | 0.328487829 |
| COA-PWY: coenzyme A biosynthesis I                                              | 0.010487931        | 0.009063179     | 0.86415322  | 0.026842698    | 0.328487829 |
| PWY-6125: superpathway of guanosine nucleotides de novo biosynthesis II         | 0.006514189        | 0.005375971     | 0.825270898 | 0.026842698    | 0.328487829 |
| PWY-7221: guanosine ribonucleotides de novo biosynthesis                        | 0.011907983        | 0.010331961     | 0.867649991 | 0.026842698    | 0.328487829 |
| FERMENTATION-PWY: mixed acid fermentation                                       | 0.001018946        | 0.001514003     | 1.485851534 | 0.028014034    | 0.328487829 |
| PWY-7228: superpathway of guanosine nucleotides de novo biosynthesis I          | 0.006872096        | 0.005656385     | 0.823094548 | 0.028616045    | 0.328487829 |
| PWY-7663: gondoate biosynthesis (anaerobic)                                     | 0.007138291        | 0.006420566     | 0.899454202 | 0.029229165    | 0.328487829 |
| FASYN-INITIAL-PWY: superpathway of fatty acid biosynthesis initiation (E. coli) | 0.002525776        | 0.003237428     | 1.281755997 | 0.031795983    | 0.328487829 |
| PWY-7222: guanosine deoxyribonucleotides de novo biosynthesis II                | 0.006148659        | 0.005351731     | 0.870389932 | 0.036007533    | 0.328487829 |
| PWY-7220: adenosine deoxyribonucleotides de novo biosynthesis II                | 0.006148659        | 0.005351731     | 0.870389932 | 0.036007533    | 0.328487829 |

|                                                                               |             |             |             |             |             |
|-------------------------------------------------------------------------------|-------------|-------------|-------------|-------------|-------------|
| PWY-6282: palmitoleate biosynthesis I (from (5Z)-dodec-5-enoate)              | 0.002649117 | 0.003295799 | 1.24411236  | 0.036753801 | 0.328487829 |
| PWY-5695: urate biosynthesis/inosine 5'-phosphate degradation                 | 0.010805133 | 0.00963035  | 0.891275445 | 0.037513203 | 0.328487829 |
| PWY-6969: TCA cycle V (2-oxoglutarate:ferredoxin oxidoreductase)              | 0.000851151 | 0.001143597 | 1.343588898 | 0.037513203 | 0.328487829 |
| PWY0-1479: tRNA processing                                                    | 0.001542104 | 0.001946264 | 1.262083331 | 0.038285917 | 0.328487829 |
| P461-PWY: hexitol fermentation to lactate, formate, ethanol and acetate       | 0.001013992 | 0.001424673 | 1.405013181 | 0.039871994 | 0.328487829 |
| FASYN-ELONG-PWY: fatty acid elongation -- saturated                           | 0.003058435 | 0.003711046 | 1.213380653 | 0.039871994 | 0.328487829 |
| PWY-5989: stearate biosynthesis II (bacteria and plants)                      | 0.002555086 | 0.003117938 | 1.220286878 | 0.039871994 | 0.328487829 |
| PWY-5676: acetyl-CoA fermentation to butanoate II                             | 0.000594567 | 0.000769594 | 1.294375922 | 0.041513476 | 0.328487829 |
| PWY-5188: tetrapyrrole biosynthesis I (from glutamate)                        | 0.001636502 | 0.002027769 | 1.239087235 | 0.042355449 | 0.328487829 |
| PWY-7664: oleate biosynthesis IV (anaerobic)                                  | 0.002863673 | 0.003499989 | 1.2222027   | 0.042355449 | 0.328487829 |
| PWYG-321: mycolate biosynthesis                                               | 0.00295927  | 0.003633113 | 1.227705908 | 0.042355449 | 0.328487829 |
| DENOVOPURINE2-PWY: superpathway of purine nucleotides de novo biosynthesis II | 0.006201834 | 0.005595924 | 0.902301494 | 0.043211823 | 0.328487829 |
| PWY0-862: (5Z)-dodec-5-enoate biosynthesis                                    | 0.002645592 | 0.003257484 | 1.231287403 | 0.043211823 | 0.328487829 |
| PWY-4041: &gamma;-glutamyl cycle                                              | 0.001328639 | 0.001679782 | 1.264287214 | 0.044082782 | 0.328487829 |
| PWY-6823: molybdenum cofactor biosynthesis                                    | 0.00013027  | 0.000176581 | 1.355504583 | 0.046325221 | 0.331088229 |
| PWY-7388: octanoyl-[acyl-carrier protein] biosynthesis (mitochondria, yeast)  | 0.00262626  | 0.003278302 | 1.248277928 | 0.046785047 | 0.331088229 |
| PWY-6215: 4-chlorobenzoate degradation                                        | 1.72203E-05 | 1.77603E-05 | 1.031359919 | 0.047248708 | 0.331088229 |
| PWY-6519: 8-amino-7-oxononanoate biosynthesis I                               | 0.002735855 | 0.003294625 | 1.204239652 | 0.049625367 | 0.331088229 |
| P441-PWY: superpathway of N-acetylneuraminic acid degradation                 | 0.001183629 | 0.001638798 | 1.384553603 | 0.049625367 | 0.331088229 |

---

**Table S3 The characteristics of the study population after PSM.**

| <b>Feature</b>         | <b>Control(78)</b>      | <b>SCAD(78)</b>         | <b>p-value</b>     |
|------------------------|-------------------------|-------------------------|--------------------|
| Age,years              | 62.103 (59.914, 64.291) | 66.462 (64.601, 68.322) | <b>0.005073852</b> |
| Sex                    | 37 (47.436%)            | 26 (33.333%)            | 0.102389684        |
| BMI,kg/m2              | 23.312 (22.681, 23.942) | 24.387 (23.585, 25.189) | <b>0.04716341</b>  |
| Smoking                | 22 (28.205%)            | 18 (23.077%)            | 0.582606188        |
| Drinking               | 31 (39.744%)            | 18 (23.077%)            | <b>0.037901121</b> |
| Hypertension           | 23 (29.487%)            | 54 (69.231%)            | <b>1.15E-06</b>    |
| Diabetes               | 9 (11.538%)             | 32 (41.026%)            | <b>4.52E-05</b>    |
| Hyperlipemia           | 15 (19.231%)            | 42 (53.846%)            | <b>1.18E-05</b>    |
| Antilipemic drugs      | 9 (11.538%)             | 10 (12.821%)            | 1                  |
| Antihypertensive drugs | 9 (11.538%)             | 24 (30.769%)            | <b>0.00551813</b>  |
| Antidiabetic drugs     | 0 (0.0%)                | 6 (7.692%)              | <b>0.028284973</b> |
| Antithrombotic drugs   | 5 (6.41%)               | 26 (33.333%)            | <b>3.48E-05</b>    |
| TG,mmol/l              | 1.137 (1.036, 1.238)    | 1.527 (1.366, 1.688)    | <b>0.000232484</b> |
| TC,mmol/l              | 5.139 (4.893, 5.384)    | 4.574 (4.351, 4.796)    | <b>0.006537585</b> |
| HDL-C,mmol/l           | 1.447 (1.364, 1.531)    | 1.337 (1.272, 1.402)    | <b>0.016207389</b> |
| LDL-C,mmol/l           | 3.114 (2.892, 3.336)    | 2.636 (2.451, 2.821)    | <b>0.01528136</b>  |
| FBG,mmol/l             | 5.997 (5.683, 6.311)    | 6.944 (6.473, 7.415)    | <b>0.003866317</b> |
| HCY                    | 15.05 (13.77, 16.33)    | 15.228 (13.881, 16.575) | 0.97014804         |
| CRP                    | 1.503 (1.2, 1.807)      | 1.911 (1.436, 2.387)    | 0.563837872        |

**Table S4 The genera differentially abundant between SCAD patients and HCs.**

| <b>Genus</b>                                          | <b>Normal_mean</b> | <b>SCAD_mean</b> | <b>FC</b>   | <b>p_value</b> | <b>FDR</b>  |
|-------------------------------------------------------|--------------------|------------------|-------------|----------------|-------------|
| Rothia                                                | 0.009939359        | 0.001727179      | 0.173771718 | 4.96E-09       | 7.94E-07    |
| Clostridium                                           | 0.408369744        | 0.06456641       | 0.158107723 | 9.36E-07       | 7.48E-05    |
| Actinomyces                                           | 0.055873718        | 0.016315385      | 0.292004635 | 1.76E-06       | 9.41E-05    |
| Ralstonia                                             | 0.031191923        | 0.096620256      | 3.097604985 | 8.34E-05       | 0.003335741 |
| Leuconostoc                                           | 0.000640256        | 6.92E-06         | 0.010812976 | 0.000436135    | 0.012447954 |
| Paraprevotella                                        | 0.715396154        | 0.389663333      | 0.544681896 | 0.000490948    | 0.012447954 |
| Clostridiales_Family_XIII_Incertae_Sedis_unclassified | 0.001356282        | 0                | 0           | 0.000553718    | 0.012447954 |
| Asaccharobacter                                       | 0.026270769        | 0.025449744      | 0.96874756  | 0.000686389    | 0.012447954 |
| Anaeromassilibacillus                                 | 0.001659231        | 0.000253333      | 0.152681193 | 0.000700197    | 0.012447954 |
| Barnesiella                                           | 0.621885897        | 0.239777692      | 0.385565412 | 0.001066393    | 0.017062292 |
| Adlercreutzia                                         | 0.076323462        | 0.074883846      | 0.98113797  | 0.00136076     | 0.019792876 |
| Phascolarctobacterium                                 | 0.58907            | 0.432380769      | 0.734005754 | 0.001747526    | 0.021739528 |
| Peptoniphilus                                         | 0.001596667        | 0                | 0           | 0.001766337    | 0.021739528 |
| Peptococcus                                           | 0.000531923        | 0                | 0           | 0.002699796    | 0.026997961 |
| Varibaculum                                           | 6.23E-05           | 0                | 0           | 0.002699796    | 0.026997961 |
| Tissierellia_unclassified                             | 0.000333462        | 0                | 0           | 0.002699796    | 0.026997961 |
| Holdemanella                                          | 0.027072436        | 0.002506923      | 0.092600573 | 0.002919021    | 0.027473138 |
| Cloacibacillus                                        | 0.004181026        | 3.08E-05         | 0.007359254 | 0.003983112    | 0.033873519 |
| Faecalibacterium                                      | 2.860007436        | 1.907406923      | 0.666923764 | 0.00402248     | 0.033873519 |
| Anaerococcus                                          | 0.001712308        | 2.54E-05         | 0.014824798 | 0.004473649    | 0.035397356 |
| Enterococcus                                          | 0.000174872        | 0.007477179      | 42.75806452 | 0.004645903    | 0.035397356 |
| Lachnospira                                           | 1.050570897        | 0.327135385      | 0.311388204 | 0.00543029     | 0.038331391 |
| Methanosphaera                                        | 0.00139            | 0                | 0           | 0.005749709    | 0.038331391 |
| Sanguibacteroides                                     | 0.002127308        | 0                | 0           | 0.005749709    | 0.038331391 |

|                                  |             |             |             |             |             |
|----------------------------------|-------------|-------------|-------------|-------------|-------------|
| Megasphaera                      | 0.009825513 | 0.524394615 | 53.37071204 | 0.007351906 | 0.047052196 |
| Pseudoflavonifractor             | 0.001350641 | 0           | 0           | 0.008150972 | 0.048302054 |
| Desulfovibrionaceae_unclassified | 0.008865769 | 0           | 0           | 0.008150972 | 0.048302054 |

---

**Table S5 The species differentially abundant between SCAD patients and HCs.**

| <b>Species</b>               | <b>Normal_mean</b> | <b>SCAD_mean</b> | <b>FC</b>   | <b>p_value</b> | <b>FDR</b>  |
|------------------------------|--------------------|------------------|-------------|----------------|-------------|
| Actinomyces_odontolyticus    | 0.005934615        | 0.001166923      | 0.196629942 | 2.50E-07       | 2.36E-05    |
| Actinomyces_sp_HMSC035G02    | 0.001993205        | 0.000204103      | 0.102399177 | 2.31E-05       | 0.001091146 |
| Actinomyces_sp_ICM47         | 0.037781282        | 0.007194615      | 0.190428037 | 9.17E-06       | 0.000577762 |
| Actinomyces_sp_S6_Spd3       | 0.000756667        | 6.95E-05         | 0.091833277 | 0.00555138     | 0.031026186 |
| Bifidobacterium_dentium      | 0.030114872        | 0.487255128      | 16.17988386 | 0.004882681    | 0.03076089  |
| Rothia_mucilaginosa          | 0.009822308        | 0.001370513      | 0.139530634 | 2.52E-09       | 4.76E-07    |
| Bacteroides_clarus           | 0.011053718        | 0.225216667      | 20.37474339 | 0.00110657     | 0.010457086 |
| Bacteroides_massiliensis     | 0.330961026        | 0.109498205      | 0.330849244 | 9.70E-05       | 0.001833716 |
| Bacteroides_nordii           | 0.000222564        | 0.002775641      | 12.47119816 | 0.000492585    | 0.006999948 |
| Barnesiella_intestinihominis | 0.621885897        | 0.239777692      | 0.385565412 | 0.001066393    | 0.010457086 |
| Paraprevotella_xylaniphila   | 0.616380385        | 0.337727692      | 0.547920896 | 0.000189832    | 0.003261667 |
| Prevotella_timonensis        | 0.017463462        | 0.006530256      | 0.373938259 | 0.000231731    | 0.003649765 |
| Parabacteroides_merdae       | 0.966547179        | 0.354800769      | 0.367080652 | 2.89E-05       | 0.001094267 |
| Gemella_sanguinis            | 0.001779231        | 0.000198462      | 0.11154345  | 0.000518515    | 0.006999948 |
| Lactobacillus_acetotolerans  | 0.00489141         | 0                | 0           | 3.68E-05       | 0.001158724 |
| Streptococcus_mitis          | 0.004259872        | 9.41E-05         | 0.022090469 | 7.84E-05       | 0.001751264 |
| Streptococcus_oralis         | 0.001336795        | 0                | 0           | 0.002106265    | 0.017308002 |
| Clostridium_sp_CAG_242       | 0.022316538        | 0.001890256      | 0.084702043 | 0.00731266     | 0.039488366 |
| Clostridium_sp_CAG_58        | 0.126487179        | 0.03132359       | 0.247642408 | 0.000786546    | 0.008258737 |
| Eubacterium_ramulus          | 0.045735513        | 0.021014359      | 0.459475748 | 0.000616375    | 0.00776633  |
| Eubacterium_ventriosum       | 0.001425128        | 0.009101795      | 6.386649874 | 0.001409272    | 0.01210693  |
| Ruminococcus_torques         | 0.09703141         | 0.036453333      | 0.375685907 | 7.99E-05       | 0.001751264 |
| Lachnospira_pectinoschiza    | 1.050570897        | 0.327135385      | 0.311388204 | 0.00543029     | 0.031026186 |

|                                |             |             |             |             |             |
|--------------------------------|-------------|-------------|-------------|-------------|-------------|
| Roseburia_hominis              | 0.141373333 | 0.449818718 | 3.181779105 | 0.003324635 | 0.024167542 |
| Anaeromassilibacillus_sp_An250 | 0.001659231 | 0.000253333 | 0.152681193 | 0.000700197 | 0.007784548 |
| Holdemanella_biformis          | 0.027072436 | 0.002506923 | 0.092600573 | 0.002919021 | 0.02269672  |
| Firmicutes_bacterium_CAG_83    | 0.038350256 | 0.271390769 | 7.076635064 | 0.005442185 | 0.031026186 |
| Phascolarctobacterium_faecium  | 0.473231282 | 0.280537436 | 0.592812535 | 0.00558143  | 0.031026186 |
| Megasphaera_elsdenii           | 0.00945359  | 0.520682564 | 55.07776181 | 0.004744444 | 0.03076089  |
| Ralstonia_pickettii            | 0.031191923 | 0.096620256 | 3.097604985 | 8.34E-05    | 0.001751264 |

---



**Table S6 The differential KOs of gut microbes between SCAD patients and HCs.**

| <b>KO</b> | <b>Normal_mean</b> | <b>SCAD_mean</b> | <b>FC</b>   | <b>p_value</b> | <b>FDR</b> |
|-----------|--------------------|------------------|-------------|----------------|------------|
| K01610    | 0.004679962        | 0.002573922      | 0.549987805 | 1.81E-09       | 1.96E-06   |
| K05808    | 0.000167167        | 0.000833879      | 4.988298054 | 1.97E-09       | 1.96E-06   |
| K00789    | 0.000413906        | 0.001116522      | 2.69752442  | 6.02E-09       | 3.99E-06   |
| K12573    | 0.002225046        | 0.000726909      | 0.326693768 | 1.23E-08       | 6.12E-06   |
| K01890    | 0.000342993        | 0.001029091      | 3.000325217 | 2.51E-08       | 9.99E-06   |
| K00174    | 0.002421949        | 0.000606131      | 0.250265986 | 3.57E-08       | 1.18E-05   |
| K03060    | 0.000423878        | 0.001233571      | 2.910205872 | 9.53E-08       | 2.60E-05   |
| K00951    | 0.001718506        | 0.000596422      | 0.347058068 | 1.04E-07       | 2.60E-05   |
| K00820    | 0.00042584         | 0.001393546      | 3.272466823 | 1.21E-07       | 2.68E-05   |
| K03524    | 0.000171569        | 0.000642347      | 3.743952838 | 2.03E-07       | 3.66E-05   |
| K00610    | 0.001116096        | 0.000243344      | 0.218031105 | 2.30E-07       | 3.66E-05   |
| K02952    | 0.004430218        | 0.002272277      | 0.512904035 | 2.31E-07       | 3.66E-05   |
| K00997    | 5.28E-05           | 0.000428287      | 8.113700941 | 2.39E-07       | 3.66E-05   |
| K01935    | 1.80E-05           | 0.000350234      | 19.44307935 | 3.93E-07       | 5.58E-05   |
| K03979    | 0.003876106        | 0.002093715      | 0.540159392 | 5.64E-07       | 6.49E-05   |
| K03585    | 0.001209958        | 0.000510704      | 0.422083946 | 5.72E-07       | 6.49E-05   |
| K03215    | 0.000166029        | 0.000607222      | 3.657318403 | 5.85E-07       | 6.49E-05   |
| K01710    | 0.001030075        | 0.000347051      | 0.336918303 | 5.87E-07       | 6.49E-05   |
| K00525    | 0.000115121        | 0.000787486      | 6.840523557 | 6.38E-07       | 6.69E-05   |
| K00873    | 0.001659959        | 0.000506198      | 0.304946057 | 6.74E-07       | 6.71E-05   |
| K01866    | 0.003285313        | 0.001935476      | 0.589129781 | 7.48E-07       | 6.89E-05   |
| K02012    | 8.22E-05           | 0.0005812        | 7.068971025 | 7.62E-07       | 6.89E-05   |
| K07126    | 0.000139757        | 0.001130935      | 8.09216932  | 8.17E-07       | 6.91E-05   |
| K18332    | 0.000946917        | 0.000235905      | 0.249129655 | 8.33E-07       | 6.91E-05   |

|        |             |             |             |          |             |
|--------|-------------|-------------|-------------|----------|-------------|
| K01745 | 7.93E-05    | 0.000611971 | 7.719134279 | 1.07E-06 | 8.50E-05    |
| K02016 | 0.000352295 | 0.000885035 | 2.512198083 | 1.20E-06 | 9.15E-05    |
| K04759 | 0.000337106 | 0.000735927 | 2.18307215  | 1.32E-06 | 9.15E-05    |
| K00239 | 0.000236628 | 0.000907738 | 3.836132312 | 1.41E-06 | 9.15E-05    |
| K06901 | 0.00023488  | 0.000643294 | 2.738824585 | 1.43E-06 | 9.15E-05    |
| K03499 | 0.002615031 | 0.001207184 | 0.461632752 | 1.50E-06 | 9.15E-05    |
| K01889 | 0.002726072 | 0.001380955 | 0.506573294 | 1.52E-06 | 9.15E-05    |
| K18968 | 5.75E-05    | 0.000583088 | 10.13257468 | 1.53E-06 | 9.15E-05    |
| K00826 | 0.001887899 | 0.001042702 | 0.552308008 | 1.54E-06 | 9.15E-05    |
| K02005 | 0.003815066 | 0.000331388 | 0.086862987 | 1.57E-06 | 9.15E-05    |
| K00919 | 3.17E-05    | 0.000337498 | 10.65575287 | 1.63E-06 | 9.15E-05    |
| K01611 | 7.54E-05    | 0.000520828 | 6.908801491 | 1.66E-06 | 9.15E-05    |
| K00962 | 0.00384042  | 0.002275258 | 0.592450391 | 1.76E-06 | 9.47E-05    |
| K03070 | 0.004142592 | 0.002134724 | 0.515311169 | 1.90E-06 | 9.93E-05    |
| K03527 | 0.003975518 | 0.001474048 | 0.37078122  | 2.01E-06 | 0.000102346 |
| K03595 | 0.001252809 | 0.000528666 | 0.421984628 | 2.17E-06 | 0.000107889 |
| K02911 | 0.007763418 | 0.004741498 | 0.6107488   | 2.31E-06 | 0.000111903 |
| K02050 | 0.000265319 | 0.000874582 | 3.296346895 | 2.57E-06 | 0.000116969 |
| K01809 | 0.00090827  | 0.000293927 | 0.323611778 | 2.58E-06 | 0.000116969 |
| K08296 | 6.62E-05    | 0.000519428 | 7.851004909 | 2.64E-06 | 0.000116969 |
| K02042 | 0.000177921 | 0.000571599 | 3.212662549 | 2.65E-06 | 0.000116969 |
| K03183 | 0.002698478 | 0.000891794 | 0.330480231 | 2.79E-06 | 0.000120325 |
| K03294 | 0.001110695 | 0.000343473 | 0.30924117  | 2.84E-06 | 0.000120325 |
| K00912 | 2.28E-05    | 0.000380078 | 16.63523345 | 2.98E-06 | 0.000121877 |
| K06871 | 0.000691218 | 0.000189355 | 0.273944025 | 3.00E-06 | 0.000121877 |
| K00342 | 0.001158844 | 0.000294878 | 0.254459147 | 3.32E-06 | 0.000131968 |

|        |             |             |             |          |             |
|--------|-------------|-------------|-------------|----------|-------------|
| K01091 | 0.000580028 | 0.001207689 | 2.082120334 | 3.50E-06 | 0.000136663 |
| K02954 | 0.005620878 | 0.003123875 | 0.555762856 | 4.23E-06 | 0.000158843 |
| K00566 | 0.00300933  | 0.001707846 | 0.567516822 | 4.23E-06 | 0.000158843 |
| K02342 | 7.14E-05    | 0.000516946 | 7.235875267 | 4.34E-06 | 0.000159888 |
| K07727 | 0.001457192 | 0.000317895 | 0.218156049 | 4.53E-06 | 0.000163608 |
| K02238 | 7.70E-05    | 0.000361332 | 4.693745666 | 4.62E-06 | 0.000163608 |
| K11645 | 0.001072572 | 0.000303879 | 0.283317885 | 4.69E-06 | 0.000163608 |
| K06168 | 0.003131221 | 0.001804044 | 0.576146923 | 4.82E-06 | 0.000165528 |
| K01997 | 0.000329461 | 0.000770023 | 2.337221629 | 5.32E-06 | 0.000171837 |
| K02564 | 0.003384704 | 0.001883847 | 0.556576497 | 5.36E-06 | 0.000171837 |
| K08325 | 0.001005967 | 0.000274653 | 0.273023344 | 5.43E-06 | 0.000171837 |
| K06942 | 0.00109388  | 0.000314224 | 0.287256166 | 5.43E-06 | 0.000171837 |
| K16899 | 0.000247604 | 0.000654251 | 2.642328352 | 5.44E-06 | 0.000171837 |
| K19286 | 0.002181321 | 0.000357027 | 0.163674513 | 5.67E-06 | 0.000174441 |
| K00346 | 0.000662513 | 0.00018994  | 0.286696495 | 5.70E-06 | 0.000174441 |
| K00347 | 0.001926415 | 0.000848308 | 0.440355641 | 5.80E-06 | 0.000175018 |
| K01649 | 0.000149319 | 0.000623654 | 4.17666551  | 6.29E-06 | 0.00018338  |
| K01754 | 0.00070331  | 0.001244269 | 1.769160506 | 6.33E-06 | 0.00018338  |
| K03076 | 0.001227118 | 0.000425267 | 0.346557413 | 6.41E-06 | 0.00018338  |
| K03702 | 0.003032181 | 0.001660594 | 0.547656721 | 6.48E-06 | 0.00018338  |
| K07258 | 0.000161788 | 0.000870397 | 5.379854966 | 6.54E-06 | 0.00018338  |
| K09457 | 0.00011394  | 0.00072884  | 6.396702863 | 6.67E-06 | 0.00018338  |
| K16785 | 0.000787793 | 0.002612522 | 3.316252918 | 6.79E-06 | 0.00018338  |
| K03719 | 0.000154474 | 0.000760272 | 4.921676    | 6.82E-06 | 0.00018338  |
| K06213 | 0.001138758 | 0.000436554 | 0.383359925 | 7.25E-06 | 0.000192333 |
| K01752 | 0.002213446 | 0.000814075 | 0.36778621  | 7.35E-06 | 0.000192333 |

|        |             |             |             |          |             |
|--------|-------------|-------------|-------------|----------|-------------|
| K09761 | 0.000414312 | 0.000996772 | 2.40584724  | 7.74E-06 | 0.000199962 |
| K03430 | 0.001028114 | 0.00030269  | 0.294412604 | 7.99E-06 | 0.000203184 |
| K02028 | 0.000508813 | 0.002202605 | 4.328911482 | 8.07E-06 | 0.000203184 |
| K00761 | 0.00228226  | 0.00123334  | 0.540402699 | 8.38E-06 | 0.000208396 |
| K09458 | 0.000805913 | 0.000230658 | 0.286207105 | 8.79E-06 | 0.000215736 |
| K03615 | 0.000793219 | 0.000261701 | 0.329923546 | 8.89E-06 | 0.000215736 |
| K01929 | 0.000365024 | 0.000827095 | 2.265862857 | 9.04E-06 | 0.000216752 |
| K01995 | 0.00021442  | 0.000632695 | 2.950724101 | 9.45E-06 | 0.000222999 |
| K01012 | 0.000536573 | 0.001149521 | 2.14234062  | 9.53E-06 | 0.000222999 |
| K05837 | 0.000717844 | 0.00022812  | 0.317784667 | 9.64E-06 | 0.000222999 |
| K00339 | 0.001412186 | 0.000451127 | 0.319453061 | 1.05E-05 | 0.000240485 |
| K00426 | 0.000613604 | 0.00020464  | 0.333505238 | 1.06E-05 | 0.000240485 |
| K01883 | 0.002543562 | 0.001427476 | 0.561211619 | 1.08E-05 | 0.00024117  |
| K03589 | 8.32E-05    | 0.000545412 | 6.556988643 | 1.10E-05 | 0.00024117  |
| K19271 | 0.001286928 | 0.000400442 | 0.311160829 | 1.11E-05 | 0.00024117  |
| K01719 | 0.001020923 | 0.00032401  | 0.317369342 | 1.11E-05 | 0.00024117  |
| K03561 | 5.60E-05    | 0.000403575 | 7.208415182 | 1.14E-05 | 0.000243914 |
| K13993 | 0.00015201  | 0.000763916 | 5.025437982 | 1.20E-05 | 0.000253497 |
| K00817 | 0.000220393 | 0.000871935 | 3.956270702 | 1.23E-05 | 0.000255569 |
| K01818 | 0.001132982 | 0.000373377 | 0.329552567 | 1.23E-05 | 0.000255569 |
| K02393 | 2.83E-05    | 0.000222406 | 7.85791495  | 1.25E-05 | 0.000256156 |
| K02387 | 7.33E-05    | 0.000311644 | 4.252048941 | 1.28E-05 | 0.000256384 |
| K00341 | 0.001104697 | 0.000321343 | 0.290887767 | 1.28E-05 | 0.000256384 |
| K02551 | 0.000776912 | 0.000261566 | 0.336674445 | 1.29E-05 | 0.000256384 |
| K10947 | 0.000475135 | 0.001242801 | 2.615677465 | 1.31E-05 | 0.000258768 |
| K00625 | 0.000824385 | 0.000269348 | 0.326726129 | 1.34E-05 | 0.000258768 |

|        |             |             |             |          |             |
|--------|-------------|-------------|-------------|----------|-------------|
| K00768 | 5.78E-05    | 0.000373272 | 6.453291774 | 1.34E-05 | 0.000258768 |
| K02437 | 0.001003266 | 0.000382413 | 0.38116856  | 1.44E-05 | 0.00027509  |
| K03799 | 0.000161244 | 0.000527269 | 3.270011046 | 1.46E-05 | 0.00027509  |
| K00765 | 0.002010421 | 0.001108186 | 0.551220867 | 1.47E-05 | 0.00027509  |
| K00954 | 0.000232509 | 0.000557279 | 2.396809853 | 1.48E-05 | 0.00027509  |
| K03210 | 0.000647029 | 0.000320135 | 0.494777747 | 1.53E-05 | 0.000281163 |
| K01734 | 0.000237591 | 0.000792445 | 3.335332146 | 1.59E-05 | 0.00028726  |
| K02622 | 0.000855789 | 0.000334035 | 0.390324386 | 1.60E-05 | 0.00028726  |
| K03565 | 0.000169376 | 0.000570574 | 3.368673096 | 1.60E-05 | 0.00028726  |
| K00760 | 0.000180023 | 0.000520005 | 2.888554899 | 1.66E-05 | 0.000294859 |
| K03470 | 0.000165527 | 0.000430447 | 2.600466074 | 1.74E-05 | 0.000306087 |
| K01464 | 0.000109527 | 0.000597424 | 5.454588495 | 1.76E-05 | 0.000306989 |
| K00721 | 0.000614934 | 0.000181885 | 0.295780192 | 1.78E-05 | 0.000307886 |
| K01425 | 0.000608686 | 0.00018859  | 0.309831795 | 1.86E-05 | 0.000319658 |
| K13953 | 2.21E-05    | 0.000219817 | 9.964339695 | 1.90E-05 | 0.000321372 |
| K15553 | 1.54E-05    | 0.000147219 | 9.578922247 | 1.92E-05 | 0.000321372 |
| K02510 | 1.08E-05    | 0.000156244 | 14.50067495 | 1.92E-05 | 0.000321372 |
| K03705 | 0.00015322  | 0.000413791 | 2.70063453  | 1.95E-05 | 0.000323069 |
| K02493 | 6.55E-05    | 0.000428713 | 6.546750974 | 2.02E-05 | 0.000331604 |
| K00548 | 8.38E-05    | 0.000415008 | 4.951106391 | 2.21E-05 | 0.000359762 |
| K02398 | 0.000116809 | 0.000457328 | 3.915193801 | 2.27E-05 | 0.000364949 |
| K02913 | 0.011157797 | 0.005612119 | 0.502977368 | 2.27E-05 | 0.000364949 |
| K19954 | 1.73E-05    | 0.000169132 | 9.772241085 | 2.31E-05 | 0.000367454 |
| K02407 | 0.000235779 | 0.000630484 | 2.674047259 | 2.35E-05 | 0.000370508 |
| K07447 | 0.001343474 | 0.000695851 | 0.517949121 | 2.39E-05 | 0.000374281 |
| K02338 | 0.000785741 | 0.000361323 | 0.459849555 | 2.45E-05 | 0.000380428 |

|        |             |             |             |          |             |
|--------|-------------|-------------|-------------|----------|-------------|
| K22024 | 1.95E-05    | 0.000170202 | 8.741378607 | 2.47E-05 | 0.000380637 |
| K07056 | 5.06E-05    | 0.000355406 | 7.029021416 | 2.50E-05 | 0.000382136 |
| K01938 | 0.000711882 | 0.000363979 | 0.511290977 | 2.59E-05 | 0.000391079 |
| K09936 | 0.000256226 | 9.35E-05    | 0.364973795 | 2.59E-05 | 0.000391079 |
| K03523 | 0.000244246 | 0.000778247 | 3.186330824 | 2.68E-05 | 0.000401292 |
| K01956 | 0.000148727 | 0.000401108 | 2.696951174 | 2.71E-05 | 0.000401292 |
| K03771 | 0.000456164 | 0.000103965 | 0.227910747 | 2.72E-05 | 0.000401292 |
| K02041 | 0.000204455 | 0.000612352 | 2.995044039 | 2.81E-05 | 0.00041101  |
| K00177 | 0.000884312 | 0.000230788 | 0.260980643 | 2.86E-05 | 0.000413723 |
| K01749 | 5.52E-05    | 0.000384183 | 6.95941392  | 2.87E-05 | 0.000413723 |
| K00042 | 9.98E-05    | 0.000523222 | 5.24301191  | 3.03E-05 | 0.000433256 |
| K00249 | 4.01E-05    | 0.00023339  | 5.817806613 | 3.09E-05 | 0.000436303 |
| K02769 | 0.000220253 | 0.000804661 | 3.653358166 | 3.12E-05 | 0.000436303 |
| K22025 | 1.88E-05    | 0.000213175 | 11.35834235 | 3.16E-05 | 0.000436303 |
| K05577 | 0.000124562 | 0.000590445 | 4.740181854 | 3.18E-05 | 0.000436303 |
| K03150 | 0.000857032 | 0.00030255  | 0.353020363 | 3.20E-05 | 0.000436303 |
| K02879 | 0.002722753 | 0.001534488 | 0.563579775 | 3.23E-05 | 0.000436303 |
| K02963 | 0.005317551 | 0.003579337 | 0.673117663 | 3.23E-05 | 0.000436303 |
| K07659 | 1.77E-05    | 0.000213641 | 12.07390875 | 3.24E-05 | 0.000436303 |
| K01998 | 0.000264002 | 0.000698395 | 2.645417078 | 3.24E-05 | 0.000436303 |
| K03320 | 0.000157556 | 0.000640117 | 4.062789138 | 3.35E-05 | 0.000448047 |
| K00930 | 0.003143571 | 0.00170917  | 0.54370335  | 3.45E-05 | 0.000456389 |
| K00337 | 0.001209864 | 0.000438487 | 0.362426341 | 3.46E-05 | 0.000456389 |
| K01999 | 0.000236952 | 0.000953675 | 4.024765473 | 3.57E-05 | 0.000467319 |
| K06158 | 0.000217115 | 0.000673208 | 3.100693291 | 3.65E-05 | 0.000474785 |
| K02838 | 0.002311754 | 0.001345723 | 0.582122245 | 3.68E-05 | 0.000475791 |

|        |             |             |             |          |             |
|--------|-------------|-------------|-------------|----------|-------------|
| K14188 | 7.08E-05    | 0           | 0           | 3.76E-05 | 0.000482499 |
| K01034 | 3.39E-05    | 0.000226722 | 6.695980909 | 3.83E-05 | 0.000488096 |
| K02470 | 0.000285358 | 0.000135412 | 0.474536044 | 3.87E-05 | 0.000489489 |
| K02469 | 0.000169027 | 0.000413191 | 2.444528116 | 3.89E-05 | 0.000489489 |
| K07302 | 9.52E-06    | 0.000161281 | 16.94392206 | 3.95E-05 | 0.000492927 |
| K13930 | 0           | 0.000127929 | inf         | 3.96E-05 | 0.000492927 |
| K01515 | 0.00021037  | 0.000724809 | 3.445398666 | 3.99E-05 | 0.00049371  |
| K07028 | 3.83E-05    | 0.000214998 | 5.606369459 | 4.09E-05 | 0.000500346 |
| K02990 | 0.002988716 | 0.001691579 | 0.565988691 | 4.10E-05 | 0.000500346 |
| K07726 | 3.13E-05    | 0.001239069 | 39.64724578 | 4.12E-05 | 0.000500346 |
| K01951 | 0.005121816 | 0.003038183 | 0.593184839 | 4.19E-05 | 0.000505506 |
| K01491 | 0.003257933 | 0.001929555 | 0.592263452 | 4.28E-05 | 0.000513349 |
| K03564 | 0.000515308 | 0.000199888 | 0.387899822 | 4.40E-05 | 0.000523814 |
| K19784 | 5.99E-05    | 0.000448118 | 7.476491445 | 4.47E-05 | 0.000525071 |
| K03149 | 0.000190801 | 0.000762626 | 3.996973099 | 4.49E-05 | 0.000525071 |
| K14338 | 1.83E-05    | 0.0001714   | 9.385197778 | 4.51E-05 | 0.000525071 |
| K02048 | 3.34E-05    | 0.000215286 | 6.454439809 | 4.51E-05 | 0.000525071 |
| K08363 | 0.000133274 | 0.000737739 | 5.535495292 | 4.70E-05 | 0.000543843 |
| K01687 | 0.003994663 | 0.002574865 | 0.644576181 | 4.77E-05 | 0.000548301 |
| K00632 | 2.46E-05    | 0.000144943 | 5.885278919 | 4.84E-05 | 0.000553358 |
| K01129 | 0.000173464 | 0.000413235 | 2.382243614 | 4.91E-05 | 0.000556182 |
| K01297 | 8.91E-05    | 0.000482553 | 5.418488894 | 4.92E-05 | 0.000556182 |
| K01270 | 0.000694201 | 0.000209128 | 0.301249388 | 4.98E-05 | 0.000557766 |
| K16203 | 8.91E-06    | 0.000130891 | 14.68657017 | 4.99E-05 | 0.000557766 |
| K03594 | 0.000523321 | 0.000154457 | 0.295148088 | 5.02E-05 | 0.000557766 |
| K03666 | 1.07E-05    | 0.000161611 | 15.11329127 | 5.08E-05 | 0.000561721 |

|        |             |             |             |          |             |
|--------|-------------|-------------|-------------|----------|-------------|
| K15268 | 1.50E-05    | 0.000167634 | 11.16600199 | 5.15E-05 | 0.00056377  |
| K02575 | 2.03E-05    | 0.000129243 | 6.367721071 | 5.16E-05 | 0.00056377  |
| K01567 | 0.000154594 | 0.000413944 | 2.677621783 | 5.28E-05 | 0.000571646 |
| K06989 | 0.000202448 | 0.000564323 | 2.787489523 | 5.30E-05 | 0.000571646 |
| K01770 | 0.001208596 | 0.00065299  | 0.54028816  | 5.31E-05 | 0.000571646 |
| K03500 | 7.58E-05    | 0.000379491 | 5.009451921 | 5.38E-05 | 0.000575273 |
| K11529 | 2.92E-05    | 0.000178208 | 6.10802868  | 5.48E-05 | 0.0005836   |
| K18220 | 0.005169184 | 0.003082427 | 0.596308204 | 5.53E-05 | 0.000585603 |
| K03981 | 1.85E-05    | 0.00014067  | 7.589416627 | 5.56E-05 | 0.000585875 |
| K13789 | 0.000341335 | 0.00086706  | 2.540204581 | 5.76E-05 | 0.000602392 |
| K03654 | 7.55E-05    | 0.00034786  | 4.605808091 | 5.78E-05 | 0.000602392 |
| K00626 | 0.000104395 | 0.000373959 | 3.582150636 | 5.93E-05 | 0.000614529 |
| K02227 | 0.000174427 | 0.000482932 | 2.768686007 | 5.98E-05 | 0.000615728 |
| K06162 | 2.32E-05    | 0.000136608 | 5.89507193  | 6.00E-05 | 0.000615728 |
| K01295 | 2.80E-05    | 0.000155772 | 5.56775686  | 6.03E-05 | 0.000615728 |
| K03091 | 0.000487201 | 0.001018668 | 2.090855611 | 6.10E-05 | 0.000616025 |
| K02114 | 0.000554984 | 0.001369574 | 2.467773152 | 6.10E-05 | 0.000616025 |
| K00946 | 0.001114325 | 0.00053588  | 0.480901278 | 6.17E-05 | 0.00062061  |
| K02057 | 0.000670968 | 0.001656019 | 2.468105229 | 6.26E-05 | 0.000626263 |
| K00645 | 0.001318433 | 0.000279115 | 0.211701768 | 6.38E-05 | 0.000634876 |
| K12960 | 0.00018856  | 0.000567699 | 3.010705383 | 6.42E-05 | 0.0006352   |
| K09939 | 2.71E-05    | 0.000191634 | 7.0643784   | 6.48E-05 | 0.000638047 |
| K01262 | 0.000576524 | 0.000239002 | 0.414556564 | 6.53E-05 | 0.00063893  |
| K03667 | 0.00010744  | 0.000481135 | 4.478188819 | 6.55E-05 | 0.00063893  |
| K11069 | 0.000261016 | 0.000627017 | 2.402219114 | 6.60E-05 | 0.00064084  |
| K02017 | 0.000128541 | 0.000526816 | 4.098430085 | 6.77E-05 | 0.000652343 |



|        |             |             |             |          |             |
|--------|-------------|-------------|-------------|----------|-------------|
| K13542 | 0.000320122 | 8.49E-05    | 0.265141009 | 6.81E-05 | 0.000652343 |
| K00241 | 0.00112584  | 0.000428529 | 0.38063072  | 6.85E-05 | 0.000652343 |
| K08224 | 2.66E-05    | 0.000171092 | 6.44123486  | 6.85E-05 | 0.000652343 |
| K00286 | 8.87E-05    | 0.000467112 | 5.264180467 | 6.88E-05 | 0.000652343 |
| K06217 | 0.002606152 | 0.001072942 | 0.411695862 | 7.00E-05 | 0.00066015  |
| K01879 | 0.000102695 | 0.000462761 | 4.506164632 | 7.04E-05 | 0.000661228 |
| K09822 | 0.000130217 | 0.000595616 | 4.574023743 | 7.08E-05 | 0.000661913 |
| K07396 | 1.07E-05    | 0.000123015 | 11.45798509 | 7.30E-05 | 0.000678884 |
| K02400 | 4.31E-05    | 0.000227559 | 5.281046459 | 7.37E-05 | 0.000681803 |
| K00013 | 0.001197622 | 0.000569477 | 0.475506673 | 7.45E-05 | 0.000686608 |
| K01438 | 0.000622171 | 0.000222612 | 0.357798675 | 7.74E-05 | 0.0007102   |
| K06134 | 2.61E-05    | 0.000173764 | 6.65821666  | 7.86E-05 | 0.000717687 |
| K06145 | 2.93E-05    | 0.000200015 | 6.819857407 | 7.94E-05 | 0.000718598 |
| K02010 | 3.75E-05    | 0.000241755 | 6.440097606 | 7.94E-05 | 0.000718598 |
| K03464 | 1.96E-05    | 0.000196433 | 9.999322682 | 8.11E-05 | 0.000723751 |
| K00135 | 2.05E-05    | 0.000133347 | 6.520608611 | 8.11E-05 | 0.000723751 |
| K03270 | 3.32E-05    | 0.000196204 | 5.916176683 | 8.11E-05 | 0.000723751 |
| K07001 | 6.92E-05    | 0.00038794  | 5.606635204 | 8.37E-05 | 0.000743163 |
| K00029 | 0.000269983 | 6.88E-05    | 0.254910895 | 8.71E-05 | 0.000769951 |
| K02008 | 0           | 0.000284534 | inf         | 8.75E-05 | 0.000769951 |
| K07397 | 3.10E-05    | 0.000225826 | 7.276428836 | 8.82E-05 | 0.000769951 |
| K07004 | 1.01E-05    | 0.000103381 | 10.21581408 | 8.82E-05 | 0.000769951 |
| K07491 | 0.000170919 | 0.000645689 | 3.77774315  | 9.18E-05 | 0.000794888 |
| K07588 | 0.001144925 | 0.000440241 | 0.384515159 | 9.19E-05 | 0.000794888 |
| K09011 | 0.000541962 | 0.00014351  | 0.264797477 | 9.27E-05 | 0.000797187 |
| K02967 | 0.002881721 | 0.001887745 | 0.65507551  | 9.33E-05 | 0.000797187 |

|        |             |             |             |             |             |
|--------|-------------|-------------|-------------|-------------|-------------|
| K13292 | 0.000267737 | 0.000556562 | 2.078760447 | 9.33E-05    | 0.000797187 |
| K01419 | 0.000120095 | 0.000490974 | 4.08820078  | 9.41E-05    | 0.000800297 |
| K09788 | 4.04E-05    | 0.000236404 | 5.846011858 | 9.59E-05    | 0.000811868 |
| K11754 | 0.000244128 | 0.000776553 | 3.180921028 | 9.69E-05    | 0.00081691  |
| K10563 | 0.00010939  | 0.000455502 | 4.164003597 | 9.80E-05    | 0.00081985  |
| K06001 | 2.08E-05    | 0.000348345 | 16.71858728 | 9.82E-05    | 0.00081985  |
| K02347 | 4.13E-05    | 0.000228265 | 5.521112865 | 9.85E-05    | 0.00081985  |
| K02874 | 0.004930023 | 0.003365627 | 0.682679753 | 9.92E-05    | 0.000822813 |
| K07114 | 0.000976968 | 0.000504541 | 0.516435832 | 0.000101521 | 0.000838282 |
| K02480 | 2.49E-05    | 0.000170316 | 6.839178588 | 0.000103163 | 0.000845486 |
| K18682 | 0.002035031 | 0.001228044 | 0.603452376 | 0.000103277 | 0.000845486 |
| K00457 | 4.24E-05    | 0.000180318 | 4.255142911 | 0.000103668 | 0.000845486 |
| K03717 | 0.000140535 | 0.000575354 | 4.094035695 | 0.000105839 | 0.000859668 |
| K17324 | 2.92E-05    | 0.000155715 | 5.327270742 | 0.000108533 | 0.000877969 |
| K01056 | 0.000861657 | 0.000485825 | 0.563826163 | 0.000109881 | 0.000882119 |
| K02906 | 0.004429433 | 0.003119444 | 0.704253589 | 0.000109932 | 0.000882119 |
| K22468 | 4.06E-05    | 0.000199231 | 4.906648451 | 0.000110441 | 0.000882639 |
| K05810 | 0.000294477 | 0.000565749 | 1.921196749 | 0.000112424 | 0.000893702 |
| K01479 | 1.45E-05    | 8.76E-05    | 6.041863563 | 0.000112723 | 0.000893702 |
| K03458 | 4.89E-05    | 0.000345654 | 7.072613529 | 0.000114094 | 0.000900983 |
| K10907 | 0.000290889 | 0.001049099 | 3.606531629 | 0.000115587 | 0.000909162 |
| K00287 | 0.00021777  | 0.000592752 | 2.721915276 | 0.000116366 | 0.000911685 |
| K03773 | 0.000401785 | 0.000154832 | 0.385361015 | 0.000119425 | 0.000931981 |
| K02986 | 0.002921899 | 0.001847826 | 0.632405972 | 0.000121713 | 0.000946127 |
| K07666 | 3.19E-05    | 0.000189612 | 5.946511649 | 0.000123782 | 0.000954154 |
| K02420 | 8.68E-05    | 0.000302025 | 3.480907564 | 0.00012432  | 0.000954154 |

|        |             |             |             |             |             |
|--------|-------------|-------------|-------------|-------------|-------------|
| K00176 | 0.001014152 | 0.000367539 | 0.362410388 | 0.000125052 | 0.000954154 |
| K13043 | 2.25E-05    | 0.00031972  | 14.23586379 | 0.000126046 | 0.000954154 |
| K13774 | 2.22E-05    | 0.000169543 | 7.630462848 | 0.000126102 | 0.000954154 |
| K03412 | 2.61E-05    | 0.000164214 | 6.296770745 | 0.000126102 | 0.000954154 |
| K05539 | 1.86E-05    | 0.000141053 | 7.577689855 | 0.000126102 | 0.000954154 |
| K01912 | 0.001346386 | 0.000627819 | 0.46629931  | 0.000130355 | 0.000980105 |
| K07642 | 4.53E-05    | 0.00022107  | 4.885360033 | 0.000131009 | 0.000980105 |
| K01574 | 4.64E-05    | 0.000238157 | 5.130131904 | 0.000131009 | 0.000980105 |
| K08738 | 1.51E-05    | 0.000202471 | 13.37681096 | 0.00013235  | 0.000986431 |
| K00278 | 0.000110191 | 0.000460823 | 4.182049284 | 0.000133105 | 0.000986585 |
| K00097 | 0.000540933 | 0.000203689 | 0.376551267 | 0.000134143 | 0.000986585 |
| K13873 | 1.52E-05    | 9.97E-05    | 6.538104641 | 0.000134446 | 0.000986585 |
| K11717 | 0.000558583 | 0.000212613 | 0.380629445 | 0.000134629 | 0.000986585 |
| K07234 | 2.56E-05    | 0.000169357 | 6.622843941 | 0.00013485  | 0.000986585 |
| K04041 | 0.000151952 | 0.000393469 | 2.58942581  | 0.000137125 | 0.000999553 |
| K03182 | 2.94E-05    | 0.000153288 | 5.213173351 | 0.000138606 | 0.001006666 |
| K02110 | 0.000560494 | 0.001473341 | 2.628647232 | 0.000140473 | 0.001016511 |
| K03168 | 0.000162606 | 0.000518011 | 3.185692774 | 0.000141408 | 0.001017529 |
| K01142 | 0.000140575 | 0.000618914 | 4.402735779 | 0.000142184 | 0.001017529 |
| K09461 | 4.97E-05    | 0.000240196 | 4.833587693 | 0.000142334 | 0.001017529 |
| K10541 | 0.000110636 | 0.000298583 | 2.698783322 | 0.000142659 | 0.001017529 |
| K01448 | 0.000115136 | 0.000601313 | 5.222634767 | 0.000145754 | 0.001031789 |
| K11065 | 2.22E-05    | 0.00016718  | 7.51714559  | 0.000146332 | 0.001031789 |
| K01255 | 1.11E-05    | 0.000112121 | 10.13333814 | 0.000146666 | 0.001031789 |
| K01993 | 1.79E-05    | 0.000161154 | 8.983411407 | 0.000146732 | 0.001031789 |
| K00285 | 7.50E-05    | 0.000320376 | 4.270504431 | 0.000149972 | 0.00105086  |

|        |             |             |             |             |             |
|--------|-------------|-------------|-------------|-------------|-------------|
| K19340 | 3.00E-05    | 0.000186092 | 6.205969209 | 0.000153918 | 0.001067898 |
| K00651 | 0.002943666 | 0.002038739 | 0.692585218 | 0.000155016 | 0.001067898 |
| K04043 | 0.003652286 | 0.002273918 | 0.622601275 | 0.000155023 | 0.001067898 |
| K03273 | 2.49E-05    | 0.000162857 | 6.552473695 | 0.000156622 | 0.001067898 |
| K02563 | 2.65E-05    | 0.000187345 | 7.076682158 | 0.000156622 | 0.001067898 |
| K13932 | 4.34E-05    | 0.000250333 | 5.770809459 | 0.000156776 | 0.001067898 |
| K01595 | 2.75E-05    | 0.000137403 | 4.998275405 | 0.000156776 | 0.001067898 |
| K18369 | 4.28E-05    | 0.000267633 | 6.246105481 | 0.000156776 | 0.001067898 |
| K00991 | 0.000270845 | 0.000471705 | 1.741606558 | 0.000157647 | 0.001067898 |
| K01736 | 0.002720005 | 0.001727057 | 0.634946114 | 0.000158156 | 0.001067898 |
| K00059 | 0.000495451 | 0.000197803 | 0.399238687 | 0.000158306 | 0.001067898 |
| K00791 | 8.69E-05    | 0.000344173 | 3.962439311 | 0.000159344 | 0.001071267 |
| K10763 | 2.93E-05    | 0.000189422 | 6.468519963 | 0.000162625 | 0.001089645 |
| K03569 | 0.00017729  | 0.000628891 | 3.547254448 | 0.000164039 | 0.001092078 |
| K03411 | 4.60E-05    | 0.000226131 | 4.912852056 | 0.000164086 | 0.001092078 |
| K00759 | 0.001766285 | 0.000854361 | 0.483704893 | 0.000166196 | 0.001102433 |
| K01733 | 0.00017572  | 0.000417163 | 2.374021616 | 0.000167126 | 0.001104919 |
| K02081 | 3.98E-05    | 1.83E-06    | 0.04603793  | 0.000175346 | 0.001149469 |
| K01465 | 0.000226829 | 0.000531669 | 2.343918836 | 0.000175551 | 0.001149469 |
| K00179 | 3.14E-05    | 0.000404498 | 12.89762757 | 0.000175597 | 0.001149469 |
| K19745 | 2.76E-05    | 0.000156946 | 5.677568742 | 0.000180695 | 0.001176479 |
| K21010 | 2.31E-05    | 0.00013099  | 5.674908049 | 0.000180906 | 0.001176479 |
| K11755 | 3.52E-05    | 0.000381861 | 10.84525857 | 0.000182002 | 0.001179754 |
| K03518 | 0.000117098 | 0.000517745 | 4.421466346 | 0.000187232 | 0.001202033 |
| K04562 | 3.54E-05    | 0.00020379  | 5.750653917 | 0.000187335 | 0.001202033 |
| K03924 | 0.000372454 | 0.00017285  | 0.464083299 | 0.000187829 | 0.001202033 |

|        |             |             |             |             |             |
|--------|-------------|-------------|-------------|-------------|-------------|
| K11209 | 5.28E-05    | 0.0002621   | 4.965727526 | 0.000187855 | 0.001202033 |
| K02233 | 0.000242389 | 0.000484056 | 1.997024065 | 0.000188762 | 0.001203963 |
| K00979 | 7.77E-06    | 9.92E-05    | 12.76679602 | 0.000192264 | 0.001215922 |
| K03625 | 0.000903815 | 0.000536625 | 0.593733816 | 0.00019312  | 0.001215922 |
| K06075 | 0           | 0.000281942 | inf         | 0.000193702 | 0.001215922 |
| K07149 | 0           | 9.72E-05    | inf         | 0.000193702 | 0.001215922 |
| K15726 | 4.82E-05    | 0.000182081 | 3.776831876 | 0.000194303 | 0.001215922 |
| K01531 | 5.28E-05    | 0.000203947 | 3.863087947 | 0.000194303 | 0.001215922 |
| K06394 | 0.000185745 | 0.000452237 | 2.434716723 | 0.000195216 | 0.001217808 |
| K03535 | 0.000146332 | 0.000630912 | 4.311512446 | 0.000195886 | 0.001218163 |
| K02036 | 0.000310614 | 0.000639315 | 2.05822871  | 0.000197021 | 0.001221409 |
| K03406 | 0.000437366 | 0.001105177 | 2.526889025 | 0.000198226 | 0.001224086 |
| K03710 | 0.000106567 | 0.00038928  | 3.652922207 | 0.000198824 | 0.001224086 |
| K11103 | 8.10E-05    | 0.000294293 | 3.635360839 | 0.000199383 | 0.001224086 |
| K03776 | 3.72E-05    | 0.000211998 | 5.69566013  | 0.000199914 | 0.001224086 |
| K00681 | 2.42E-05    | 0.000312228 | 12.89750876 | 0.000201195 | 0.001225141 |
| K00975 | 0.000430542 | 0.00095003  | 2.20658888  | 0.000201317 | 0.001225141 |
| K12262 | 0.000122762 | 0.000508186 | 4.139603044 | 0.000204534 | 0.001235654 |
| K06919 | 0.000339851 | 0.000842167 | 2.478045701 | 0.000204576 | 0.001235654 |
| K07645 | 3.82E-05    | 0.000158659 | 4.158309891 | 0.000204907 | 0.001235654 |
| K00133 | 0.001320728 | 0.000792803 | 0.600277705 | 0.000208758 | 0.001251317 |
| K02968 | 0.003648376 | 0.002576335 | 0.70615931  | 0.000208762 | 0.001251317 |
| K06317 | 0.000199336 | 0.000701161 | 3.51748819  | 0.000210898 | 0.001260323 |
| K03554 | 4.09E-05    | 0.000190205 | 4.651994081 | 0.000211654 | 0.001261052 |
| K02072 | 2.97E-05    | 0.000162169 | 5.458664963 | 0.00021323  | 0.001266647 |
| K02567 | 3.38E-05    | 0.000150611 | 4.452654362 | 0.00021651  | 0.001281389 |

|        |             |             |             |             |             |
|--------|-------------|-------------|-------------|-------------|-------------|
| K16787 | 0.000447357 | 0.001170165 | 2.615727804 | 0.000216999 | 0.001281389 |
| K06142 | 6.22E-05    | 0.000284695 | 4.576408399 | 0.000221863 | 0.001302837 |
| K00248 | 6.80E-05    | 0.000188169 | 2.766454376 | 0.000221941 | 0.001302837 |
| K03563 | 0.000201918 | 0.000484996 | 2.401950373 | 0.000223502 | 0.001308141 |
| K01251 | 4.65E-05    | 0.00024106  | 5.182839836 | 0.000224658 | 0.001311057 |
| K13875 | 2.59E-05    | 0.000136707 | 5.27051232  | 0.000227431 | 0.001323356 |
| K00455 | 1.90E-05    | 0.00014132  | 7.428744721 | 0.000228195 | 0.001323929 |
| K02770 | 0.000282193 | 0.000807392 | 2.861139457 | 0.000229285 | 0.001326386 |
| K03772 | 1.80E-05    | 0.000158646 | 8.797718648 | 0.000235362 | 0.001357598 |
| K04091 | 9.84E-05    | 0.000363555 | 3.694896966 | 0.000238347 | 0.001366969 |
| K07649 | 5.04E-05    | 0.000252447 | 5.008656981 | 0.000238361 | 0.001366969 |
| K03040 | 0.00210728  | 0.001494032 | 0.708986045 | 0.000239162 | 0.001367622 |
| K03644 | 0.000725668 | 0.000349945 | 0.482237532 | 0.000242143 | 0.001380699 |
| K03340 | 1.98E-05    | 0.000281946 | 14.26067137 | 0.000243623 | 0.001384314 |
| K01845 | 3.60E-05    | 0.000203784 | 5.668139495 | 0.000244385 | 0.001384314 |
| K00845 | 0.001272695 | 0.000428567 | 0.336739359 | 0.000244872 | 0.001384314 |
| K09975 | 1.38E-05    | 0.000140035 | 10.12275625 | 0.000245559 | 0.001384314 |
| K13928 | 6.29E-05    | 0.000232373 | 3.691650042 | 0.000250738 | 0.001409516 |
| K21420 | 2.70E-05    | 0.000146591 | 5.435366166 | 0.000257043 | 0.00143573  |
| K07105 | 0.000112495 | 0.000300255 | 2.669053478 | 0.000257505 | 0.00143573  |
| K02217 | 0.001495953 | 0.000259309 | 0.173340326 | 0.000257566 | 0.00143573  |
| K02863 | 0.002738097 | 0.001844496 | 0.673641734 | 0.000258809 | 0.001438631 |
| K13483 | 8.70E-06    | 9.68E-05    | 11.12396462 | 0.000259658 | 0.001439332 |
| K09903 | 0.001737196 | 0.001005657 | 0.578896915 | 0.000263854 | 0.001454431 |
| K02160 | 2.79E-05    | 0.000155128 | 5.559988138 | 0.000264487 | 0.001454431 |
| K00937 | 0.000256023 | 0.000501462 | 1.958659821 | 0.000264575 | 0.001454431 |

|        |             |             |             |             |             |
|--------|-------------|-------------|-------------|-------------|-------------|
| K05275 | 5.82E-05    | 0.0002213   | 3.805040984 | 0.000269377 | 0.001472694 |
| K00281 | 3.74E-05    | 0.000161701 | 4.32875654  | 0.000269377 | 0.001472694 |
| K00558 | 0.000484062 | 0.001711506 | 3.535712304 | 0.000274399 | 0.00149604  |
| K03809 | 2.86E-05    | 0.000148821 | 5.211556325 | 0.000275546 | 0.001498185 |
| K01118 | 8.93E-05    | 0.000416991 | 4.670226941 | 0.000284368 | 0.001537808 |
| K11068 | 3.82E-05    | 0.000172986 | 4.532250677 | 0.000284379 | 0.001537808 |
| K02026 | 0.000360586 | 0.000895385 | 2.48313782  | 0.000286608 | 0.001545665 |
| K01007 | 6.06E-05    | 0.000224591 | 3.703789163 | 0.000291632 | 0.001562875 |
| K15727 | 5.45E-05    | 0.000190458 | 3.495628004 | 0.000291632 | 0.001562875 |
| K01805 | 2.20E-05    | 0.000238893 | 10.86493201 | 0.000293404 | 0.001562875 |
| K03630 | 0.000277513 | 0.000643797 | 2.31988004  | 0.000294233 | 0.001562875 |
| K00574 | 2.62E-05    | 0.000143112 | 5.456004639 | 0.000295132 | 0.001562875 |
| K01599 | 2.61E-05    | 0.000139358 | 5.349013493 | 0.000295297 | 0.001562875 |
| K08994 | 3.48E-05    | 0.000187917 | 5.392830589 | 0.000295297 | 0.001562875 |
| K02113 | 0.000431253 | 0.000803105 | 1.86225973  | 0.000297422 | 0.001569944 |
| K02283 | 4.80E-05    | 0.000175853 | 3.663550023 | 0.000298866 | 0.001573397 |
| K07574 | 0.000223797 | 0.000682694 | 3.050508034 | 0.000300339 | 0.001576976 |
| K06136 | 5.67E-05    | 0.00024124  | 4.251485144 | 0.000301403 | 0.001578401 |
| K03521 | 6.58E-05    | 0.000184147 | 2.799315207 | 0.000311125 | 0.001622563 |
| K05816 | 1.45E-05    | 0.000103051 | 7.103759535 | 0.000311467 | 0.001622563 |
| K11071 | 0.000192796 | 0.00056926  | 2.952654823 | 0.000312373 | 0.001623035 |
| K04516 | 0.000977485 | 0.000304094 | 0.311098459 | 0.000314381 | 0.001625343 |
| K07088 | 0.000698019 | 0.001823323 | 2.612140428 | 0.000314826 | 0.001625343 |
| K01706 | 2.34E-05    | 0.000118356 | 5.066069039 | 0.000316098 | 0.001625343 |
| K01061 | 8.00E-05    | 0.000296165 | 3.703743176 | 0.000316725 | 0.001625343 |
| K05595 | 0.000937316 | 0.000242458 | 0.258673073 | 0.000317165 | 0.001625343 |

|        |             |             |             |             |             |
|--------|-------------|-------------|-------------|-------------|-------------|
| K07130 | 6.02E-06    | 8.14E-05    | 13.53132023 | 0.000317718 | 0.001625343 |
| K00928 | 0.000406372 | 0.000108714 | 0.26752323  | 0.000318989 | 0.001627661 |
| K10001 | 0.00011222  | 0.000429152 | 3.824211713 | 0.00032228  | 0.001635931 |
| K03670 | 0.000105793 | 0.000392845 | 3.713350751 | 0.00032228  | 0.001635931 |
| K06041 | 0.001934468 | 0.000493033 | 0.254867497 | 0.000323076 | 0.001635931 |
| K12527 | 2.95E-05    | 0.00031478  | 10.68558376 | 0.000324592 | 0.001639438 |
| K00748 | 1.72E-05    | 0.000105144 | 6.098730161 | 0.000328741 | 0.001656189 |
| K03694 | 3.42E-05    | 0.000171698 | 5.023084116 | 0.000333154 | 0.001662475 |
| K00128 | 2.60E-05    | 0.00014295  | 5.506011219 | 0.000333916 | 0.001662475 |
| K19166 | 2.85E-05    | 0.000152024 | 5.339992075 | 0.000333916 | 0.001662475 |
| K00766 | 0.001077838 | 0.000553876 | 0.513877069 | 0.000334016 | 0.001662475 |
| K08678 | 5.66E-05    | 0.000246137 | 4.351696551 | 0.000334166 | 0.001662475 |
| K01926 | 0.000810059 | 0.000462966 | 0.571521118 | 0.000337655 | 0.001675643 |
| K01684 | 3.66E-05    | 0.000150303 | 4.109349038 | 0.000338834 | 0.001677311 |
| K10670 | 0.000105331 | 1.10E-05    | 0.104833683 | 0.000340436 | 0.001681063 |
| K02313 | 0.001406773 | 0.000910608 | 0.647302522 | 0.000345317 | 0.001700943 |
| K00891 | 0.000303273 | 0.00060878  | 2.007369202 | 0.000346293 | 0.001701538 |
| K02609 | 4.28E-05    | 0.000212654 | 4.974346592 | 0.00035471  | 0.00173286  |
| K02278 | 7.62E-05    | 0.000266592 | 3.49729256  | 0.000355923 | 0.00173286  |
| K09014 | 3.94E-05    | 0.000404297 | 10.260861   | 0.000356786 | 0.00173286  |
| K02203 | 0.000123979 | 2.74E-05    | 0.22094556  | 0.000356819 | 0.00173286  |
| K01682 | 4.26E-05    | 0.00019446  | 4.562170341 | 0.000358592 | 0.00173286  |
| K03576 | 4.54E-05    | 0.000197954 | 4.360358503 | 0.000358592 | 0.00173286  |
| K07156 | 3.17E-05    | 0.000195225 | 6.154067834 | 0.000359679 | 0.00173286  |
| K07345 | 3.96E-05    | 0.00018194  | 4.594230952 | 0.000359914 | 0.00173286  |
| K01720 | 2.38E-05    | 0.000162494 | 6.816757335 | 0.000360505 | 0.00173286  |



|        |             |             |             |             |             |
|--------|-------------|-------------|-------------|-------------|-------------|
| K14287 | 3.03E-05    | 0.000129003 | 4.26373228  | 0.000362789 | 0.001739638 |
| K01433 | 2.91E-05    | 0.000318182 | 10.93763318 | 0.00036449  | 0.001743593 |
| K01869 | 0.002751323 | 0.001817576 | 0.66061906  | 0.000365617 | 0.00174479  |
| K00989 | 1.96E-05    | 0.00012042  | 6.148693685 | 0.000369415 | 0.001758701 |
| K03577 | 3.01E-05    | 0.000140611 | 4.671602982 | 0.000373018 | 0.001771611 |
| K00852 | 2.43E-05    | 0.000136927 | 5.64600759  | 0.000387671 | 0.001833475 |
| K09779 | 0.000108682 | 0.000338268 | 3.112465674 | 0.000387886 | 0.001833475 |
| K07267 | 4.98E-05    | 0.000207475 | 4.166677527 | 0.000392033 | 0.001848688 |
| K05833 | 0.000151986 | 0.000339333 | 2.232652485 | 0.000394711 | 0.001856914 |
| K04096 | 2.11E-05    | 0.000129119 | 6.130694626 | 0.000399609 | 0.001868513 |
| K02052 | 2.00E-05    | 0.000167135 | 8.336774222 | 0.000399852 | 0.001868513 |
| K21053 | 3.65E-05    | 0.000158553 | 4.349562303 | 0.000401702 | 0.001868513 |
| K07091 | 3.99E-05    | 0.000167003 | 4.181366829 | 0.000401792 | 0.001868513 |
| K02834 | 0.001576327 | 0.000953464 | 0.604864348 | 0.000401871 | 0.001868513 |
| K19577 | 1.58E-05    | 0.000127179 | 8.058024492 | 0.000404627 | 0.001873309 |
| K13643 | 2.19E-05    | 0.000124478 | 5.687080659 | 0.000404785 | 0.001873309 |
| K01887 | 0.003144507 | 0.002226949 | 0.70820282  | 0.000409563 | 0.001889387 |
| K03782 | 1.68E-05    | 0.000113607 | 6.751327836 | 0.000410158 | 0.001889387 |
| K00496 | 6.24E-05    | 0.000235039 | 3.766661708 | 0.000413317 | 0.001895165 |
| K10545 | 5.51E-05    | 0.000215524 | 3.911675917 | 0.000413317 | 0.001895165 |
| K02757 | 0.00012716  | 0.000294754 | 2.317987729 | 0.000417501 | 0.001901206 |
| K02755 | 0.00012716  | 0.000294754 | 2.317987729 | 0.000417501 | 0.001901206 |
| K02756 | 0.00012716  | 0.000294754 | 2.317987729 | 0.000417501 | 0.001901206 |
| K00652 | 0.000479791 | 0.000210548 | 0.438833274 | 0.000419344 | 0.001905238 |
| K19883 | 0.000166918 | 0           | 0           | 0.00042436  | 0.001920215 |
| K01627 | 0.000126503 | 0.000475547 | 3.759163869 | 0.000424599 | 0.001920215 |

|        |             |             |             |             |             |
|--------|-------------|-------------|-------------|-------------|-------------|
| K06941 | 0.000245761 | 0.000510688 | 2.077987483 | 0.000426379 | 0.001920215 |
| K01113 | 2.14E-05    | 0.000119366 | 5.578683224 | 0.00042737  | 0.001920215 |
| K01428 | 3.31E-05    | 0.000150901 | 4.56322241  | 0.000427465 | 0.001920215 |
| K06938 | 3.66E-05    | 0.000182253 | 4.980447233 | 0.000435677 | 0.001952695 |
| K09990 | 2.63E-05    | 0.000138426 | 5.256295233 | 0.000439409 | 0.001964996 |
| K03300 | 3.01E-05    | 0.000170476 | 5.668284438 | 0.000449719 | 0.002006513 |
| K01477 | 4.46E-05    | 0.000181012 | 4.058932948 | 0.000450709 | 0.002006513 |
| K04075 | 0.000250598 | 0.000669241 | 2.67057435  | 0.000467771 | 0.00207782  |
| K01963 | 0.000696522 | 0.000231281 | 0.332050771 | 0.000475224 | 0.002099187 |
| K03117 | 3.34E-05    | 0.0001719   | 5.139699996 | 0.000475349 | 0.002099187 |
| K00833 | 2.96E-05    | 0.000128826 | 4.355460968 | 0.000475745 | 0.002099187 |
| K03816 | 0.00093309  | 0.000478868 | 0.51320684  | 0.000481113 | 0.002116971 |
| K01920 | 3.65E-05    | 0.000186338 | 5.106303054 | 0.000483362 | 0.002116971 |
| K21277 | 3.33E-05    | 0.000152268 | 4.568895789 | 0.000483879 | 0.002116971 |
| K03885 | 2.88E-05    | 0.000140453 | 4.869955152 | 0.000484031 | 0.002116971 |
| K03313 | 2.18E-05    | 0.000368136 | 16.91523092 | 0.000490735 | 0.00214003  |
| K03474 | 0.001006603 | 0.000477883 | 0.474748444 | 0.000491454 | 0.00214003  |
| K07636 | 4.53E-06    | 0.000210653 | 46.49228721 | 0.00049626  | 0.002156239 |
| K00344 | 3.73E-05    | 0.000138899 | 3.727758139 | 0.00050088  | 0.002168985 |
| K01914 | 0.001893104 | 0.00109349  | 0.577617825 | 0.000502739 | 0.002168985 |
| K19955 | 0.000103603 | 1.57E-06    | 0.015184885 | 0.000503189 | 0.002168985 |
| K07462 | 0.000232039 | 0.000632391 | 2.725371735 | 0.000504202 | 0.002168985 |
| K00368 | 5.25E-05    | 0.000202586 | 3.857596871 | 0.000504643 | 0.002168985 |
| K01139 | 3.01E-05    | 0.000152066 | 5.047567396 | 0.000508057 | 0.002174265 |
| K07735 | 2.66E-05    | 0.000137313 | 5.168044454 | 0.000508057 | 0.002174265 |
| K01707 | 3.35E-05    | 0.000170733 | 5.103798972 | 0.000513969 | 0.002188399 |

|        |             |             |             |             |             |
|--------|-------------|-------------|-------------|-------------|-------------|
| K02109 | 0.000281012 | 0.000596899 | 2.124102705 | 0.000516627 | 0.002188399 |
| K07138 | 0.000256228 | 0.00061445  | 2.398059678 | 0.000518668 | 0.002188399 |
| K01187 | 0.000125607 | 0.000562823 | 4.480810037 | 0.000518952 | 0.002188399 |
| K03439 | 0.000129709 | 0.000533597 | 4.113789983 | 0.00052017  | 0.002188399 |
| K00275 | 2.62E-05    | 0.000166683 | 6.358157823 | 0.000520611 | 0.002188399 |
| K01429 | 1.27E-05    | 0.000176884 | 13.96478053 | 0.000520626 | 0.002188399 |
| K04062 | 2.34E-05    | 0.000291335 | 12.43328546 | 0.000520626 | 0.002188399 |
| K17227 | 5.06E-05    | 0.000205364 | 4.05623787  | 0.000522278 | 0.002188399 |
| K01573 | 0.000558888 | 0.000214635 | 0.384038965 | 0.000522356 | 0.002188399 |
| K01026 | 0.000119799 | 2.46E-05    | 0.205043116 | 0.000531326 | 0.002214739 |
| K06153 | 0.001868046 | 0.001266518 | 0.677990656 | 0.000531982 | 0.002214739 |
| K03088 | 0.008935134 | 0.013505392 | 1.511492918 | 0.000531982 | 0.002214739 |
| K01265 | 0.000376458 | 0.000217759 | 0.578442458 | 0.000536961 | 0.002229171 |
| K01991 | 3.98E-05    | 0.000278613 | 7.003549653 | 0.000537689 | 0.002229171 |
| K01613 | 0.000767919 | 0.000404468 | 0.526706313 | 0.000540667 | 0.002236856 |
| K07336 | 3.83E-05    | 0.000169251 | 4.419287849 | 0.000542994 | 0.002237754 |
| K18778 | 3.30E-05    | 0.000160307 | 4.853962351 | 0.000543133 | 0.002237754 |
| K05916 | 4.61E-05    | 0.000174924 | 3.796236924 | 0.000546256 | 0.002245969 |
| K00648 | 0.001848169 | 0.001009817 | 0.546388026 | 0.000549613 | 0.00225087  |
| K02224 | 0.00025507  | 0.000556561 | 2.181990678 | 0.00054971  | 0.00225087  |
| K01897 | 0.000246779 | 0.000682386 | 2.765174248 | 0.000559035 | 0.002269591 |
| K19342 | 3.32E-05    | 0.000175683 | 5.295091401 | 0.000559928 | 0.002269591 |
| K11070 | 0.000603131 | 0.000295051 | 0.489199601 | 0.000559966 | 0.002269591 |
| K01893 | 0.001723161 | 0.001051655 | 0.6103057   | 0.000561821 | 0.002269591 |
| K01487 | 0.000115856 | 0.000446164 | 3.851021125 | 0.000563624 | 0.002269591 |
| K07347 | 3.14E-05    | 0.000126487 | 4.022905653 | 0.000564444 | 0.002269591 |

|        |             |             |             |             |             |
|--------|-------------|-------------|-------------|-------------|-------------|
| K02014 | 9.34E-05    | 0.000369322 | 3.953516696 | 0.000564547 | 0.002269591 |
| K15977 | 6.92E-05    | 0.00027118  | 3.916047711 | 0.000564547 | 0.002269591 |
| K00824 | 4.79E-05    | 0.000226619 | 4.728872982 | 0.000564547 | 0.002269591 |
| K02121 | 0.000777417 | 0.000411565 | 0.529400062 | 0.000574923 | 0.002306647 |
| K00261 | 3.14E-05    | 0.000151163 | 4.816941823 | 0.0005803   | 0.002318895 |
| K09694 | 2.62E-05    | 0.000130021 | 4.95651521  | 0.000580306 | 0.002318895 |
| K03596 | 0.00285466  | 0.002146019 | 0.751759931 | 0.000583416 | 0.0023246   |
| K00860 | 0.000476136 | 0.000232742 | 0.488814026 | 0.00058407  | 0.0023246   |
| K07082 | 0.000136891 | 0.000481743 | 3.519169932 | 0.00059338  | 0.00235557  |
| K00616 | 0.001491736 | 0.000826763 | 0.554228632 | 0.000594219 | 0.00235557  |
| K00453 | 3.17E-05    | 0.00014227  | 4.483180411 | 0.000596922 | 0.00236158  |
| K02045 | 0.000107601 | 0.000379879 | 3.530429943 | 0.000612131 | 0.002416945 |
| K09695 | 3.33E-05    | 0.00015117  | 4.54076536  | 0.000619681 | 0.002437087 |
| K02298 | 5.22E-05    | 0.000235188 | 4.504355311 | 0.000619681 | 0.002437087 |
| K02066 | 0.000523197 | 0.000217382 | 0.415489163 | 0.000624488 | 0.002451147 |
| K00451 | 5.73E-05    | 0.000208217 | 3.636852579 | 0.000626752 | 0.002455188 |
| K01679 | 0.000166729 | 0.000504022 | 3.023006708 | 0.000629066 | 0.002459412 |
| K01961 | 4.18E-05    | 0.000166841 | 3.991207788 | 0.000631019 | 0.002462211 |
| K02528 | 0.000498275 | 0.00078773  | 1.580914954 | 0.000645122 | 0.002512314 |
| K01759 | 0.000199264 | 0.000582507 | 2.923287318 | 0.00065044  | 0.00252342  |
| K02619 | 3.92E-05    | 0.000213994 | 5.459042809 | 0.00065051  | 0.00252342  |
| K00575 | 6.34E-05    | 0.000201556 | 3.181252133 | 0.0006544   | 0.002533572 |
| K01486 | 3.81E-05    | 0.000278236 | 7.299184546 | 0.000658388 | 0.002538522 |
| K19405 | 3.17E-05    | 0.000256343 | 8.077489519 | 0.000658388 | 0.002538522 |
| K01894 | 1.04E-05    | 0.000125668 | 12.0818671  | 0.000659505 | 0.002538522 |
| K21405 | 3.34E-05    | 0.000146737 | 4.389351141 | 0.000661697 | 0.002542041 |

|        |             |             |             |             |             |
|--------|-------------|-------------|-------------|-------------|-------------|
| K00895 | 0.001588171 | 0.000419854 | 0.264363318 | 0.000669441 | 0.002561167 |
| K03709 | 1.59E-05    | 0           | 0           | 0.000670702 | 0.002561167 |
| K09940 | 1.40E-05    | 0           | 0           | 0.000670702 | 0.002561167 |
| K00331 | 0.002797683 | 0.001560636 | 0.557831487 | 0.000671824 | 0.002561167 |
| K09013 | 0.000855347 | 0.000388078 | 0.453707587 | 0.00067385  | 0.00256398  |
| K02460 | 1.53E-05    | 0.00010762  | 7.043633577 | 0.000692465 | 0.00262978  |
| K01259 | 7.34E-05    | 0.000305357 | 4.160203802 | 0.00069524  | 0.00263529  |
| K00573 | 2.05E-05    | 0.000144177 | 7.048511251 | 0.000700561 | 0.002644408 |
| K01011 | 1.55E-05    | 0.000101888 | 6.552689373 | 0.000700561 | 0.002644408 |
| K03616 | 0.000174683 | 0.000421316 | 2.411882704 | 0.000701632 | 0.002644408 |
| K01737 | 0.000800689 | 0.000399025 | 0.498351946 | 0.000705012 | 0.002647543 |
| K00210 | 0.001154653 | 0.000448288 | 0.388244301 | 0.000705124 | 0.002647543 |
| K00380 | 3.75E-05    | 0.000164459 | 4.38532476  | 0.000706523 | 0.002647799 |
| K07152 | 2.88E-05    | 0.000158574 | 5.515466945 | 0.000710704 | 0.00265519  |
| K03073 | 0.000254955 | 0.000945031 | 3.706654293 | 0.000711164 | 0.00265519  |
| K22318 | 4.01E-05    | 0.000178516 | 4.455253574 | 0.000737981 | 0.002750154 |
| K00356 | 2.17E-05    | 0.000128231 | 5.899676395 | 0.000746513 | 0.002767221 |
| K00329 | 2.17E-05    | 0.000128231 | 5.899676395 | 0.000746513 | 0.002767221 |
| K04756 | 3.52E-05    | 0.000167104 | 4.740910236 | 0.000746733 | 0.002767221 |
| K02379 | 3.68E-05    | 0.000295724 | 8.027388426 | 0.00075917  | 0.002808081 |
| K00812 | 0.000350672 | 0.000103802 | 0.296008934 | 0.00077673  | 0.002867703 |
| K03438 | 0.000728316 | 0.001142357 | 1.568491803 | 0.000782959 | 0.002880725 |
| K07506 | 5.41E-05    | 0.000221076 | 4.089384887 | 0.000783152 | 0.002880725 |
| K03787 | 0.000112187 | 0.000502821 | 4.481987584 | 0.000786044 | 0.002886028 |
| K04044 | 3.20E-05    | 0.000138186 | 4.32217212  | 0.00080144  | 0.002926303 |
| K00956 | 7.40E-05    | 0.000283386 | 3.83155195  | 0.000803006 | 0.002926303 |

|        |             |             |             |             |             |
|--------|-------------|-------------|-------------|-------------|-------------|
| K11159 | 3.56E-05    | 0.000158466 | 4.445358059 | 0.000804171 | 0.002926303 |
| K17713 | 3.13E-05    | 0.00014368  | 4.583176937 | 0.000804171 | 0.002926303 |
| K02199 | 3.34E-05    | 0.000147317 | 4.415302493 | 0.000804366 | 0.002926303 |
| K02768 | 0.000201714 | 0.000714369 | 3.541499911 | 0.000810063 | 0.00294165  |
| K04517 | 7.02E-05    | 0.000348903 | 4.96813152  | 0.000813332 | 0.002948144 |
| K03803 | 3.24E-05    | 0.000253417 | 7.824990905 | 0.000815523 | 0.002950712 |
| K18120 | 4.62E-05    | 0.00034595  | 7.4822255   | 0.000824902 | 0.002979227 |
| K00878 | 4.20E-06    | 0.000202652 | 48.28232054 | 0.000831709 | 0.002998372 |
| K01468 | 1.67E-05    | 0.000134536 | 8.033406856 | 0.000834283 | 0.003002212 |
| K01008 | 0.000929813 | 0.000373143 | 0.40131029  | 0.000842933 | 0.003027863 |
| K02118 | 0.001821032 | 0.001196461 | 0.657023459 | 0.000857534 | 0.003074762 |
| K07552 | 1.61E-05    | 0.000111024 | 6.901294399 | 0.000867329 | 0.003104288 |
| K02071 | 0.000155514 | 0.00045237  | 2.908870986 | 0.000873885 | 0.003120895 |
| K19622 | 4.88E-05    | 0.000165454 | 3.39280976  | 0.000876673 | 0.003120895 |
| K07246 | 5.38E-05    | 0.000180184 | 3.349312692 | 0.000876673 | 0.003120895 |
| K07238 | 4.36E-05    | 0.000317434 | 7.284497009 | 0.000882402 | 0.003124521 |
| K02598 | 4.39E-05    | 0.000271286 | 6.176190341 | 0.000882402 | 0.003124521 |
| K00033 | 5.52E-05    | 0.000292301 | 5.2966568   | 0.000882402 | 0.003124521 |
| K12524 | 3.65E-05    | 0.000310766 | 8.514507954 | 0.000885342 | 0.003129362 |
| K00763 | 0.000187296 | 0.000521396 | 2.783802219 | 0.000889379 | 0.003138057 |
| K08998 | 0.005014364 | 0.002526013 | 0.503755347 | 0.000901151 | 0.003173967 |
| K02674 | 3.27E-05    | 0.000120881 | 3.698491159 | 0.000914659 | 0.003215851 |
| K03752 | 0.000203488 | 0.00046074  | 2.264209172 | 0.000920738 | 0.003231515 |
| K03664 | 0.002207484 | 0.00140075  | 0.634546153 | 0.000933893 | 0.003261997 |
| K02672 | 3.10E-05    | 0.00011178  | 3.611016968 | 0.000934341 | 0.003261997 |
| K22186 | 3.46E-05    | 0.00015033  | 4.346958037 | 0.000934341 | 0.003261997 |

|        |             |             |             |             |             |
|--------|-------------|-------------|-------------|-------------|-------------|
| K16923 | 2.61E-05    | 0           | 0           | 0.000945135 | 0.003293902 |
| K07037 | 0.000404895 | 0.000184649 | 0.456042334 | 0.000948221 | 0.00329888  |
| K03768 | 0.000187224 | 0.000465523 | 2.486450762 | 0.000953798 | 0.003312491 |
| K03978 | 4.76E-05    | 0.000182889 | 3.845311511 | 0.000958472 | 0.003322925 |
| K07079 | 0           | 0.000178338 | inf         | 0.000964623 | 0.003325933 |
| K21613 | 0           | 0.000146673 | inf         | 0.000964623 | 0.003325933 |
| K06889 | 0           | 4.54E-05    | inf         | 0.000964623 | 0.003325933 |
| K00943 | 2.87E-05    | 0.000183314 | 6.389549817 | 0.000966025 | 0.003325933 |
| K02275 | 4.47E-05    | 0.000152525 | 3.414851373 | 0.000976547 | 0.003356354 |
| K01079 | 0.000434284 | 0.000233079 | 0.536697708 | 0.000984175 | 0.003376739 |
| K00854 | 0.000335201 | 0.000647123 | 1.93055274  | 0.000994923 | 0.00340774  |
| K18672 | 0.000129071 | 0.000318725 | 2.469381516 | 0.001000536 | 0.003421077 |
| K00821 | 0.001699758 | 0.000818204 | 0.481364958 | 0.001009991 | 0.003446987 |
| K08715 | 1.13E-05    | 9.53E-05    | 8.406391177 | 0.001011578 | 0.003446987 |
| K01756 | 7.68E-05    | 4.98E-05    | 0.648710588 | 0.001014803 | 0.003452065 |
| K03778 | 0.000887552 | 0.000512791 | 0.577758607 | 0.001017973 | 0.003456939 |
| K01588 | 0.000120349 | 6.79E-05    | 0.564420676 | 0.001024551 | 0.003473349 |
| K07323 | 2.58E-05    | 0.000128157 | 4.967202604 | 0.001038588 | 0.003509797 |
| K06138 | 6.31E-05    | 0.000223805 | 3.54437003  | 0.001038829 | 0.003509797 |
| K01534 | 0.000110407 | 0.000271443 | 2.458558342 | 0.001046581 | 0.003511689 |
| K00982 | 2.05E-05    | 9.51E-05    | 4.644067301 | 0.001047857 | 0.003511689 |
| K06189 | 3.21E-05    | 0.000139895 | 4.357189728 | 0.001047857 | 0.003511689 |
| K15738 | 2.38E-05    | 0.000103713 | 4.363869601 | 0.001047857 | 0.003511689 |
| K03342 | 3.09E-05    | 0.000134155 | 4.336584805 | 0.001048213 | 0.003511689 |
| K01069 | 0.000185082 | 0.000497052 | 2.68557099  | 0.001069888 | 0.003578281 |
| K07277 | 0.000904345 | 0.000299004 | 0.330630631 | 0.001071921 | 0.003579065 |

|        |             |             |             |             |             |
|--------|-------------|-------------|-------------|-------------|-------------|
| K01881 | 0.00386699  | 0.002849076 | 0.736768417 | 0.001075992 | 0.003586641 |
| K01585 | 0.001836335 | 0.00122983  | 0.669719835 | 0.001104327 | 0.003674933 |
| K01066 | 0.000114076 | 0.000285458 | 2.502345132 | 0.001116935 | 0.003710687 |
| K03841 | 2.51E-05    | 0.000104378 | 4.159696342 | 0.001131435 | 0.003746501 |
| K04078 | 0.002680785 | 0.001833479 | 0.683933614 | 0.001134196 | 0.003746501 |
| K19621 | 3.17E-05    | 0.000130088 | 4.104340553 | 0.001136816 | 0.003746501 |
| K15552 | 2.86E-05    | 0.000136151 | 4.76529252  | 0.001137129 | 0.003746501 |
| K06204 | 5.48E-05    | 0.000211228 | 3.853976582 | 0.001137129 | 0.003746501 |
| K21575 | 3.29E-05    | 0.000298043 | 9.070733913 | 0.001154356 | 0.003796974 |
| K04066 | 3.28E-05    | 0.000221021 | 6.737314102 | 0.001171068 | 0.003818517 |
| K06215 | 7.25E-05    | 7.68E-05    | 1.058904918 | 0.001171767 | 0.003818517 |
| K00375 | 1.66E-05    | 0.000100853 | 6.067947506 | 0.001173965 | 0.003818517 |
| K19416 | 2.00E-05    | 0.00010543  | 5.278070119 | 0.001173965 | 0.003818517 |
| K07278 | 2.07E-05    | 0.000123289 | 5.942089734 | 0.001174448 | 0.003818517 |
| K01423 | 1.94E-05    | 9.96E-05    | 5.139920739 | 0.001177236 | 0.003818517 |
| K04751 | 3.87E-05    | 0.000228029 | 5.898249141 | 0.001177236 | 0.003818517 |
| K09165 | 8.91E-05    | 0.000306517 | 3.441881673 | 0.001178176 | 0.003818517 |
| K21012 | 3.57E-05    | 0.000139572 | 3.910917151 | 0.001178176 | 0.003818517 |
| K09007 | 5.46E-05    | 0.000156137 | 2.858792654 | 0.001208624 | 0.003910831 |
| K09159 | 3.52E-05    | 0.00016561  | 4.705812697 | 0.001217824 | 0.003927827 |
| K00382 | 2.20E-05    | 8.27E-05    | 3.762689558 | 0.001217824 | 0.003927827 |
| K00764 | 0.000339796 | 0.000150189 | 0.441997005 | 0.001222414 | 0.003932528 |
| K06374 | 0.000168368 | 0.000361719 | 2.14837879  | 0.001223234 | 0.003932528 |
| K02520 | 0.000612944 | 0.000205665 | 0.335536585 | 0.001228772 | 0.003943961 |
| K01182 | 0.000136531 | 0.000160697 | 1.177001732 | 0.001245129 | 0.003987298 |
| K10544 | 4.32E-05    | 0.000164644 | 3.811784882 | 0.001248285 | 0.003987298 |



|        |             |             |             |             |             |
|--------|-------------|-------------|-------------|-------------|-------------|
| K14393 | 3.40E-05    | 0.00012039  | 3.540589931 | 0.001248285 | 0.003987298 |
| K06867 | 3.39E-05    | 0.000121881 | 3.597620473 | 0.001254291 | 0.004000064 |
| K03655 | 0.004247532 | 0.002512373 | 0.591490117 | 0.001259563 | 0.004010449 |
| K02517 | 9.52E-05    | 0.000464897 | 4.884233598 | 0.00127962  | 0.004067801 |
| K01777 | 4.97E-05    | 0.000439952 | 8.845604027 | 0.001291544 | 0.004091985 |
| K01715 | 5.38E-05    | 0.000330914 | 6.151382978 | 0.001291544 | 0.004091985 |
| K00024 | 0.001962185 | 0.001370057 | 0.698230495 | 0.001297094 | 0.004091985 |
| K03695 | 0.00121914  | 0.000899367 | 0.73770588  | 0.001297211 | 0.004091985 |
| K04763 | 0.000194726 | 0.000470907 | 2.418303147 | 0.001297509 | 0.004091985 |
| K07304 | 3.56E-05    | 0.000105739 | 2.968300712 | 0.001303784 | 0.004100771 |
| K00690 | 0.00063554  | 0.000307272 | 0.483481747 | 0.001304416 | 0.004100771 |
| K02190 | 5.43E-05    | 0.000322383 | 5.937615545 | 0.001313754 | 0.004103227 |
| K00857 | 3.08E-05    | 0.000275467 | 8.95721285  | 0.001315535 | 0.004103227 |
| K03116 | 5.54E-05    | 0.000253675 | 4.578381153 | 0.001316063 | 0.004103227 |
| K03543 | 2.70E-05    | 0.000111534 | 4.128600345 | 0.001316494 | 0.004103227 |
| K03417 | 4.01E-05    | 0.000146814 | 3.659464977 | 0.001316494 | 0.004103227 |
| K00849 | 0.000605175 | 0.00036781  | 0.607774354 | 0.001321032 | 0.004103227 |
| K14162 | 5.08E-05    | 0.000166509 | 3.277117455 | 0.001321693 | 0.004103227 |
| K13590 | 4.86E-05    | 0.000185509 | 3.817332148 | 0.001321693 | 0.004103227 |
| K02356 | 0.002584489 | 0.001887653 | 0.730377736 | 0.001326728 | 0.004112443 |
| K16370 | 4.02E-05    | 0.000174354 | 4.331814455 | 0.001334925 | 0.004131417 |
| K05836 | 3.14E-05    | 0.000152421 | 4.859991697 | 0.001389495 | 0.004293625 |
| K03798 | 0.000186218 | 0.000390548 | 2.097263316 | 0.001408259 | 0.004302969 |
| K11752 | 0.000377463 | 0.000152733 | 0.404630807 | 0.001411845 | 0.004302969 |
| K20534 | 0.000145727 | 0.000656661 | 4.506087557 | 0.001413477 | 0.004302969 |
| K03071 | 4.24E-05    | 0.000218368 | 5.148959485 | 0.001419149 | 0.004302969 |

|        |             |             |             |             |             |
|--------|-------------|-------------|-------------|-------------|-------------|
| K09941 | 1.48E-05    | 8.85E-05    | 5.977252052 | 0.001421024 | 0.004302969 |
| K02007 | 5.38E-05    | 0.000296465 | 5.51035108  | 0.001421885 | 0.004302969 |
| K06940 | 6.01E-05    | 0.000292585 | 4.868426193 | 0.001424087 | 0.004302969 |
| K03784 | 1.21E-05    | 0           | 0           | 0.001424953 | 0.004302969 |
| K09698 | 1.86E-05    | 0           | 0           | 0.001424953 | 0.004302969 |
| K00158 | 2.38E-05    | 0           | 0           | 0.001424953 | 0.004302969 |
| K07146 | 4.03E-05    | 0           | 0           | 0.001424953 | 0.004302969 |
| K12574 | 2.69E-05    | 0           | 0           | 0.001424953 | 0.004302969 |
| K00105 | 1.57E-05    | 0           | 0           | 0.001424953 | 0.004302969 |
| K07586 | 1.83E-05    | 0           | 0           | 0.001424953 | 0.004302969 |
| K04094 | 1.50E-05    | 0           | 0           | 0.001424953 | 0.004302969 |
| K03101 | 0.000130869 | 0.000457607 | 3.496688236 | 0.001445006 | 0.004356912 |
| K02355 | 0.003927756 | 0.002907843 | 0.740332039 | 0.001471682 | 0.00443063  |
| K12511 | 5.31E-05    | 0.000177664 | 3.343029229 | 0.001480597 | 0.004450738 |
| K02665 | 5.18E-05    | 0.000192297 | 3.713532173 | 0.001494322 | 0.004478466 |
| K02494 | 2.91E-05    | 0.000122269 | 4.203917714 | 0.001494322 | 0.004478466 |
| K00971 | 1.54E-05    | 0.000180172 | 11.67382976 | 0.001497262 | 0.004479375 |
| K03118 | 3.28E-05    | 0.00022609  | 6.887448962 | 0.001499127 | 0.004479375 |
| K02257 | 3.44E-05    | 0.000140351 | 4.078909391 | 0.001511051 | 0.004494757 |
| K16080 | 3.26E-05    | 0.000122253 | 3.745517847 | 0.001511051 | 0.004494757 |
| K15725 | 4.89E-05    | 0.000191394 | 3.915242846 | 0.001511051 | 0.004494757 |
| K00788 | 0.000258906 | 0.000612179 | 2.364483755 | 0.001527605 | 0.004530806 |
| K02013 | 0.00039426  | 0.000686642 | 1.741597502 | 0.001527724 | 0.004530806 |
| K11085 | 0.001097097 | 0.00043268  | 0.394386121 | 0.001538633 | 0.004556369 |
| K19055 | 2.12E-05    | 0.000114426 | 5.40936816  | 0.001559253 | 0.00461057  |
| K02535 | 5.11E-05    | 0.000154702 | 3.027467815 | 0.001566486 | 0.004621621 |

|        |             |             |             |             |             |
|--------|-------------|-------------|-------------|-------------|-------------|
| K02340 | 0.000234636 | 0.000111421 | 0.474865552 | 0.001568294 | 0.004621621 |
| K02568 | 5.54E-05    | 0.000167791 | 3.03092556  | 0.001569958 | 0.004621621 |
| K06187 | 0.000722064 | 0.000475603 | 0.658671632 | 0.001575049 | 0.004625966 |
| K00384 | 0.001354103 | 0.001022664 | 0.755233053 | 0.001576083 | 0.004625966 |
| K20712 | 3.82E-05    | 0.000136998 | 3.58643993  | 0.0015985   | 0.004677964 |
| K06192 | 2.87E-05    | 0.000104511 | 3.641782131 | 0.0015985   | 0.004677964 |
| K07460 | 0.000227044 | 0.000489743 | 2.157043412 | 0.001626882 | 0.004754031 |
| K00351 | 0.000461133 | 0.000262788 | 0.569876029 | 0.001637125 | 0.004776947 |
| K01609 | 3.03E-05    | 0.000143673 | 4.749117608 | 0.001645899 | 0.004788506 |
| K06194 | 1.98E-05    | 8.92E-05    | 4.495276377 | 0.001645899 | 0.004788506 |
| K13747 | 0.000742475 | 0.000334371 | 0.450346226 | 0.0016637   | 0.00483323  |
| K03574 | 0.000182703 | 0.000496363 | 2.71677916  | 0.001674459 | 0.004857397 |
| K03555 | 0.00262886  | 0.001977155 | 0.752096035 | 0.00168735  | 0.004887667 |
| K01524 | 3.78E-05    | 0.000126828 | 3.353855238 | 0.001707628 | 0.004939216 |
| K01589 | 1.72E-05    | 0           | 0           | 0.001732917 | 0.005002122 |
| K01778 | 0.001897451 | 0.001447662 | 0.76295088  | 0.001734404 | 0.005002122 |
| K01885 | 0.000711245 | 0.001273481 | 1.79049651  | 0.001746406 | 0.005029447 |
| K02492 | 0.000124036 | 0.000422424 | 3.405650435 | 0.001749316 | 0.005030546 |
| K09786 | 2.90E-05    | 0.000120287 | 4.150272459 | 0.001772479 | 0.005089803 |
| K00684 | 2.17E-05    | 0.000121112 | 5.592149367 | 0.001779088 | 0.005101419 |
| K06385 | 0.000443723 | 0.00018898  | 0.425896003 | 0.001785694 | 0.005112994 |
| K02314 | 0.001792348 | 0.000418577 | 0.233535577 | 0.001795003 | 0.005122145 |
| K00844 | 9.06E-05    | 0.000547299 | 6.039059762 | 0.001797427 | 0.005122145 |
| K05796 | 8.07E-05    | 0.0004557   | 5.648545183 | 0.001797427 | 0.005122145 |
| K06411 | 0.000177101 | 0.000396729 | 2.240130708 | 0.001801724 | 0.005122145 |
| K03192 | 2.45E-05    | 0.000112634 | 4.597004823 | 0.00180176  | 0.005122145 |

|        |             |             |             |             |             |
|--------|-------------|-------------|-------------|-------------|-------------|
| K06048 | 4.20E-05    | 0.000149743 | 3.567781182 | 0.001815078 | 0.005152646 |
| K05596 | 2.39E-05    | 0.000118138 | 4.940536986 | 0.001824909 | 0.005173176 |
| K16345 | 3.98E-05    | 0.000321872 | 8.095930651 | 0.001832803 | 0.005188163 |
| K00941 | 0.00010336  | 0.000197439 | 1.910197593 | 0.001841714 | 0.005205981 |
| K03413 | 7.04E-05    | 0.000230222 | 3.26885004  | 0.001852433 | 0.005228854 |
| K06207 | 0.000942076 | 0.000411004 | 0.436274507 | 0.00186732  | 0.005263408 |
| K11189 | 0.000364275 | 0.000871094 | 2.391308849 | 0.001887068 | 0.005311551 |
| K02304 | 2.98E-05    | 0.000201638 | 6.772736427 | 0.001897691 | 0.005333904 |
| K15724 | 2.64E-05    | 0.000155723 | 5.903012144 | 0.001904981 | 0.005345646 |
| K14761 | 0.000102832 | 0.000278441 | 2.707724165 | 0.001907241 | 0.005345646 |
| K03307 | 0.000242492 | 0.001090377 | 4.496545014 | 0.001913923 | 0.005356832 |
| K00338 | 4.41E-05    | 0.000170296 | 3.860846936 | 0.001927898 | 0.005386795 |
| K00228 | 2.22E-05    | 0.000102182 | 4.611258918 | 0.001930043 | 0.005386795 |
| K09157 | 0.000606984 | 0.000322601 | 0.531481979 | 0.001938039 | 0.005401537 |
| K18955 | 4.26E-05    | 3.94E-05    | 0.926556761 | 0.001943718 | 0.005409789 |
| K00906 | 5.09E-05    | 0.000154698 | 3.041008077 | 0.001957929 | 0.005441731 |
| K00058 | 0.00030655  | 0.000756509 | 2.467814524 | 0.00197071  | 0.005469613 |
| K00266 | 0.002240028 | 0.0013369   | 0.596822741 | 0.00203058  | 0.005614797 |
| K02357 | 0.001899676 | 0.001263113 | 0.66490956  | 0.002031288 | 0.005614797 |
| K01586 | 0.000368161 | 0.000692992 | 1.88230585  | 0.002031484 | 0.005614797 |
| K00349 | 0.000936613 | 0.000576518 | 0.615534973 | 0.002072668 | 0.00572068  |
| K01886 | 0.000178563 | 0.000463742 | 2.597076135 | 0.002088147 | 0.00575542  |
| K02039 | 0.000970608 | 0.00031555  | 0.325105039 | 0.002110056 | 0.00580449  |
| K01902 | 1.42E-05    | 9.13E-05    | 6.407136174 | 0.002111784 | 0.00580449  |
| K03652 | 5.61E-06    | 0.000230625 | 41.14605838 | 0.002122211 | 0.005825102 |
| K04564 | 0.000705367 | 0.000360239 | 0.510711684 | 0.002144294 | 0.005847465 |

|        |             |             |             |             |             |
|--------|-------------|-------------|-------------|-------------|-------------|
| K14540 | 0.000154511 | 0.000331594 | 2.146084429 | 0.002155877 | 0.005847465 |
| K02948 | 0.006909484 | 0.005853781 | 0.847209606 | 0.002171952 | 0.005847465 |
| K03519 | 0           | 4.62E-05    | inf         | 0.002174429 | 0.005847465 |
| K02044 | 0           | 0.000126256 | inf         | 0.002174429 | 0.005847465 |
| K16651 | 0           | 0.000148152 | inf         | 0.002174429 | 0.005847465 |
| K01042 | 0           | 0.000202555 | inf         | 0.002174429 | 0.005847465 |
| K01154 | 0           | 9.41E-05    | inf         | 0.002174429 | 0.005847465 |
| K13818 | 0           | 0.000211023 | inf         | 0.002174429 | 0.005847465 |
| K03092 | 0           | 0.000278326 | inf         | 0.002174429 | 0.005847465 |
| K09800 | 0           | 0.000170433 | inf         | 0.002174429 | 0.005847465 |
| K06934 | 0           | 0.000110084 | inf         | 0.002174429 | 0.005847465 |
| K07218 | 5.61E-05    | 0.000176961 | 3.152291054 | 0.002174434 | 0.005847465 |
| K02419 | 5.61E-05    | 0.000173684 | 3.095884041 | 0.002174434 | 0.005847465 |
| K05874 | 3.13E-05    | 0.000113008 | 3.613786865 | 0.002174434 | 0.005847465 |
| K07137 | 0.000314642 | 0.001040937 | 3.308317868 | 0.002193627 | 0.005891116 |
| K03546 | 3.59E-05    | 0.000250061 | 6.974481371 | 0.002203318 | 0.005909169 |
| K03457 | 3.36E-05    | 0.000117054 | 3.484178202 | 0.00222699  | 0.005957273 |
| K02428 | 0.000429822 | 0.000328484 | 0.764232627 | 0.002227242 | 0.005957273 |
| K09862 | 1.47E-05    | 0.000287885 | 19.64333708 | 0.002231222 | 0.005959909 |
| K08591 | 0.000161866 | 0.000559361 | 3.455701403 | 0.002245301 | 0.005989475 |
| K09705 | 0.000108752 | 0.00027984  | 2.573192023 | 0.002256185 | 0.006010454 |
| K03481 | 4.68E-05    | 0.000350535 | 7.496083635 | 0.002262267 | 0.006011328 |
| K09790 | 7.54E-05    | 0.000207918 | 2.756570064 | 0.002262555 | 0.006011328 |
| K03188 | 1.91E-05    | 7.98E-05    | 4.171364891 | 0.002267797 | 0.006017221 |
| K00169 | 0.00014427  | 0.000328545 | 2.277294646 | 0.002291136 | 0.006071053 |
| K00297 | 0.000749547 | 0.000428068 | 0.571102445 | 0.002296019 | 0.006075902 |

|        |             |             |             |             |             |
|--------|-------------|-------------|-------------|-------------|-------------|
| K01698 | 0.000102425 | 0.000408521 | 3.988507803 | 0.002303809 | 0.006088419 |
| K01729 | 3.70E-05    | 0.000131035 | 3.537998335 | 0.002307545 | 0.006090204 |
| K03976 | 0.000168019 | 0.000350343 | 2.085138845 | 0.002312954 | 0.006096394 |
| K07713 | 0.000449612 | 3.60E-05    | 0.080177671 | 0.002334134 | 0.006144084 |
| K14155 | 0.000136168 | 0.000529529 | 3.888790545 | 0.002346187 | 0.006167651 |
| K18118 | 3.94E-05    | 0.000121843 | 3.091927322 | 0.002377128 | 0.006240746 |
| K02886 | 0.002322437 | 0.001874603 | 0.807170607 | 0.002399235 | 0.006290483 |
| K02058 | 0.000148958 | 0.000306811 | 2.059721122 | 0.002405617 | 0.006298918 |
| K03801 | 4.91E-05    | 0.000175676 | 3.574494104 | 0.002436997 | 0.006371008 |
| K00936 | 4.96E-05    | 0.000267344 | 5.388109634 | 0.002440177 | 0.006371008 |
| K06891 | 1.73E-05    | 9.05E-05    | 5.236808954 | 0.002442753 | 0.006371008 |
| K02032 | 0.000132247 | 0.000135659 | 1.02579996  | 0.002489794 | 0.006485196 |
| K01874 | 0.002799057 | 0.002162162 | 0.772460842 | 0.002520781 | 0.006554482 |
| K07720 | 0.000190032 | 0.000381867 | 2.009484403 | 0.002522982 | 0.006554482 |
| K01775 | 5.16E-05    | 0.000129121 | 2.500753446 | 0.002535439 | 0.006563848 |
| K09762 | 5.22E-05    | 4.90E-05    | 0.938018499 | 0.002535712 | 0.006563848 |
| K01505 | 3.35E-05    | 0.000124833 | 3.726323779 | 0.002536482 | 0.006563848 |
| K03802 | 2.19E-05    | 8.75E-05    | 3.992105221 | 0.002546508 | 0.006581234 |
| K01304 | 6.67E-05    | 0.000226167 | 3.388417849 | 0.002560666 | 0.006609243 |
| K09163 | 5.51E-05    | 0.000239581 | 4.347214463 | 0.002579386 | 0.006648934 |
| K03308 | 0.000540854 | 0.000254099 | 0.469809472 | 0.002585555 | 0.006656215 |
| K09955 | 0.000146284 | 0.000341432 | 2.334030246 | 0.00262814  | 0.006746744 |
| K00832 | 6.30E-05    | 0.000336184 | 5.338394824 | 0.002630807 | 0.006746744 |
| K02421 | 6.77E-05    | 0.000165788 | 2.450475068 | 0.002630891 | 0.006746744 |
| K06387 | 0.000176706 | 0.000104806 | 0.59310789  | 0.002643877 | 0.006771318 |
| K00507 | 2.95E-05    | 0.000115568 | 3.919322448 | 0.002658929 | 0.006801118 |

|        |             |             |             |             |             |
|--------|-------------|-------------|-------------|-------------|-------------|
| K05807 | 2.46E-05    | 0.000102755 | 4.183373402 | 0.002683118 | 0.006854177 |
| K03566 | 6.51E-05    | 0.000257084 | 3.946088223 | 0.00270555  | 0.006875009 |
| K06179 | 3.97E-05    | 0.000153091 | 3.854928556 | 0.00270555  | 0.006875009 |
| K00163 | 3.50E-05    | 0.000125906 | 3.595018521 | 0.00270555  | 0.006875009 |
| K05799 | 5.03E-05    | 0.000133486 | 2.655091128 | 0.002712279 | 0.006875009 |
| K01633 | 7.96E-05    | 0.000278052 | 3.493286968 | 0.002715008 | 0.006875009 |
| K02500 | 0.001724882 | 0.00116988  | 0.678237628 | 0.00271527  | 0.006875009 |
| K10026 | 0.000127822 | 0.000460621 | 3.603597854 | 0.002715456 | 0.006875009 |
| K07275 | 3.78E-05    | 0.000126866 | 3.358614643 | 0.002754533 | 0.006957697 |
| K00114 | 3.52E-05    | 0.000114299 | 3.249631622 | 0.002755108 | 0.006957697 |
| K02435 | 0.000235509 | 0.000632752 | 2.686746184 | 0.002764929 | 0.006973649 |
| K10206 | 0.002537763 | 0.001521838 | 0.599676721 | 0.002780721 | 0.0070046   |
| K03281 | 0.000588134 | 0.00026708  | 0.454114808 | 0.002788813 | 0.007016104 |
| K01892 | 0.000727478 | 0.000458285 | 0.629963329 | 0.002829599 | 0.00701688  |
| K04762 | 2.98E-05    | 0.000226737 | 7.614076056 | 0.002832787 | 0.00701688  |
| K02527 | 8.69E-05    | 0.000398677 | 4.589774606 | 0.002834961 | 0.00701688  |
| K06923 | 6.57E-05    | 0.00031158  | 4.744701014 | 0.002834961 | 0.00701688  |
| K04744 | 6.37E-05    | 0.000331093 | 5.199932171 | 0.002834961 | 0.00701688  |
| K08963 | 5.73E-05    | 0.000289356 | 5.045915935 | 0.002834961 | 0.00701688  |
| K12506 | 8.18E-05    | 0.000338596 | 4.139711089 | 0.002834961 | 0.00701688  |
| K02454 | 6.37E-05    | 0.000293985 | 4.614722442 | 0.002834961 | 0.00701688  |
| K02501 | 0.000110862 | 0.000498077 | 4.492755225 | 0.002834961 | 0.00701688  |
| K00872 | 9.48E-05    | 0.000366002 | 3.86175941  | 0.002834961 | 0.00701688  |
| K03293 | 8.85E-05    | 0.000336477 | 3.802477874 | 0.002834961 | 0.00701688  |
| K16950 | 6.06E-05    | 0.00029569  | 4.879889956 | 0.002834961 | 0.00701688  |
| K22927 | 6.51E-05    | 0.000358602 | 5.510884609 | 0.002834961 | 0.00701688  |

|        |             |             |             |             |             |
|--------|-------------|-------------|-------------|-------------|-------------|
| K07042 | 0.000401358 | 0.000680585 | 1.695705781 | 0.002864909 | 0.007082197 |
| K15778 | 3.38E-05    | 0.000110901 | 3.278240791 | 0.002920884 | 0.007211611 |
| K06969 | 0.000293548 | 0.000658449 | 2.243069052 | 0.002933337 | 0.007233384 |
| K07015 | 0.000315112 | 0.000145708 | 0.462400108 | 0.00296314  | 0.007297832 |
| K00969 | 0.000108615 | 0.000431537 | 3.97307695  | 0.002968251 | 0.007301384 |
| K15555 | 4.67E-05    | 0.000134834 | 2.8888103   | 0.003022205 | 0.007424924 |
| K20344 | 0.000413802 | 0.000163603 | 0.395364889 | 0.003032194 | 0.00744028  |
| K00001 | 6.84E-05    | 0.000369169 | 5.398780339 | 0.003053483 | 0.007464903 |
| K01077 | 8.05E-05    | 0.000395914 | 4.917877527 | 0.003053483 | 0.007464903 |
| K00756 | 7.73E-05    | 0.000337217 | 4.362540691 | 0.003053483 | 0.007464903 |
| K03584 | 0.000265538 | 0.000551238 | 2.075927096 | 0.00306653  | 0.0074876   |
| K01695 | 3.84E-05    | 0.00012098  | 3.149123756 | 0.003073531 | 0.007488053 |
| K02427 | 3.47E-05    | 0.000125002 | 3.602688882 | 0.003074241 | 0.007488053 |
| K02051 | 0.00017249  | 0.000343293 | 1.990216678 | 0.003078427 | 0.007489083 |
| K03217 | 0.000920249 | 0.000603247 | 0.655526171 | 0.003108848 | 0.007540262 |
| K09771 | 5.41E-05    | 0.000205477 | 3.801068194 | 0.003109755 | 0.007540262 |
| K00481 | 2.66E-05    | 0.000103479 | 3.887725117 | 0.003110832 | 0.007540262 |
| K00373 | 2.81E-05    | 0.000116673 | 4.151517219 | 0.003148431 | 0.007608698 |
| K16264 | 4.18E-05    | 0.000158411 | 3.78618668  | 0.003148431 | 0.007608698 |
| K00703 | 0.000115752 | 6.48E-05    | 0.560145253 | 0.003150536 | 0.007608698 |
| K03048 | 1.15E-05    | 0           | 0           | 0.003161222 | 0.007625251 |
| K03415 | 0.000112686 | 0.000264367 | 2.346048093 | 0.003195631 | 0.007698917 |
| K03367 | 6.68E-06    | 0           | 0           | 0.003206738 | 0.007700828 |
| K03366 | 7.55E-06    | 0           | 0           | 0.003206738 | 0.007700828 |
| K06180 | 0.000283622 | 0.000857961 | 3.025016288 | 0.003208034 | 0.007700828 |
| K07164 | 0.000632728 | 0.000382243 | 0.604117877 | 0.00322061  | 0.007721703 |



|        |             |             |             |             |             |
|--------|-------------|-------------|-------------|-------------|-------------|
| K16898 | 0.000137316 | 0.000440044 | 3.204610859 | 0.003270385 | 0.007831607 |
| K03324 | 0.001183081 | 0.000788161 | 0.66619396  | 0.003320193 | 0.007941326 |
| K09158 | 4.30E-05    | 0.000158228 | 3.682050963 | 0.00333415  | 0.007965135 |
| K05800 | 3.36E-05    | 0.000129658 | 3.858307724 | 0.003363257 | 0.008025037 |
| K01104 | 0.000106432 | 0.000594749 | 5.588083654 | 0.003462483 | 0.008228329 |
| K01761 | 6.16E-05    | 0.000263376 | 4.272775177 | 0.003467802 | 0.008228329 |
| K03673 | 5.55E-05    | 0.000182187 | 3.283751971 | 0.003473657 | 0.008228329 |
| K17323 | 5.17E-05    | 0.000150793 | 2.916939607 | 0.003474308 | 0.008228329 |
| K02394 | 1.96E-05    | 0.000104474 | 5.32990183  | 0.003486287 | 0.008228329 |
| K05921 | 1.97E-05    | 0.000107822 | 5.476935898 | 0.003486287 | 0.008228329 |
| K17236 | 8.61E-05    | 0.000210939 | 2.450015406 | 0.003486776 | 0.008228329 |
| K01895 | 0.00157717  | 0.000546223 | 0.346331073 | 0.003489009 | 0.008228329 |
| K14682 | 3.53E-05    | 0.00010449  | 2.961002102 | 0.003489018 | 0.008228329 |
| K03549 | 3.01E-05    | 0.000104928 | 3.490473862 | 0.003489804 | 0.008228329 |
| K02837 | 6.35E-05    | 0.000155058 | 2.441953036 | 0.003498015 | 0.008237928 |
| K03609 | 6.80E-05    | 1.81E-05    | 0.266680647 | 0.003507573 | 0.008250374 |
| K00595 | 8.76E-05    | 0.00022183  | 2.531121329 | 0.003513578 | 0.008250374 |
| K19117 | 4.34E-05    | 0.000151451 | 3.490119617 | 0.003515737 | 0.008250374 |
| K01308 | 0.000108405 | 0.00026724  | 2.465201313 | 0.003530271 | 0.008274722 |
| K09774 | 7.78E-05    | 0.000397413 | 5.111299673 | 0.003537242 | 0.008281307 |
| K00333 | 4.54E-05    | 0.000134093 | 2.954801401 | 0.003541883 | 0.00828243  |
| K05832 | 0.000710939 | 0.000273634 | 0.384890383 | 0.003557202 | 0.008308488 |
| K07718 | 0.00016015  | 0.000330151 | 2.061515736 | 0.00357143  | 0.00833194  |
| K06381 | 4.79E-05    | 0.000249801 | 5.217229796 | 0.003594565 | 0.008376094 |
| K04047 | 1.53E-05    | 0           | 0           | 0.003603793 | 0.008377977 |
| K01582 | 1.89E-05    | 0           | 0           | 0.003603793 | 0.008377977 |

|        |             |             |             |             |             |
|--------|-------------|-------------|-------------|-------------|-------------|
| K01669 | 3.04E-05    | 0.00013316  | 4.386986932 | 0.00361896  | 0.008403418 |
| K00945 | 0.000152311 | 0.000535298 | 3.514498988 | 0.003656456 | 0.00848059  |
| K03769 | 5.20E-05    | 0.000140743 | 2.706962665 | 0.003678994 | 0.008522931 |
| K04488 | 0.000507459 | 0.000730868 | 1.440251934 | 0.003742639 | 0.008660293 |
| K02069 | 0.000236606 | 0.000121641 | 0.514108549 | 0.003753238 | 0.008674731 |
| K00978 | 0.000154016 | 8.27E-05    | 0.536658448 | 0.003776499 | 0.008718368 |
| K08161 | 0.00013039  | 0.000424519 | 3.255773652 | 0.003804396 | 0.008742204 |
| K03699 | 6.54E-05    | 0.00036479  | 5.577744257 | 0.003804396 | 0.008742204 |
| K09807 | 6.96E-05    | 0.000232924 | 3.346760825 | 0.003804396 | 0.008742204 |
| K08223 | 6.21E-05    | 0.000295244 | 4.751570547 | 0.003804396 | 0.008742204 |
| K03789 | 0.000163451 | 0.000411434 | 2.517171937 | 0.00388606  | 0.008919561 |
| K19624 | 4.30E-05    | 0.000133683 | 3.106224354 | 0.003894585 | 0.00892883  |
| K02040 | 0.000646525 | 0.000316394 | 0.489375678 | 0.003914691 | 0.008964597 |
| K00413 | 3.72E-05    | 0.00013059  | 3.507729639 | 0.003920892 | 0.008968478 |
| K02825 | 6.53E-05    | 0.000197603 | 3.025537097 | 0.003932187 | 0.008983986 |
| K07478 | 7.28E-05    | 0.000247426 | 3.396826482 | 0.003951717 | 0.009007041 |
| K06879 | 3.85E-05    | 0.000140633 | 3.654875161 | 0.003954119 | 0.009007041 |
| K02231 | 5.71E-05    | 0.000164367 | 2.878599891 | 0.003955856 | 0.009007041 |
| K14645 | 4.27E-05    | 0.00014064  | 3.297297434 | 0.003969428 | 0.009027613 |
| K00240 | 0.001100503 | 0.000683823 | 0.621373743 | 0.003990739 | 0.009065721 |
| K02006 | 8.03E-05    | 0.000324117 | 4.036041167 | 0.004089761 | 0.009258959 |
| K15580 | 9.48E-05    | 0.000362049 | 3.818925636 | 0.004089761 | 0.009258959 |
| K07459 | 7.14E-05    | 0.000302116 | 4.2327503   | 0.004089761 | 0.009258959 |
| K06137 | 4.61E-05    | 0.000182816 | 3.967322023 | 0.004096289 | 0.009263199 |
| K00449 | 3.28E-05    | 0.000111669 | 3.399760697 | 0.004120845 | 0.009308152 |
| K06518 | 0.002855102 | 0.000708383 | 0.248111139 | 0.004137966 | 0.009336226 |

|        |             |             |             |             |             |
|--------|-------------|-------------|-------------|-------------|-------------|
| K17234 | 9.59E-05    | 0.000238271 | 2.484100761 | 0.004180189 | 0.009401696 |
| K05989 | 0.000124783 | 0.000293607 | 2.35293742  | 0.00418093  | 0.009401696 |
| K02068 | 8.30E-05    | 0.000230835 | 2.782779197 | 0.004181156 | 0.009401696 |
| K03785 | 4.72E-05    | 0.000272411 | 5.770355192 | 0.004198971 | 0.009424593 |
| K07456 | 0.000710236 | 0.000307036 | 0.432300561 | 0.004200811 | 0.009424593 |
| K01772 | 3.67E-05    | 0.0001336   | 3.638057962 | 0.004207181 | 0.009428254 |
| K07005 | 0.000133488 | 0.000297436 | 2.228178251 | 0.004234822 | 0.009479522 |
| K01878 | 1.54E-05    | 0.00010142  | 6.569959628 | 0.004251212 | 0.009505518 |
| K07052 | 0.000458853 | 0.0002022   | 0.440664991 | 0.004259491 | 0.009513341 |
| K02047 | 0.000532313 | 0.000231497 | 0.434889114 | 0.004304566 | 0.009603236 |
| K02115 | 0.000428126 | 0.00073357  | 1.713444966 | 0.004358102 | 0.009707645 |
| K01658 | 2.82E-06    | 0.000153182 | 54.30735672 | 0.004361123 | 0.009707645 |
| K06997 | 0.000215909 | 0.000111739 | 0.517526181 | 0.004385471 | 0.009750936 |
| K00366 | 8.45E-05    | 0.000313024 | 3.706278404 | 0.00439442  | 0.009759928 |
| K00332 | 9.96E-06    | 4.84E-05    | 4.854632645 | 0.00441558  | 0.009795992 |
| K14731 | 3.27E-05    | 0.000114919 | 3.515117125 | 0.004445352 | 0.009851059 |
| K00568 | 4.02E-05    | 0.000125434 | 3.123911947 | 0.004475806 | 0.009907513 |
| K03536 | 0.000130017 | 0.000342918 | 2.637489167 | 0.004505338 | 0.009961802 |
| K18122 | 2.76E-05    | 0.000134116 | 4.851759635 | 0.004568548 | 0.010090355 |
| K01372 | 0.000735414 | 0.000508233 | 0.691084998 | 0.004598014 | 0.010144178 |
| K05550 | 3.72E-05    | 0.00012589  | 3.38592339  | 0.004604502 | 0.010147242 |
| K00688 | 0.000453944 | 0.000233167 | 0.513645632 | 0.004622515 | 0.010175669 |
| K07112 | 0.000191213 | 0.000402862 | 2.106876684 | 0.004672518 | 0.010274376 |
| K06023 | 0.000446395 | 0.000614414 | 1.376388869 | 0.004700644 | 0.010324814 |
| K01624 | 0.000243312 | 0.000168663 | 0.693195418 | 0.004709264 | 0.010332344 |
| K19302 | 0.000126641 | 0.000553263 | 4.36873     | 0.004728224 | 0.010362517 |

|        |             |             |             |             |             |
|--------|-------------|-------------|-------------|-------------|-------------|
| K02037 | 0.000413138 | 0.000647791 | 1.567978842 | 0.004757335 | 0.010404662 |
| K01903 | 3.77E-05    | 0.000122503 | 3.248288527 | 0.004757911 | 0.010404662 |
| K09685 | 1.78E-05    | 0           | 0           | 0.004808563 | 0.010503886 |
| K12510 | 0.000407344 | 0.000212622 | 0.521972699 | 0.004889577 | 0.010639956 |
| K01819 | 1.46E-05    | 0           | 0           | 0.004892241 | 0.010639956 |
| K01916 | 1.17E-05    | 0           | 0           | 0.004892241 | 0.010639956 |
| K15986 | 1.76E-05    | 0           | 0           | 0.004892241 | 0.010639956 |
| K00963 | 5.04E-05    | 0.000130927 | 2.595819085 | 0.004905911 | 0.010658038 |
| K07006 | 4.51E-05    | 0.000170423 | 3.778667137 | 0.00491661  | 0.010664743 |
| K00370 | 3.18E-05    | 9.64E-05    | 3.035626723 | 0.004919716 | 0.010664743 |
| K01696 | 0.001858397 | 0.001345029 | 0.723757643 | 0.004947708 | 0.010668981 |
| K07341 | 0           | 8.44E-05    | inf         | 0.004948477 | 0.010668981 |
| K01223 | 0           | 0.000146155 | inf         | 0.004948477 | 0.010668981 |
| K02483 | 0           | 2.80E-05    | inf         | 0.004948477 | 0.010668981 |
| K21449 | 0           | 0.000122776 | inf         | 0.004948477 | 0.010668981 |
| K08317 | 3.67E-05    | 0           | 0           | 0.005000169 | 0.010722345 |
| K09952 | 3.76E-05    | 0           | 0           | 0.005000169 | 0.010722345 |
| K01760 | 4.97E-05    | 0           | 0           | 0.005000169 | 0.010722345 |
| K07075 | 1.97E-05    | 0           | 0           | 0.005000169 | 0.010722345 |
| K03598 | 7.97E-05    | 0           | 0           | 0.005000169 | 0.010722345 |
| K01488 | 0.000752018 | 0.000379169 | 0.504202671 | 0.00500901  | 0.010729742 |
| K00957 | 0.002493206 | 0.001836907 | 0.736764852 | 0.005025559 | 0.010744626 |
| K03526 | 0.001083191 | 0.000754412 | 0.696471652 | 0.005026757 | 0.010744626 |
| K05592 | 6.85E-05    | 0.000298268 | 4.351264661 | 0.005047464 | 0.010777309 |
| K21929 | 0.000107489 | 0.000415397 | 3.864563578 | 0.005066213 | 0.01080575  |
| K03743 | 0.000763464 | 0.000486803 | 0.637623368 | 0.00508957  | 0.010843945 |

|        |             |             |             |             |             |
|--------|-------------|-------------|-------------|-------------|-------------|
| K03814 | 4.65E-05    | 0.000142806 | 3.069003455 | 0.005153736 | 0.010968913 |
| K03665 | 0.001642781 | 0.000543169 | 0.330639698 | 0.005192614 | 0.011039852 |
| K03498 | 0.000138033 | 0.000548175 | 3.971326087 | 0.005238574 | 0.011125681 |
| K00561 | 0.003358198 | 0.00377002  | 1.122631844 | 0.005289725 | 0.011222338 |
| K02804 | 0.000642957 | 0.000339141 | 0.527470707 | 0.005324263 | 0.011271577 |
| K02803 | 0.000642957 | 0.000339141 | 0.527470707 | 0.005324263 | 0.011271577 |
| K02750 | 9.64E-05    | 0.000424041 | 4.39998542  | 0.005363006 | 0.011329492 |
| K02749 | 9.64E-05    | 0.000424041 | 4.39998542  | 0.005363006 | 0.011329492 |
| K03327 | 4.28E-05    | 0.000126091 | 2.942875921 | 0.005372969 | 0.011338503 |
| K07078 | 8.94E-05    | 0.000325018 | 3.63643278  | 0.005435784 | 0.011441946 |
| K22305 | 0.000130645 | 0.000458239 | 3.507506185 | 0.005435784 | 0.011441946 |
| K10537 | 3.38E-05    | 0.000114473 | 3.391752909 | 0.005439237 | 0.011441946 |
| K17103 | 4.15E-05    | 0.000122816 | 2.960146897 | 0.005451865 | 0.011456401 |
| K19299 | 0.000238501 | 4.83E-05    | 0.202368866 | 0.005473593 | 0.011489926 |
| K06133 | 0.000270621 | 0.000146125 | 0.539960566 | 0.005499631 | 0.011532419 |
| K01628 | 0.000203483 | 0.000130277 | 0.640237864 | 0.005530148 | 0.011584205 |
| K00598 | 1.13E-05    | 6.41E-05    | 5.677636581 | 0.00555138  | 0.011604251 |
| K02509 | 1.10E-05    | 5.46E-05    | 4.948698754 | 0.00555138  | 0.011604251 |
| K03977 | 0.00206417  | 0.001453563 | 0.704187391 | 0.005574259 | 0.011639849 |
| K01783 | 0.000147626 | 0.000456794 | 3.094274676 | 0.005659211 | 0.011804853 |
| K09019 | 4.43E-05    | 0.000163463 | 3.694061681 | 0.00566594  | 0.011806513 |
| K11927 | 1.35E-05    | 5.46E-05    | 4.034456139 | 0.005679375 | 0.01182213  |
| K00005 | 6.91E-05    | 0.000332683 | 4.812490399 | 0.005744621 | 0.01194545  |
| K08311 | 5.92E-05    | 0.000152986 | 2.583802585 | 0.005754332 | 0.011953154 |
| K05946 | 0.000213896 | 0.000558827 | 2.612608882 | 0.005833398 | 0.012104758 |
| K01629 | 0.000200709 | 0.000357667 | 1.782019705 | 0.005880109 | 0.012188976 |

|        |             |             |             |             |             |
|--------|-------------|-------------|-------------|-------------|-------------|
| K03106 | 0.000177541 | 0.000126651 | 0.713358474 | 0.005919062 | 0.012256954 |
| K09129 | 4.09E-05    | 0.000112578 | 2.75434465  | 0.006014992 | 0.012442655 |
| K07813 | 0.00057043  | 0.001392471 | 2.441089932 | 0.006069186 | 0.012541724 |
| K02197 | 4.46E-05    | 0.000130994 | 2.937791602 | 0.006139542 | 0.012656585 |
| K01451 | 3.38E-05    | 0.00011306  | 3.348517073 | 0.006141391 | 0.012656585 |
| K02001 | 0.000186882 | 0.000123389 | 0.660249801 | 0.00614385  | 0.012656585 |
| K07127 | 3.10E-05    | 0.000117912 | 3.801556832 | 0.00615504  | 0.012657624 |
| K07173 | 3.96E-05    | 7.59E-06    | 0.191645342 | 0.00617754  | 0.012657624 |
| K02588 | 0.00010259  | 4.30E-05    | 0.419252187 | 0.00618329  | 0.012657624 |
| K07035 | 0.000870161 | 0.000425968 | 0.489527809 | 0.006187635 | 0.012657624 |
| K20117 | 0.000189528 | 0.000505329 | 2.6662568   | 0.006188879 | 0.012657624 |
| K20118 | 0.000189528 | 0.000505329 | 2.6662568   | 0.006188879 | 0.012657624 |
| K20116 | 0.000189528 | 0.000505329 | 2.6662568   | 0.006188879 | 0.012657624 |
| K06139 | 3.49E-05    | 0.000110068 | 3.155954416 | 0.006210514 | 0.012688833 |
| K08289 | 0.002149587 | 0.001370476 | 0.637552949 | 0.006249221 | 0.01275482  |
| K06131 | 1.94E-05    | 7.10E-05    | 3.65514154  | 0.006282525 | 0.012809657 |
| K22010 | 0.000127274 | 0.00032045  | 2.517796026 | 0.006308981 | 0.012850432 |
| K09001 | 7.54E-05    | 0.000186869 | 2.479258492 | 0.006519736 | 0.013266129 |
| K01870 | 0.000263313 | 0.000580915 | 2.206178153 | 0.006562894 | 0.013340305 |
| K14652 | 0.001686555 | 0.000853169 | 0.505865044 | 0.006575344 | 0.013351974 |
| K01028 | 4.22E-05    | 0.000126745 | 3.006651574 | 0.00660366  | 0.013369749 |
| K01724 | 5.68E-05    | 0.000222821 | 3.923665304 | 0.00660366  | 0.013369749 |
| K08084 | 5.58E-05    | 0.000180096 | 3.226892473 | 0.006605617 | 0.013369749 |
| K00096 | 0.000630209 | 0.000286657 | 0.454860514 | 0.006617895 | 0.013369749 |
| K01092 | 3.72E-05    | 0.000121878 | 3.274239578 | 0.006629537 | 0.013369749 |
| K18979 | 2.69E-05    | 9.74E-05    | 3.617115208 | 0.006629537 | 0.013369749 |

|        |             |             |             |             |             |
|--------|-------------|-------------|-------------|-------------|-------------|
| K02195 | 3.51E-05    | 0.000104663 | 2.983088676 | 0.006631127 | 0.013369749 |
| K01915 | 0.002943176 | 0.00191275  | 0.649893274 | 0.006668789 | 0.013432075 |
| K01151 | 9.43E-05    | 0.00033435  | 3.547379503 | 0.006695015 | 0.013457656 |
| K09963 | 9.12E-05    | 0.000359216 | 3.938404917 | 0.006695015 | 0.013457656 |
| K02557 | 8.19E-05    | 0.000184826 | 2.256608214 | 0.006764559 | 0.013583727 |
| K02935 | 0.003055653 | 0.002209855 | 0.723202237 | 0.00678863  | 0.013604607 |
| K02965 | 0.006782138 | 0.005298252 | 0.781206759 | 0.00678863  | 0.013604607 |
| K15583 | 7.83E-05    | 0.000354118 | 4.524708196 | 0.006812318 | 0.013638342 |
| K02189 | 0.00015722  | 0.000347419 | 2.209762999 | 0.006871478 | 0.013730809 |
| K01596 | 5.83E-05    | 0.00014137  | 2.424290017 | 0.006872304 | 0.013730809 |
| K15770 | 0.000108406 | 0.000242841 | 2.240106746 | 0.006927034 | 0.013823927 |
| K06921 | 2.32E-05    | 0.000270233 | 11.62735474 | 0.006932804 | 0.013823927 |
| K02343 | 0.000120384 | 0.000427969 | 3.555026501 | 0.007053    | 0.014046081 |
| K03826 | 1.93E-05    | 2.57E-06    | 0.133531942 | 0.007058332 | 0.014046081 |
| K03530 | 0.001764819 | 0.001042065 | 0.590465528 | 0.007067929 | 0.014051128 |
| K02188 | 0.000171812 | 0.000451926 | 2.630355701 | 0.007078421 | 0.014057943 |
| K03154 | 7.36E-05    | 0.000213674 | 2.902064699 | 0.00709909  | 0.014075007 |
| K03274 | 2.67E-05    | 8.04E-05    | 3.014517278 | 0.007101159 | 0.014075007 |
| K01243 | 0.000111638 | 0.000285079 | 2.553602466 | 0.007119353 | 0.014097026 |
| K07002 | 2.89E-05    | 9.71E-05    | 3.36655725  | 0.007141304 | 0.014121838 |
| K07448 | 9.67E-05    | 4.32E-05    | 0.446662577 | 0.007146076 | 0.014121838 |
| K04654 | 0.000140014 | 0.000138307 | 0.987814712 | 0.007167604 | 0.014150329 |
| K02836 | 7.81E-05    | 7.61E-05    | 0.973948875 | 0.007218016 | 0.014235731 |
| K06975 | 0.000124547 | 0.000315937 | 2.536686672 | 0.007299953 | 0.014383076 |
| K02950 | 0.005245626 | 0.007036991 | 1.341496778 | 0.00731539  | 0.014399235 |
| K08301 | 0.000150591 | 0.000405179 | 2.690583915 | 0.00733167  | 0.014417018 |

|        |             |             |             |             |             |
|--------|-------------|-------------|-------------|-------------|-------------|
| K03466 | 0.000221817 | 0.000591701 | 2.667518812 | 0.007367696 | 0.014432543 |
| K16509 | 1.83E-05    | 0           | 0           | 0.007368575 | 0.014432543 |
| K01635 | 1.43E-05    | 0           | 0           | 0.007368575 | 0.014432543 |
| K05823 | 1.75E-05    | 0           | 0           | 0.007368575 | 0.014432543 |
| K05589 | 5.46E-05    | 0.000157853 | 2.888973259 | 0.007398039 | 0.014476005 |
| K07443 | 0.000145536 | 0.000417103 | 2.865974629 | 0.007452594 | 0.014568431 |
| K01267 | 0.000264826 | 0.000510662 | 1.928291149 | 0.007582383 | 0.014807598 |
| K03545 | 0.000703372 | 0.000465299 | 0.661525998 | 0.007600714 | 0.014828845 |
| K00677 | 0.000522634 | 0.000329384 | 0.630238385 | 0.007627815 | 0.014867141 |
| K01436 | 0.000103782 | 0.00044036  | 4.243142394 | 0.007659301 | 0.014913903 |
| K03272 | 0.000110952 | 0.000345221 | 3.111453542 | 0.007674334 | 0.014928567 |
| K01258 | 3.53E-05    | 3.31E-06    | 0.093543985 | 0.00770106  | 0.014965927 |
| K02123 | 0.000370793 | 0.000255904 | 0.690152974 | 0.007721683 | 0.014991366 |
| K00111 | 0.000193289 | 0.000363924 | 1.882798365 | 0.007737878 | 0.015008164 |
| K03547 | 0.000155257 | 0.000342046 | 2.203100314 | 0.007777093 | 0.015069539 |
| K03529 | 0.000158715 | 0.000426636 | 2.688058641 | 0.007788516 | 0.015076991 |
| K01653 | 0.000117108 | 5.67E-05    | 0.484307042 | 0.007818033 | 0.015119422 |
| K03634 | 2.38E-05    | 8.57E-05    | 3.59894148  | 0.007829981 | 0.015127827 |
| K01858 | 7.65E-05    | 5.51E-05    | 0.72089973  | 0.007842711 | 0.015137726 |
| K06310 | 0.000161996 | 0.000319287 | 1.970956685 | 0.007868203 | 0.015172213 |
| K01876 | 0.002638525 | 0.001873839 | 0.710184176 | 0.007878535 | 0.01517743  |
| K00549 | 7.64E-05    | 7.18E-05    | 0.939623897 | 0.00789364  | 0.015191821 |
| K03650 | 0.000108592 | 0.000464197 | 4.274697232 | 0.008079341 | 0.015534192 |
| K03427 | 0.000163109 | 0.000367772 | 2.254763965 | 0.008088088 | 0.015535998 |
| K02656 | 2.81E-05    | 9.67E-05    | 3.444059514 | 0.00809842  | 0.015540846 |
| K02652 | 3.67E-05    | 0.000112481 | 3.066842385 | 0.008131745 | 0.015589763 |



|        |             |             |             |             |             |
|--------|-------------|-------------|-------------|-------------|-------------|
| K08217 | 0.00016469  | 8.57E-05    | 0.520249138 | 0.008145745 | 0.015598461 |
| K06966 | 3.98E-05    | 0.000170782 | 4.295405852 | 0.008151959 | 0.015598461 |
| K01615 | 0.000117707 | 5.66E-05    | 0.480624697 | 0.008161156 | 0.015601058 |
| K10831 | 3.35E-05    | 9.45E-05    | 2.823365176 | 0.008193504 | 0.015647863 |
| K02405 | 0.000110168 | 0.0002347   | 2.130380306 | 0.008258683 | 0.015757219 |
| K01657 | 0.001216946 | 0.000871899 | 0.716464385 | 0.008360879 | 0.015924407 |
| K07089 | 5.92E-06    | 0           | 0           | 0.008386321 | 0.015924407 |
| K01512 | 1.35E-05    | 0           | 0           | 0.008386321 | 0.015924407 |
| K03095 | 1.21E-05    | 0           | 0           | 0.008386321 | 0.015924407 |
| K02761 | 8.85E-06    | 0           | 0           | 0.008386321 | 0.015924407 |
| K07010 | 4.75E-05    | 5.31E-05    | 1.117831749 | 0.008403369 | 0.015941568 |
| K03394 | 0.00011597  | 4.93E-05    | 0.424924092 | 0.008514293 | 0.016128457 |
| K03311 | 7.41E-05    | 0.000293724 | 3.962844396 | 0.008518095 | 0.016128457 |
| K12257 | 0.001478148 | 0.000745301 | 0.504212972 | 0.008535102 | 0.016145297 |
| K03786 | 5.38E-05    | 0.000152628 | 2.836361693 | 0.008579481 | 0.016213834 |
| K07584 | 0.000163312 | 5.90E-05    | 0.361019165 | 0.008599907 | 0.016237017 |
| K06909 | 0.000118967 | 3.46E-05    | 0.291199694 | 0.008624498 | 0.01626801  |
| K07009 | 1.95E-05    | 5.30E-05    | 2.709404787 | 0.008635818 | 0.016273937 |
| K05541 | 3.41E-05    | 0.000101922 | 2.993245485 | 0.0086657   | 0.016314799 |
| K06397 | 0.000129116 | 0.000295171 | 2.286095367 | 0.008721434 | 0.01640421  |
| K20265 | 0.000563869 | 0.00026069  | 0.462322884 | 0.008735475 | 0.016415103 |
| K03410 | 9.36E-05    | 0.000215029 | 2.296360184 | 0.008754344 | 0.016435042 |
| K05601 | 0.000540176 | 0.000358111 | 0.662951681 | 0.008772372 | 0.016444242 |
| K07012 | 4.37E-05    | 0.000178328 | 4.076136191 | 0.008775771 | 0.016444242 |
| K00374 | 4.75E-05    | 0.000128871 | 2.711229229 | 0.008791727 | 0.016458642 |
| K02668 | 1.15E-05    | 6.23E-05    | 5.422357768 | 0.008827615 | 0.016476697 |

|        |             |             |             |             |             |
|--------|-------------|-------------|-------------|-------------|-------------|
| K09858 | 1.50E-05    | 4.67E-05    | 3.124828885 | 0.008827615 | 0.016476697 |
| K03424 | 0.000184911 | 0.000565851 | 3.060129767 | 0.008829444 | 0.016476697 |
| K00340 | 2.41E-05    | 0.000126822 | 5.263470438 | 0.008834449 | 0.016476697 |
| K02654 | 0.000604467 | 0.002214386 | 3.663371825 | 0.009034058 | 0.016833123 |
| K01996 | 0.000301824 | 0.000472842 | 1.566616454 | 0.00905003  | 0.016842407 |
| K09768 | 0.000114147 | 0.000199228 | 1.745362383 | 0.009055968 | 0.016842407 |
| K15012 | 4.62E-05    | 0.00013868  | 3.002297684 | 0.009142946 | 0.016988293 |
| K00604 | 0.000607094 | 0.000863974 | 1.423129996 | 0.009217444 | 0.017110741 |
| K03686 | 0.001258384 | 0.000722457 | 0.574114487 | 0.00923211  | 0.017121994 |
| K00948 | 0.000320301 | 0.000589382 | 1.840087819 | 0.009281577 | 0.017197708 |
| K00666 | 0.0001088   | 0.00018373  | 1.688692219 | 0.009359335 | 0.017325654 |
| K05805 | 4.01E-05    | 0.000134721 | 3.363478289 | 0.009375602 | 0.017339635 |
| K03601 | 8.23E-05    | 0.000326661 | 3.971218072 | 0.009384749 | 0.017340437 |
| K01918 | 0.000751153 | 0.001094498 | 1.457091536 | 0.009400674 | 0.017353748 |
| K05350 | 0.000153712 | 0.000323969 | 2.107632315 | 0.009480211 | 0.017484357 |
| K02744 | 5.42E-05    | 2.55E-06    | 0.047032977 | 0.009514344 | 0.017531061 |
| K00016 | 6.66E-05    | 7.19E-05    | 1.079254346 | 0.009577354 | 0.017630837 |
| K07386 | 0.00010225  | 0.000356434 | 3.485906627 | 0.009607578 | 0.01767013  |
| K02408 | 0.000121414 | 0.000275347 | 2.267827387 | 0.009637935 | 0.017709595 |
| K03614 | 0.000650842 | 0.000395896 | 0.608283009 | 0.009689097 | 0.01778718  |
| K05813 | 0.000128841 | 0.000264791 | 2.055167795 | 0.009742043 | 0.017867895 |
| K03151 | 0.000562819 | 0.000277661 | 0.493340351 | 0.009772487 | 0.017907227 |
| K00790 | 0.001093242 | 0.000783515 | 0.716689358 | 0.00982331  | 0.017983797 |
| K02111 | 0.00404183  | 0.003268338 | 0.808628372 | 0.009950656 | 0.018200188 |
| K03742 | 5.10E-05    | 0.000302849 | 5.943258094 | 0.010041709 | 0.018349863 |
| K03706 | 0.00012985  | 0.000222687 | 1.714957794 | 0.010053106 | 0.018353836 |

|        |             |             |             |             |             |
|--------|-------------|-------------|-------------|-------------|-------------|
| K03189 | 3.20E-05    | 0.000101689 | 3.176718833 | 0.010140343 | 0.018496135 |
| K07040 | 0.00015125  | 0.000450864 | 2.980928777 | 0.010211168 | 0.018608264 |
| K01462 | 0.002305425 | 0.001677259 | 0.727527067 | 0.010240827 | 0.018645238 |
| K03269 | 0.000449748 | 0.000291174 | 0.647416639 | 0.01039951  | 0.018916841 |
| K09767 | 3.80E-05    | 0.000115604 | 3.043446791 | 0.010413891 | 0.018925702 |
| K01923 | 0.000997514 | 0.000755932 | 0.757816382 | 0.010538269 | 0.019134265 |
| K01704 | 0.000388052 | 0.000607055 | 1.564365025 | 0.010580201 | 0.01919289  |
| K01155 | 1.79E-05    | 0.000112042 | 6.2702425   | 0.010627063 | 0.019260342 |
| K21345 | 9.83E-07    | 5.25E-05    | 53.3914692  | 0.010654537 | 0.019275026 |
| K18345 | 1.56E-06    | 3.15E-05    | 20.18845307 | 0.010654537 | 0.019275026 |
| K03722 | 3.35E-05    | 9.74E-05    | 2.90945863  | 0.010724266 | 0.019383551 |
| K00926 | 6.91E-05    | 2.73E-05    | 0.395169558 | 0.010771929 | 0.019452031 |
| K07560 | 0.000201309 | 0.000332704 | 1.652699486 | 0.010813095 | 0.019508666 |
| K13010 | 4.50E-05    | 0.000118914 | 2.639863215 | 0.01083906  | 0.019537799 |
| K16692 | 3.15E-06    | 4.81E-05    | 15.2995192  | 0.010850652 | 0.019540993 |
| K00859 | 0.000105709 | 0.000396852 | 3.754206316 | 0.010887413 | 0.019589469 |
| K06191 | 8.93E-06    | 0           | 0           | 0.010909498 | 0.019593774 |
| K02795 | 9.13E-06    | 0           | 0           | 0.010909498 | 0.019593774 |
| K07085 | 0.002147248 | 0.001309954 | 0.610061731 | 0.010944518 | 0.019638945 |
| K00528 | 0.000826464 | 0.000467648 | 0.565841657 | 0.011028136 | 0.019769674 |
| K07027 | 0.000127145 | 0.000260687 | 2.050310608 | 0.011047314 | 0.019769674 |
| K06972 | 0.000137824 | 0.000361505 | 2.622952441 | 0.011053345 | 0.019769674 |
| K04651 | 9.95E-05    | 0.000273297 | 2.746082282 | 0.011057109 | 0.019769674 |
| K00448 | 2.30E-05    | 6.66E-05    | 2.899438328 | 0.011154298 | 0.019925541 |
| K00364 | 1.28E-05    | 0           | 0           | 0.011209733 | 0.019956021 |
| K03078 | 8.18E-06    | 0           | 0           | 0.011209733 | 0.019956021 |

|        |             |             |             |             |             |
|--------|-------------|-------------|-------------|-------------|-------------|
| K00226 | 7.04E-06    | 0           | 0           | 0.011209733 | 0.019956021 |
| K06173 | 0.001118163 | 0.000802674 | 0.717850762 | 0.011305233 | 0.019956021 |
| K03385 | 0           | 4.53E-05    | inf         | 0.011412036 | 0.019956021 |
| K19130 | 0           | 8.38E-05    | inf         | 0.011412036 | 0.019956021 |
| K19129 | 0           | 6.29E-05    | inf         | 0.011412036 | 0.019956021 |
| K03781 | 0           | 4.75E-05    | inf         | 0.011412036 | 0.019956021 |
| K01442 | 0           | 5.29E-05    | inf         | 0.011412036 | 0.019956021 |
| K19127 | 0           | 7.25E-05    | inf         | 0.011412036 | 0.019956021 |
| K19128 | 0           | 7.56E-05    | inf         | 0.011412036 | 0.019956021 |
| K14988 | 0           | 1.18E-05    | inf         | 0.011412036 | 0.019956021 |
| K03386 | 0           | 4.21E-05    | inf         | 0.011412036 | 0.019956021 |
| K01572 | 0           | 4.28E-05    | inf         | 0.011412036 | 0.019956021 |
| K06911 | 0           | 2.69E-05    | inf         | 0.011412036 | 0.019956021 |
| K20444 | 0           | 1.91E-05    | inf         | 0.011412036 | 0.019956021 |
| K00259 | 0           | 3.77E-05    | inf         | 0.011412036 | 0.019956021 |
| K15987 | 0           | 4.45E-05    | inf         | 0.011412036 | 0.019956021 |
| K07106 | 0           | 5.19E-05    | inf         | 0.011412036 | 0.019956021 |
| K18707 | 0           | 6.64E-05    | inf         | 0.011412036 | 0.019956021 |
| K06223 | 0           | 2.97E-05    | inf         | 0.011412036 | 0.019956021 |
| K18785 | 0           | 5.19E-05    | inf         | 0.011412036 | 0.019956021 |
| K01639 | 0           | 3.78E-05    | inf         | 0.011412036 | 0.019956021 |
| K01089 | 0           | 3.17E-05    | inf         | 0.011412036 | 0.019956021 |
| K09777 | 0.000105898 | 0.000294843 | 2.784220059 | 0.0114274   | 0.019965344 |
| K07305 | 5.53E-05    | 0.000152717 | 2.76073658  | 0.011457581 | 0.020000514 |
| K03442 | 0.000769338 | 0.000517051 | 0.672072715 | 0.011531468 | 0.02011185  |
| K01644 | 3.80E-05    | 0.000106119 | 2.789277445 | 0.011714779 | 0.020413669 |

|        |             |             |             |             |             |
|--------|-------------|-------------|-------------|-------------|-------------|
| K00641 | 3.93E-05    | 0.000102545 | 2.610780962 | 0.011728554 | 0.020414139 |
| K01215 | 3.35E-05    | 5.28E-06    | 0.157320327 | 0.011735565 | 0.020414139 |
| K01814 | 0.000903021 | 0.000748649 | 0.829049582 | 0.011772348 | 0.020460237 |
| K02926 | 0.001944886 | 0.001591685 | 0.81839488  | 0.011810031 | 0.02050782  |
| K02914 | 0.041227684 | 0.02962996  | 0.718690868 | 0.011873396 | 0.020599875 |
| K03637 | 0.000265708 | 0.000756043 | 2.845396783 | 0.011945996 | 0.02069991  |
| K01711 | 0.002178857 | 0.001590378 | 0.72991409  | 0.011951858 | 0.02069991  |
| K02601 | 0.000120215 | 8.63E-05    | 0.718249371 | 0.01198667  | 0.02074215  |
| K01095 | 1.92E-05    | 3.26E-06    | 0.169488057 | 0.012005083 | 0.020755965 |
| K02401 | 9.70E-05    | 0.000204363 | 2.107554139 | 0.012067328 | 0.020845471 |
| K18889 | 0.000384797 | 0.000206518 | 0.536693554 | 0.012208857 | 0.021066896 |
| K07301 | 0.00022747  | 0.000474    | 2.083786816 | 0.012218524 | 0.021066896 |
| K01507 | 8.34E-05    | 0.000156499 | 1.875965055 | 0.012230687 | 0.021066896 |
| K03559 | 0.00118071  | 0.000772795 | 0.654517385 | 0.012237855 | 0.021066896 |
| K02346 | 0.000142372 | 0.000444201 | 3.119992634 | 0.012449573 | 0.021412835 |
| K04487 | 0.000112926 | 0.000241298 | 2.136772882 | 0.012523573 | 0.021521511 |
| K10117 | 0.000528267 | 0.000452134 | 0.855881264 | 0.012633043 | 0.021690903 |
| K01867 | 0.001154845 | 0.000482713 | 0.417988892 | 0.012767327 | 0.021902569 |
| K03408 | 8.15E-05    | 0.000192737 | 2.365418703 | 0.012803002 | 0.021944853 |
| K19689 | 0.000103497 | 0.000326226 | 3.152020806 | 0.012821839 | 0.021958226 |
| K06398 | 0.00030468  | 0.000192977 | 0.633378062 | 0.013025901 | 0.022288516 |
| K00164 | 4.05E-05    | 9.33E-05    | 2.306685696 | 0.013254014 | 0.022659354 |
| K05985 | 7.82E-05    | 0.000312757 | 4.000888998 | 0.013343997 | 0.022793609 |
| K06952 | 0.000355851 | 0.000605545 | 1.701682234 | 0.013375245 | 0.022827391 |
| K03648 | 0.000663574 | 0.000451388 | 0.680237755 | 0.013445078 | 0.022916034 |
| K10823 | 0.000114824 | 0.000384398 | 3.347725534 | 0.013450215 | 0.022916034 |

|        |             |             |             |             |             |
|--------|-------------|-------------|-------------|-------------|-------------|
| K01962 | 0.000723805 | 0.000368135 | 0.508611001 | 0.013537214 | 0.02304453  |
| K06403 | 0.000357394 | 0.000202396 | 0.566310637 | 0.013560411 | 0.023064289 |
| K00067 | 6.28E-05    | 0.000173825 | 2.766230453 | 0.013987974 | 0.023771195 |
| K15577 | 2.97E-05    | 9.53E-05    | 3.209403418 | 0.014000075 | 0.023771459 |
| K00537 | 2.02E-05    | 0           | 0           | 0.014058605 | 0.023846956 |
| K09806 | 5.17E-05    | 0.00015971  | 3.086610728 | 0.014076321 | 0.023846956 |
| K00012 | 2.91E-05    | 0.000113501 | 3.906299167 | 0.014080489 | 0.023846956 |
| K00702 | 8.69E-05    | 3.45E-05    | 0.397621116 | 0.014107074 | 0.023871664 |
| K16137 | 4.73E-05    | 0.000117978 | 2.493168686 | 0.014214819 | 0.024033173 |
| K09810 | 0.002086527 | 0.0007535   | 0.361126574 | 0.014226672 | 0.024033173 |
| K03495 | 0.001249625 | 0.00089675  | 0.717615643 | 0.014413485 | 0.024328104 |
| K01200 | 0.000298333 | 0.0001504   | 0.504133863 | 0.01449125  | 0.024438633 |
| K07736 | 0.000276916 | 0.0004768   | 1.721820688 | 0.014723475 | 0.024809243 |
| K07335 | 0.000116767 | 0.00026007  | 2.227264963 | 0.014749672 | 0.024832358 |
| K18475 | 0.000119711 | 6.93E-05    | 0.579154311 | 0.014843612 | 0.024969389 |
| K06857 | 3.11E-05    | 9.04E-05    | 2.907502088 | 0.014902279 | 0.025046904 |
| K01153 | 6.80E-06    | 0.00017121  | 25.19642729 | 0.014949259 | 0.025104663 |
| K02334 | 0.000107721 | 7.03E-05    | 0.652961236 | 0.015207762 | 0.02551724  |
| K05896 | 8.90E-05    | 0.000345193 | 3.877918646 | 0.015297762 | 0.025646627 |
| K10192 | 9.44E-05    | 0.000206293 | 2.18638838  | 0.01534629  | 0.025706327 |
| K02112 | 0.003899671 | 0.003166952 | 0.812107332 | 0.015387164 | 0.025753118 |
| K06406 | 0.000368763 | 0.000217688 | 0.590320245 | 0.015415086 | 0.02577817  |
| K02919 | 0.000555079 | 0.000113041 | 0.20364868  | 0.01547161  | 0.025850968 |
| K02030 | 0.001345915 | 0.001771369 | 1.316107293 | 0.015545078 | 0.025951934 |
| K00940 | 2.99E-05    | 9.45E-05    | 3.161172593 | 0.015620427 | 0.026055868 |
| K04655 | 0.000169873 | 7.90E-05    | 0.46488293  | 0.015751482 | 0.026252469 |

|        |             |             |             |             |             |
|--------|-------------|-------------|-------------|-------------|-------------|
| K01686 | 0.000811429 | 0.000378759 | 0.466779883 | 0.015782746 | 0.026282564 |
| K11962 | 4.17E-05    | 0.000100427 | 2.4082551   | 0.015866417 | 0.026399807 |
| K11928 | 7.36E-05    | 6.41E-05    | 0.871130521 | 0.015914106 | 0.026421569 |
| K07503 | 7.10E-05    | 6.09E-05    | 0.857540628 | 0.015914106 | 0.026421569 |
| K02388 | 0.000110137 | 0.000234465 | 2.128846729 | 0.015926774 | 0.026421569 |
| K07699 | 0.000218707 | 0.000334395 | 1.528962819 | 0.01595524  | 0.026421569 |
| K01821 | 3.79E-05    | 0.000125267 | 3.303819606 | 0.015970613 | 0.026421569 |
| K01661 | 2.28E-05    | 0.000302881 | 13.27322535 | 0.015975928 | 0.026421569 |
| K03310 | 0.002370609 | 0.001604231 | 0.676717074 | 0.015983629 | 0.026421569 |
| K18929 | 1.03E-05    | 4.07E-05    | 3.943524444 | 0.01599899  | 0.026421569 |
| K00254 | 4.03E-06    | 3.08E-05    | 7.660883096 | 0.01599899  | 0.026421569 |
| K07090 | 0.000258798 | 0.000472704 | 1.826540457 | 0.016059784 | 0.026499975 |
| K07979 | 0.000163589 | 0.000332602 | 2.033155032 | 0.016191282 | 0.026679436 |
| K08744 | 2.51E-05    | 8.66E-05    | 3.456092367 | 0.016196817 | 0.026679436 |
| K02895 | 0.002853707 | 0.002138725 | 0.749455237 | 0.016208763 | 0.026679436 |
| K02498 | 2.40E-05    | 6.47E-05    | 2.698678413 | 0.016316609 | 0.026834754 |
| K04095 | 2.18E-05    | 4.53E-05    | 2.078049522 | 0.016403577 | 0.026955507 |
| K01697 | 0.000103433 | 7.02E-05    | 0.678655987 | 0.016494589 | 0.027060372 |
| K01201 | 7.57E-05    | 6.49E-05    | 0.857639572 | 0.016494589 | 0.027060372 |
| K03110 | 6.89E-05    | 6.72E-05    | 0.974746106 | 0.016531801 | 0.027076777 |
| K10805 | 0.000112612 | 5.61E-05    | 0.498256099 | 0.016531801 | 0.027076777 |
| K00014 | 0.000168087 | 0.000468229 | 2.785633674 | 0.016622945 | 0.027203668 |
| K01802 | 3.52E-05    | 6.10E-05    | 1.734017018 | 0.016676366 | 0.027268668 |
| K00547 | 0.000111954 | 0.000337835 | 3.017631175 | 0.016728174 | 0.027330925 |
| K15771 | 0.000122281 | 0.000283829 | 2.321122406 | 0.016758226 | 0.027357564 |
| K08681 | 0.000214619 | 0.0001902   | 0.886224473 | 0.016847149 | 0.027463537 |

|        |             |             |             |             |             |
|--------|-------------|-------------|-------------|-------------|-------------|
| K01224 | 7.83E-05    | 1.75E-05    | 0.223283186 | 0.016946716 | 0.027463537 |
| K14983 | 6.62E-06    | 0           | 0           | 0.016947348 | 0.027463537 |
| K09976 | 1.56E-05    | 0           | 0           | 0.016947348 | 0.027463537 |
| K02075 | 1.18E-05    | 0           | 0           | 0.016947348 | 0.027463537 |
| K01252 | 1.28E-05    | 0           | 0           | 0.016947348 | 0.027463537 |
| K22336 | 1.57E-05    | 0           | 0           | 0.016947348 | 0.027463537 |
| K01823 | 1.40E-05    | 0           | 0           | 0.016947348 | 0.027463537 |
| K03212 | 1.37E-05    | 0           | 0           | 0.016947348 | 0.027463537 |
| K09974 | 0.000439054 | 0.000255474 | 0.581873972 | 0.017014172 | 0.027549391 |
| K01856 | 2.14E-05    | 7.60E-05    | 3.546233724 | 0.01717784  | 0.027791791 |
| K00324 | 8.91E-05    | 0.000196604 | 2.207790213 | 0.017245298 | 0.027878264 |
| K01626 | 0.000117471 | 0.000126035 | 1.072905359 | 0.017295636 | 0.027914288 |
| K07862 | 3.53E-05    | 6.47E-05    | 1.829605858 | 0.017295636 | 0.027914288 |
| K01607 | 2.86E-05    | 0.000130579 | 4.570222581 | 0.017434273 | 0.028106478 |
| K07644 | 1.94E-05    | 6.88E-05    | 3.537080645 | 0.017457089 | 0.028106478 |
| K01430 | 2.84E-05    | 0.000126248 | 4.440294821 | 0.017457089 | 0.028106478 |
| K04077 | 0.0022302   | 0.001803325 | 0.808593091 | 0.017867733 | 0.028744373 |
| K10008 | 8.55E-05    | 8.18E-05    | 0.95575924  | 0.01802223  | 0.028946116 |
| K16148 | 5.40E-05    | 6.40E-05    | 1.184226724 | 0.01802223  | 0.028946116 |
| K00868 | 0.000327072 | 0.000752943 | 2.302071661 | 0.018123132 | 0.029084704 |
| K03284 | 0.00016636  | 0.000308715 | 1.855705049 | 0.01839528  | 0.029497669 |
| K02054 | 0.000131441 | 0.000114209 | 0.868901704 | 0.018457784 | 0.029574066 |
| K14058 | 5.42E-05    | 0.000129634 | 2.393868777 | 0.018490832 | 0.029603182 |
| K14170 | 0.000161904 | 0.00048319  | 2.984425427 | 0.018773616 | 0.030031749 |
| K02529 | 0.000764796 | 0.001158232 | 1.514433327 | 0.018857882 | 0.030098697 |
| K09773 | 1.58E-05    | 7.10E-05    | 4.493755329 | 0.018860842 | 0.030098697 |



|        |             |             |             |             |             |
|--------|-------------|-------------|-------------|-------------|-------------|
| K22292 | 1.90E-05    | 6.97E-05    | 3.67818501  | 0.018860842 | 0.030098697 |
| K02035 | 0.000796826 | 0.002172885 | 2.726925955 | 0.019101892 | 0.030438985 |
| K02835 | 0.001780314 | 0.001556917 | 0.874518356 | 0.019106445 | 0.030438985 |
| K01934 | 0.00019131  | 0.000458082 | 2.394453728 | 0.019125667 | 0.030438985 |
| K11145 | 6.43E-05    | 0.000133099 | 2.069245253 | 0.019135261 | 0.030438985 |
| K03612 | 9.32E-05    | 0.000197882 | 2.123843215 | 0.019151061 | 0.030439786 |
| K09825 | 0.000226764 | 0.000158781 | 0.700201705 | 0.019471354 | 0.030924177 |
| K00175 | 0.00094842  | 0.000617361 | 0.650935546 | 0.019607734 | 0.031115941 |
| K00609 | 0.001840269 | 0.001439237 | 0.782079412 | 0.019642117 | 0.031145668 |
| K01537 | 0.000240619 | 0.000343521 | 1.427658494 | 0.019942535 | 0.03159685  |
| K17318 | 0.000247947 | 0.000446713 | 1.801649112 | 0.019975329 | 0.031623632 |
| K00145 | 0.003748219 | 0.003265321 | 0.871165974 | 0.020151183 | 0.031876672 |
| K03698 | 0.00016423  | 0.000156778 | 0.954621471 | 0.020222549 | 0.031964155 |
| K06925 | 0.000226796 | 0.00045727  | 2.016222404 | 0.020386988 | 0.032198496 |
| K00794 | 0.0025515   | 0.001947062 | 0.763105081 | 0.02041998  | 0.032225028 |
| K18344 | 1.97E-06    | 3.33E-05    | 16.89939007 | 0.020543853 | 0.032394824 |
| K01928 | 0.000937937 | 0.000799008 | 0.851878371 | 0.021013272 | 0.033108798 |
| K03711 | 0.000648563 | 0.000915706 | 1.411900845 | 0.021171928 | 0.033332386 |
| K00796 | 0.000111022 | 0.000247379 | 2.228190266 | 0.021434775 | 0.033719528 |
| K02103 | 0.00012523  | 0.000246741 | 1.970295469 | 0.021632222 | 0.034003255 |
| K11175 | 5.55E-05    | 0.000141156 | 2.545107087 | 0.021774423 | 0.034199764 |
| K10006 | 6.83E-05    | 5.69E-05    | 0.832942563 | 0.021922307 | 0.034404883 |
| K06334 | 0.000196786 | 0.000346553 | 1.761065203 | 0.021988744 | 0.034481955 |
| K02888 | 0.002469585 | 0.001862658 | 0.754239219 | 0.022098746 | 0.034627169 |
| K19506 | 1.08E-05    | 5.89E-05    | 5.455327409 | 0.022230405 | 0.034806063 |
| K06896 | 7.87E-05    | 1.37E-05    | 0.174046173 | 0.022576419 | 0.035320026 |

|        |             |             |             |             |             |
|--------|-------------|-------------|-------------|-------------|-------------|
| K03497 | 0.001249141 | 0.002210768 | 1.769830353 | 0.02268525  | 0.035461485 |
| K09015 | 3.88E-05    | 4.66E-05    | 1.199704967 | 0.022720298 | 0.035461485 |
| K02503 | 5.90E-05    | 5.49E-05    | 0.929997257 | 0.022720298 | 0.035461485 |
| K17686 | 0.000183603 | 0.000510655 | 2.781303613 | 0.022869568 | 0.03566649  |
| K04750 | 4.94E-05    | 0.000135817 | 2.746856481 | 0.02290757  | 0.03569778  |
| K21757 | 3.79E-05    | 8.71E-05    | 2.299099864 | 0.022947278 | 0.035731678 |
| K01921 | 9.30E-05    | 0.000233487 | 2.511040498 | 0.023136838 | 0.035998676 |
| K13052 | 7.97E-06    | 0           | 0           | 0.023544102 | 0.036546618 |
| K07742 | 9.21E-06    | 0           | 0           | 0.023544102 | 0.036546618 |
| K06198 | 4.63E-06    | 0           | 0           | 0.023544102 | 0.036546618 |
| K02992 | 0.002546594 | 0.002013599 | 0.790703126 | 0.023588512 | 0.036570455 |
| K00215 | 7.55E-05    | 0.000147392 | 1.951360381 | 0.023596213 | 0.036570455 |
| K05970 | 8.96E-05    | 6.30E-05    | 0.702696298 | 0.024187219 | 0.03745725  |
| K02899 | 0.003610916 | 0.0030265   | 0.838153007 | 0.024209355 | 0.037462377 |
| K01693 | 0.00030588  | 0.000480158 | 1.569757404 | 0.024274453 | 0.037533925 |
| K10974 | 5.31E-05    | 0.000168298 | 3.171633679 | 0.024337993 | 0.037602955 |
| K03502 | 0.000350379 | 0.00068052  | 1.942237568 | 0.024478364 | 0.037789179 |
| K21990 | 4.59E-05    | 0.00014091  | 3.067571134 | 0.024496503 | 0.037789179 |
| K01799 | 3.70E-05    | 7.88E-05    | 2.132546974 | 0.024573008 | 0.037877836 |
| K04042 | 7.75E-05    | 0.00018252  | 2.355460054 | 0.024655397 | 0.037975418 |
| K00620 | 9.82E-05    | 0.000230797 | 2.351333732 | 0.025022131 | 0.038510472 |
| K02982 | 0.002243882 | 0.001768883 | 0.788313793 | 0.025165796 | 0.03870165  |
| K02396 | 0.000300362 | 0.000546956 | 1.82099076  | 0.025246643 | 0.038796    |
| K05772 | 4.00E-05    | 0.000114537 | 2.863485415 | 0.025392839 | 0.038978784 |
| K01905 | 4.01E-05    | 0.000205242 | 5.116523501 | 0.025412155 | 0.038978784 |
| K10112 | 0.000270544 | 0.000275289 | 1.017535558 | 0.025424352 | 0.038978784 |

|        |             |             |             |             |             |
|--------|-------------|-------------|-------------|-------------|-------------|
| K06200 | 0.000297075 | 0.000920025 | 3.09694471  | 0.025746139 | 0.039441737 |
| K02871 | 0.001139942 | 0.001384883 | 1.214871492 | 0.025820756 | 0.039451252 |
| K09922 | 4.19E-05    | 0.000188365 | 4.492608656 | 0.025985479 | 0.039451252 |
| K06994 | 9.80E-06    | 0           | 0           | 0.02601448  | 0.039451252 |
| K05846 | 7.85E-06    | 0           | 0           | 0.02601448  | 0.039451252 |
| K01654 | 1.17E-05    | 0           | 0           | 0.02601448  | 0.039451252 |
| K09780 | 1.43E-05    | 0           | 0           | 0.02601448  | 0.039451252 |
| K07067 | 9.61E-06    | 0           | 0           | 0.02601448  | 0.039451252 |
| K00244 | 5.53E-07    | 0           | 0           | 0.02601448  | 0.039451252 |
| K07451 | 3.32E-05    | 0           | 0           | 0.02601448  | 0.039451252 |
| K07223 | 1.20E-05    | 0           | 0           | 0.02601448  | 0.039451252 |
| K21885 | 1.41E-05    | 0           | 0           | 0.02601448  | 0.039451252 |
| K01919 | 1.60E-05    | 0           | 0           | 0.02601448  | 0.039451252 |
| K09819 | 1.10E-05    | 0           | 0           | 0.02601448  | 0.039451252 |
| K03602 | 8.38E-05    | 0.000178107 | 2.124982468 | 0.026029896 | 0.039451252 |
| K00656 | 0.000196111 | 0.000222184 | 1.132948895 | 0.026114815 | 0.039549834 |
| K02416 | 8.43E-05    | 0.000192247 | 2.280306024 | 0.026221295 | 0.039680896 |
| K03588 | 0.000119287 | 0.000223026 | 1.869654985 | 0.02656091  | 0.040164293 |
| K02663 | 2.27E-05    | 5.45E-05    | 2.402332359 | 0.026721403 | 0.040214315 |
| K00262 | 0.002688381 | 0.00206501  | 0.768123907 | 0.026832603 | 0.040214315 |
| K09181 | 0           | 7.40E-06    | inf         | 0.026856696 | 0.040214315 |
| K20107 | 7.61E-06    | 0           | 0           | 0.026856696 | 0.040214315 |
| K20108 | 7.61E-06    | 0           | 0           | 0.026856696 | 0.040214315 |
| K03319 | 0           | 4.73E-05    | inf         | 0.026856696 | 0.040214315 |
| K03187 | 0           | 4.56E-06    | inf         | 0.026856696 | 0.040214315 |
| K19294 | 2.75E-05    | 0           | 0           | 0.026856696 | 0.040214315 |

|        |             |             |             |             |             |
|--------|-------------|-------------|-------------|-------------|-------------|
| K18471 | 0           | 2.95E-05    | inf         | 0.026856696 | 0.040214315 |
| K02777 | 7.61E-06    | 0           | 0           | 0.026856696 | 0.040214315 |
| K15773 | 0           | 3.97E-05    | inf         | 0.026856696 | 0.040214315 |
| K17195 | 0           | 3.15E-05    | inf         | 0.026856696 | 0.040214315 |
| K13570 | 0           | 0.00010034  | inf         | 0.026856696 | 0.040214315 |
| K02810 | 0.000175727 | 0.000542286 | 3.085954426 | 0.02728476  | 0.040793893 |
| K02809 | 0.000175727 | 0.000542286 | 3.085954426 | 0.02728476  | 0.040793893 |
| K09770 | 0.000166535 | 0.000304439 | 1.828075705 | 0.027419677 | 0.040938655 |
| K09766 | 0.000143677 | 0.000270478 | 1.882545026 | 0.027422727 | 0.040938655 |
| K02034 | 0.000963265 | 0.002413606 | 2.505651142 | 0.027665318 | 0.041269852 |
| K03282 | 0.000590783 | 0.000422433 | 0.715039031 | 0.02793382  | 0.041639178 |
| K07107 | 0.000403625 | 0.000590722 | 1.463544153 | 0.028070287 | 0.04181128  |
| K19221 | 0.000434035 | 0.000256772 | 0.591592258 | 0.028101715 | 0.041826786 |
| K02073 | 0.00014588  | 0.000378381 | 2.593780873 | 0.028157462 | 0.041878438 |
| K01273 | 0.000168261 | 0.000342382 | 2.034819936 | 0.028791103 | 0.042787555 |
| K02124 | 0.000291282 | 0.000239029 | 0.820608179 | 0.02881172  | 0.042787555 |
| K00077 | 0.000169561 | 0.00032852  | 1.93747241  | 0.028885444 | 0.042865052 |
| K00567 | 6.89E-05    | 0.000216967 | 3.146772643 | 0.029548035 | 0.04381564  |
| K06140 | 3.85E-05    | 0.000116072 | 3.012873303 | 0.029693147 | 0.04397211  |
| K00600 | 0.002210534 | 0.001870374 | 0.846118695 | 0.029697746 | 0.04397211  |
| K15342 | 4.07E-05    | 0.000227061 | 5.574354168 | 0.029723251 | 0.043977151 |
| K06382 | 0.000943649 | 0.00054387  | 0.576348166 | 0.029768124 | 0.044010823 |
| K09155 | 1.82E-05    | 0.000173357 | 9.549715894 | 0.030414416 | 0.044932954 |
| K02687 | 0.00052839  | 0.000690317 | 1.306454403 | 0.031256399 | 0.046142606 |
| K03734 | 0.000372976 | 0.000558638 | 1.497785626 | 0.031290922 | 0.046159328 |
| K03701 | 0.001267877 | 0.000756883 | 0.596968721 | 0.031497331 | 0.046429399 |

|        |             |             |             |             |             |
|--------|-------------|-------------|-------------|-------------|-------------|
| K10118 | 0.000159639 | 0.000293149 | 1.836331807 | 0.031604106 | 0.046539763 |
| K02988 | 0.002516959 | 0.002005936 | 0.796968352 | 0.031618974 | 0.046539763 |
| K04769 | 0.000274575 | 0.000399775 | 1.45597849  | 0.03181233  | 0.046789753 |
| K02049 | 6.13E-05    | 0.000192446 | 3.137952129 | 0.031862834 | 0.046829423 |
| K18981 | 2.13E-05    | 6.80E-05    | 3.186445692 | 0.031984157 | 0.046973043 |
| K13954 | 1.51E-05    | 6.38E-06    | 0.421542736 | 0.032193505 | 0.047245631 |
| K00881 | 5.56E-05    | 5.59E-05    | 1.006635781 | 0.032238962 | 0.047277476 |
| K03790 | 0.000813262 | 0.000455418 | 0.559989081 | 0.032280226 | 0.047303129 |
| K05825 | 5.37E-05    | 0.000232142 | 4.320041567 | 0.032304681 | 0.047304133 |
| K09913 | 4.94E-05    | 9.49E-05    | 1.919920615 | 0.032392371 | 0.04739766  |
| K06872 | 0.000199219 | 0.000512296 | 2.571524068 | 0.032504585 | 0.04752691  |
| K15633 | 0.002307091 | 0.001830627 | 0.793478492 | 0.032819149 | 0.04795162  |
| K07053 | 2.12E-05    | 6.97E-05    | 3.285835224 | 0.033138434 | 0.0483826   |
| K03087 | 2.22E-05    | 6.64E-05    | 2.983611359 | 0.033333543 | 0.048613518 |
| K00784 | 0.000620894 | 0.000871792 | 1.404090513 | 0.033345453 | 0.048613518 |
| K00330 | 0.00132459  | 0.000959086 | 0.724062631 | 0.033451555 | 0.048732499 |
| K06902 | 0.000170127 | 0.000317409 | 1.865714447 | 0.03382207  | 0.049236224 |
| K06346 | 0.000183882 | 0.000447899 | 2.435796803 | 0.033961521 | 0.04940309  |
| K00243 | 0.000301027 | 0.000413207 | 1.372655414 | 0.034005193 | 0.049430486 |
| K21471 | 0.000669547 | 0.00093973  | 1.40353216  | 0.034060402 | 0.049474598 |
| K07003 | 0.000473107 | 0.000293727 | 0.620845951 | 0.034101473 | 0.049498126 |

---

**Table S7 The differential KO-enriched metabolism pathways between SCAD patients and HCs.**

| <b>ID</b> | <b>Description</b>                                  | <b>GeneRatio</b> | <b>BgRatio</b> | <b>pvalue</b> | <b>p.adjust</b> | <b>qvalue</b> |
|-----------|-----------------------------------------------------|------------------|----------------|---------------|-----------------|---------------|
| map01230  | Biosynthesis of amino acids                         | 80/552           | 237/5774       | 5.14E-26      | 5.86E-24        | 3.79E-24      |
| map01240  | Biosynthesis of cofactors                           | 101/552          | 375/5774       | 5.32E-24      | 3.03E-22        | 1.96E-22      |
| map00620  | Pyruvate metabolism                                 | 34/552           | 109/5774       | 1.68E-10      | 6.37E-09        | 4.12E-09      |
| map00010  | Glycolysis / Gluconeogenesis                        | 30/552           | 105/5774       | 2.04E-08      | 5.81E-07        | 3.76E-07      |
| map00270  | Cysteine and methionine metabolism                  | 31/552           | 117/5774       | 8.16E-08      | 1.86E-06        | 1.20E-06      |
| map00020  | Citrate cycle (TCA cycle)                           | 20/552           | 61/5774        | 4.25E-07      | 8.08E-06        | 5.22E-06      |
| map00640  | Propanoate metabolism                               | 28/552           | 110/5774       | 8.56E-07      | 1.39E-05        | 9.01E-06      |
| map01200  | Carbon metabolism                                   | 61/552           | 356/5774       | 2.82E-06      | 4.02E-05        | 2.60E-05      |
| map00720  | Carbon fixation pathways in prokaryotes             | 26/552           | 106/5774       | 4.47E-06      | 5.23E-05        | 3.38E-05      |
| map00450  | Selenocompound metabolism                           | 13/552           | 33/5774        | 4.59E-06      | 5.23E-05        | 3.38E-05      |
| map00230  | Purine metabolism                                   | 41/552           | 210/5774       | 5.38E-06      | 5.57E-05        | 3.60E-05      |
| map00400  | Phenylalanine, tyrosine and tryptophan biosynthesis | 19/552           | 71/5774        | 2.35E-05      | 0.000222845     | 0.000144037   |
| map00650  | Butanoate metabolism                                | 22/552           | 99/5774        | 0.000121096   | 0.001061916     | 0.000686372   |
| map00260  | Glycine, serine and threonine metabolism            | 22/552           | 100/5774       | 0.000141666   | 0.001153565     | 0.00074561    |
| map00860  | Porphyrin and chlorophyll metabolism                | 26/552           | 129/5774       | 0.000168733   | 0.001282368     | 0.000828862   |
| map00910  | Nitrogen metabolism                                 | 16/552           | 65/5774        | 0.000297133   | 0.001825163     | 0.001179699   |
| map00500  | Starch and sucrose metabolism                       | 22/552           | 105/5774       | 0.000298151   | 0.001825163     | 0.001179699   |
| map00220  | Arginine biosynthesis                               | 15/552           | 59/5774        | 0.000312856   | 0.001825163     | 0.001179699   |
| map00300  | Lysine biosynthesis                                 | 13/552           | 47/5774        | 0.000320204   | 0.001825163     | 0.001179699   |
| map00340  | Histidine metabolism                                | 13/552           | 47/5774        | 0.000320204   | 0.001825163     | 0.001179699   |
| map00240  | Pyrimidine metabolism                               | 21/552           | 100/5774       | 0.000393908   | 0.002138357     | 0.001382133   |
| map00670  | One carbon pool by folate                           | 11/552           | 37/5774        | 0.000466904   | 0.002419414     | 0.001563795   |
| map00540  | Lipopolysaccharide biosynthesis                     | 15/552           | 62/5774        | 0.000556893   | 0.002749545     | 0.001777176   |

|          |                                             |        |          |             |             |             |
|----------|---------------------------------------------|--------|----------|-------------|-------------|-------------|
| map00790 | Folate biosynthesis                         | 18/552 | 82/5774  | 0.000578852 | 0.002749545 | 0.001777176 |
| map00051 | Fructose and mannose metabolism             | 22/552 | 111/5774 | 0.000671343 | 0.003028348 | 0.001957381 |
| map00190 | Oxidative phosphorylation                   | 36/552 | 218/5774 | 0.000690676 | 0.003028348 | 0.001957381 |
| map00250 | Alanine, aspartate and glutamate metabolism | 16/552 | 70/5774  | 0.000723873 | 0.003056352 | 0.001975481 |
| map00750 | Vitamin B6 metabolism                       | 8/552  | 24/5774  | 0.001221053 | 0.004971428 | 0.003213296 |
| map00290 | Valine, leucine and isoleucine biosynthesis | 7/552  | 19/5774  | 0.001271321 | 0.004997605 | 0.003230216 |
| map01210 | 2-Oxocarboxylic acid metabolism             | 17/552 | 82/5774  | 0.001602338 | 0.006088884 | 0.003935567 |
| map00521 | Streptomycin biosynthesis                   | 7/552  | 20/5774  | 0.001796886 | 0.006607903 | 0.004271036 |
| map00770 | Pantothenate and CoA biosynthesis           | 11/552 | 44/5774  | 0.002258232 | 0.008044952 | 0.005199877 |
| map00520 | Amino sugar and nucleotide sugar metabolism | 25/552 | 147/5774 | 0.002942239 | 0.010164098 | 0.006569593 |
| map00780 | Biotin metabolism                           | 7/552  | 23/5774  | 0.004410238 | 0.014787268 | 0.009557791 |
| map00710 | Carbon fixation in photosynthetic organisms | 9/552  | 36/5774  | 0.005575057 | 0.017654346 | 0.011410935 |
| map00730 | Thiamine metabolism                         | 9/552  | 36/5774  | 0.005575057 | 0.017654346 | 0.011410935 |
| map00061 | Fatty acid biosynthesis                     | 9/552  | 39/5774  | 0.009695076 | 0.029871315 | 0.019307406 |

---

**Table S8 The metabolites differentially abundant between SCAD patients and HCs.**

| Metabolites                    | Normal_mean | SCAD_mean   | FC          | p_value     | FDR         | Class                    | VIP         |
|--------------------------------|-------------|-------------|-------------|-------------|-------------|--------------------------|-------------|
| 5_Dodecenoic acid              | 0.659600115 | 0.369674017 | 0.560451718 | 5.65E-06    | 0.001090222 | Fatty acids              | 0.467364363 |
| Docosahexaenoic acid DHA       | 0.745504562 | 0.391518046 | 0.525171898 | 5.27E-05    | 0.004160551 | Fatty acids              | 0.324986424 |
| Eicosapentaenoic acid EPA      | 0.866790053 | 0.376627906 | 0.4345088   | 0.000100469 | 0.004160551 | Fatty acids              | 0.627204717 |
| Heptadecanoic acid             | 0.525546899 | 0.337239639 | 0.641692758 | 0.000107786 | 0.004160551 | Fatty acids              | 0.486887458 |
| Docosapentaenoic acid DPA      | 0.670884232 | 0.364910178 | 0.543924213 | 0.00016339  | 0.005255727 | Fatty acids              | 1.924938041 |
| Glutaryl carnitine             | 0.398162971 | 0.534410726 | 1.342190927 | 0.000262132 | 0.007227357 | Carnitines               | 1.395088845 |
| Myristelaidic acid             | 0.573546485 | 0.347365788 | 0.605645395 | 0.000364379 | 0.008790643 | Fatty acids              | 0.495478543 |
| 8,11,14_Eicosatrienoic acid    | 0.506334236 | 0.339022227 | 0.669562125 | 0.000471869 | 0.010118964 | Fatty acids              | 0.523886287 |
| Methionine sulfoxide           | 0.658158058 | 0.440471408 | 0.669248674 | 0.000608379 | 0.011741708 | Amino acids              | 1.404272807 |
| Docosapentaenoic acid<br>22n_6 | 0.515983055 | 0.333464555 | 0.64627036  | 0.000733979 | 0.012332201 | Fatty acids              | 0.451655933 |
| Acetylglycine                  | 0.549980653 | 0.459774485 | 0.835983017 | 0.000780935 | 0.012332201 | Amino acids              | 1.07525645  |
| Dimethylglycine                | 0.365464856 | 0.514452106 | 1.407665053 | 0.000830666 | 0.012332201 | Amino acids              | 0.640973058 |
| Palmitoleic acid               | 0.594919917 | 0.348366331 | 0.585568445 | 0.001196179 | 0.016490185 | Fatty acids              | 0.750536186 |
| L_Alpha_aminobutyric acid      | 0.614508997 | 0.496638474 | 0.808187473 | 0.001608797 | 0.018264581 | Amino acids              | 0.515554917 |
| Glycodeoxycholic acid          | 0.285311538 | 0.780406869 | 2.735279743 | 0.001608797 | 0.018264581 | Bile acids               | 1.299119543 |
| Malonic acid                   | 0.443335176 | 0.849864463 | 1.916979543 | 0.001608797 | 0.018264581 | Organic acids            | 0.971504348 |
| 3_Phenylbutyric acid           | 0.408790472 | 0.745521582 | 1.823725436 | 0.001915583 | 0.018485377 | Phenylpropanoic<br>acids | 0.760957198 |
| Myristoyl carnitine            | 0.365085444 | 0.440744276 | 1.20723596  | 0.001915583 | 0.018485377 | Carnitines               | 1.335094774 |
| L_threonine                    | 0.59272025  | 0.432739382 | 0.73009043  | 0.001915583 | 0.018485377 | Amino acids              | 1.80627911  |
| Acetic acid                    | 0.707181109 | 0.523088644 | 0.739681303 | 0.002851193 | 0.026203822 | Fatty acids              | 1.549680108 |
| 10Z_Heptadecenoic acid         | 0.535287435 | 0.333431435 | 0.622901667 | 0.004187689 | 0.035140177 | Fatty acids              | 0.578426494 |
| L_Pipecolic acid               | 0.578981776 | 0.475415876 | 0.821124076 | 0.004187689 | 0.035140177 | Amino acids              | 0.928988081 |



|                                |             |             |             |             |             |               |             |
|--------------------------------|-------------|-------------|-------------|-------------|-------------|---------------|-------------|
| L_Homocitrulline               | 0.426885515 | 0.584079565 | 1.368234678 | 0.005185475 | 0.041699858 | Amino acids   | 1.237785572 |
| Alpha_Linolenic acid           | 0.739710231 | 0.414136532 | 0.559863194 | 0.00546637  | 0.042200379 | Fatty acids   | 0.534525288 |
| Linoleic acid                  | 0.521982124 | 0.398415283 | 0.763273807 | 0.006069726 | 0.042343399 | Fatty acids   | 0.150044098 |
| Lauroylcarnitine               | 0.289379521 | 0.424300476 | 1.466242236 | 0.006069726 | 0.042343399 | Carnitines    | 1.129659555 |
| Decanoic acid                  | 0.516589304 | 0.381905068 | 0.739281796 | 0.006393354 | 0.042343399 | Fatty acids   | 0.707018829 |
| 4_Hydroxybenzoic acid          | 0.580287288 | 0.39255068  | 0.676476443 | 0.006393354 | 0.042343399 | Benzenoids    | 0.62490102  |
| L_Cystine                      | 0.579867688 | 0.444338599 | 0.766275839 | 0.006732427 | 0.042343399 | Amino acids   | 1.046312572 |
| Myristoleic acid               | 0.559759434 | 0.343897559 | 0.614366705 | 0.007087577 | 0.042343399 | Fatty acids   | 1.322788515 |
| D_Maltose and<br>Alpha_Lactose | 0.509312461 | 0.911961746 | 1.790574185 | 0.007459459 | 0.042343399 | Carbohydrates | 1.595506177 |
| Oleic acid                     | 0.501394454 | 0.362346126 | 0.722676774 | 0.007459459 | 0.042343399 | Fatty acids   | 0.54910489  |
| D_2_Hydroxyglutaric acid       | 0.430362833 | 0.884570996 | 2.055407503 | 0.009128108 | 0.048936799 | Organic acids | 0.710716792 |
| 3_Hydroxyisovaleric acid       | 0.587274525 | 0.479646658 | 0.816733295 | 0.009128108 | 0.048936799 | Fatty acids   | 1.094992155 |

---
